# Supplementary material for: Optimising global landscape evolution models with 10 Be
Source: Copernicus journal article supplement (doi:10.5194/esurf-11-865-2023), 2023-09-18
Supplement: Supplementary file 1 [file TableS1.xlsx]

## Sheet: TableS1
Octopus ID	OCTOPUS Reference ID	Centroid Lon	Centroid Lat	Area (sq. degrees)	MAP (mm/yr)	GLiM class	OCTOPUS gradient	Octopus Erosion rate (mm/yr)	90m DEM avg. gradient	90m DEM avg. gradient	30m DEM avg. gradient	Rate averaged?	90m Erates, bestfit advection	90m Erates, bestfit diffusion	90m Erates, bestfit adv+diff
S045WTS012	Finnegan:2008namche	89.1213	29.5952	19.3247	789	sm	0.3252	0.12178	0.0955412	0.0955412	0	0	0.121217	0.127492	0.148793
S137WTS001	Molliex:2016lion	5.70973	46.0251	9.35156	1315	sc	0.19333	0.11318	0.206555	0.206555	0	0	0.0830368	0.118069	0.0944157
S153WTS001	Hidy:2014texas	-99.3392	32.4702	11.1538	763	su	0.02141	0.01825	0.0310473	0.0310473	0	0	0.00566848	0.00536577	0.012876
S153WTS002	Hidy:2014texas	-100.521	31.645	10.1997	613	su	0.02353	0.0184125	0.0332709	0.0332709	0	1	0.00597947	0.00572387	0.0146138
S143WTS038	Wittmann:2016po	9.10879	45.2887	8.42084	1178	su	0.2249	0.272652	0.273478	0.273478	0	1	0.111868	0.175159	0.129274
S071WTS040	Henck:2011three	93.9424	31.4518	8.24561	920	sm	0.32774	0.05473	0.322503	0.322503	0	0	0.200832	0.127003	6.47615
S148WTS002	Fuchs:2015pamir	72.8007	37.7603	7.31856	487	sc	0.39696	0.58932	0.409559	0.409559	0	0	0.22771	0.272225	2.95668
S071WTS047	Henck:2011three	96.5712	31.6657	7.7347	860	sm	0.36776	0.126616	0.381232	0.381232	0	1	0.155741	0.154902	1.1268
S143WTS035	Wittmann:2016po	8.61067	45.2991	6.38906	1244	su	0.24619	0.32956	0.274967	0.274967	0	0	0.1124	0.175345	0.128502
S026WTS004	Reuter:2005susquehanna	-76.9538	41.4284	6.71888	1179	ss	0.10425	0.03506	0.133659	0.133659	0	0	0.026464	0.0213952	0.0223467
S071WTS033	Henck:2011three	96.3501	31.9815	7.0098	836	sm	0.34895	0.11175	0.362146	0.362146	0	0	0.127393	0.140625	0.604845
S074WTS012	Wittmann:2011napo	-75.8629	-1.2903	8.14315	3190	ss	0.0862	0.10303	0.0367253	0.0367253	0	0	0.0294612	0.0364128	0.0423988
S136WTS001	Schaller:2016european	14.6235	49.7313	5.23773	726	mt	0.07146	0.02493	0.0807561	0.0807561	0	0	0.0167893	0.0154239	0.017088
S074WTS011	Wittmann:2011napo	-76.1064	-1.09698	7.28737	3206	ss	0.0936	0.34319	0.0367253	0.0367253	0	1	0.0324674	0.0399275	0.0461934
S009WTS039	Schaller:2001european	3.32954	46.3601	4.92714	930	pa	0.0659	0.035395	0.0906048	0.0906048	0	1	0.0204995	0.0170502	0.0216087
S143WTS034	Wittmann:2016po	8.2464	45.2374	4.92859	1242	su	0.24065	0.24513	0.275097	0.275097	0	0	0.112539	0.175954	0.129051
S120WTS015	Regard:2016cameroon	13.115	5.75347	6.46107	1726	mt	0.05563	0.01016	0.0675482	0.0675482	0	0	0.00948318	0.0100151	0.0148623
S074WTS008	Wittmann:2011napo	-76.3767	-0.960072	6.46198	3230	ss	0.102	0.19506	0.0367253	0.0367253	0	0	0.0360049	0.0439883	0.0503479
S257WTS014	Butler:2007orange	17.623	-25.6206	5.73407	158	ss	0.03551	0.00314	0.0459127	0.0459127	0	0	0.0101177	0.00924109	0.0124208
S009WTS040	Schaller:2001european	3.55207	46.1848	4.3508	956	pa	0.01896	0.02896	0.0983021	0.0983021	0	0	0.0223296	0.0184316	0.0219413
S143WTS032	Wittmann:2016po	8.1076	45.2548	4.41666	1265	su	0.25508	0.24439	0.293203	0.293203	0	1	0.121576	0.192137	0.139728
S071WTS024	Henck:2011three	96.0043	32.3983	5.23728	831	sm	0.33189	0.1009	0.34292	0.34292	0	0	0.108152	0.13457	0.333894
S025WTS056	Safran:2005bolivian	-67.6634	-15.7826	5.95037	2002	sm	0.37717	0.51191	0.396606	0.396606	0	0	0.17552	0.16897	0.245136
S111WTS005	Olen:2015arun	86.9875	28.0157	5.3222	1868	mt	0.3811	1.00153	0.379684	0.379684	0	1	0.194882	0.191926	0.492377
S220WTS006	Balco:2013pacific	-122.283	41.8006	4.44289	970	vb	0.1991	0.26925	0.205111	0.205111	0	0	0.0702042	0.0517291	0.0700502
S164WTS079	Mandal:2015indian	77.0778	11.9379	5.74584	1073	mt	0.07154	0.01369	0.0846477	0.0846477	0	0	0.0208739	0.0192554	0.028662
S010WTS032	Kirchner:2001mountain	-114.774	44.8845	3.96071	723	pa	0.32007	0.10608	0.338062	0.338062	0	0	0.124459	0.100906	0.145101
S009WTS041	Schaller:2001european	3.67135	45.9952	3.79754	977	pa	0.03499	0.02997	0.106148	0.106148	0	0	0.0242382	0.0195992	0.0215557
S136WTS003	Schaller:2016european	14.1478	49.4797	3.48634	709	mt	0.07534	0.0238275	0.0843112	0.0843112	0	1	0.0175153	0.016282	0.0186997
S127WTS050	Kober:2015bolivian	-65.0981	-18.5388	5.07676	882	sm	0.27214	0.10223	0.313827	0.313827	0	0	0.102885	0.122226	0.161451
S153WTS004	Hidy:2014texas	-96.5872	32.3297	4.28622	1056	su	0.02086	0.03597	0.0299108	0.0299108	0	0	0.00405244	0.00473933	0.013024
S274WTS013	Matmon:2020alaska	-147.824	62.7168	2.30344	876	ss	0.14773	1.17809	0.164128	0.164128	0	0	0.0495562	0.304224	0.076932
S009WTS037	Schaller:2001european	5.43889	50.0439	3.13759	1016	sc	0.03896	0.0376704	0.0781466	0.0781466	0	1	0.0144529	0.0135568	0.0153619
S258WTS001	Fisher:2020magdalena	-75.2319	3.61523	4.60146	2281	ss	0.26168	0.16291	0.280297	0.280297	0	0	0.106409	0.106599	0.127277
S143WTS028	Wittmann:2016po	7.81425	45.0119	3.06432	1111	su	0.24561	0.19816	0.278282	0.278282	0	1	0.111278	0.16427	0.12376
S026WTS018	Reuter:2005susquehanna	-76.1687	42.0394	3.16005	1186	ss	0.11377	0.01773	0.11766	0.11766	0	0	0.0239656	0.0157753	0.0189011
S235WTS002	Collignon:2019zagros	52.8172	28.4767	3.69089	369	sc	0.14399	0.11193	0.179158	0.179158	0	0	0.0490784	0.0920299	0.0558346
S071WTS022	Henck:2011three	96.1299	32.5662	3.52637	817	sm	0.32658	0.09598	0.337576	0.337576	0	1	0.103036	0.134534	0.266379
S074WTS007	Wittmann:2011napo	-76.7015	-0.590117	4.04363	3304	ss	0.1354	0.39147	0.153385	0.153385	0	0	0.053226	0.0629561	0.0724424
S186WTS001	Portenga:2019potomac	-78.3816	39.1635	3.12879	1067	ss	0.11058	0.013	0.130931	0.130931	0	0	0.0264293	0.0280082	0.0249456
S009WTS032	Schaller:2001european	5.29303	49.8538	2.59145	1046	sc	0.06869	0.0153922	0.0799636	0.0799636	0	1	0.0148497	0.0135769	0.0154406
S257WTS001	Butler:2007orange	27.969	-30.1205	3.46148	873	vb	0.21325	0.02418	0.238998	0.238998	0	0	0.0640444	0.0541118	0.0578815
S230WTS001	Grin:2018tajikistan	71.6388	39.1724	3.08519	926	sm	0.41372	1.45018	0.454919	0.454919	0	1	0.213439	0.318683	0.243116
S235WTS001	Collignon:2019zagros	52.907	28.477	3.47121	376	sc	0.14782	0.14668	0.179173	0.179173	0	0	0.0490829	0.0920303	0.0557396
S136WTS015	Schaller:2016european	-3.6421	37.9872	3.08589	594	sm	0.13663	0.03085	0.151271	0.151271	0	0	0.0361515	0.0365607	0.0319022
S127WTS051	Kober:2015bolivian	-65.537	-18.2607	3.66061	841	sm	0.27279	0.07457	0.31117	0.31117	0	0	0.105881	0.107566	0.169033
S258WTS003	Fisher:2020magdalena	-75.2798	3.34843	3.7536	2246	ss	0.25972	0.13176	0.278164	0.278164	0	0	0.104335	0.102221	0.124093
S148WTS004	Fuchs:2015pamir	73.6077	38.0957	2.86027	373	sc	0.36763	0.80691	0.399513	0.399513	0	0	0.174392	0.245291	0.559891
S074WTS006	Wittmann:2011napo	-76.9136	-0.499305	3.61438	3350	ss	0.1477	0.522998	0.166914	0.166914	0	1	0.0593373	0.0695682	0.0797971
S120WTS014	Regard:2016cameroon	11.3392	5.73348	3.51493	2014	mt	0.0821	0.01116	0.0980977	0.0980977	0	0	0.0187481	0.0203381	0.0219885
S111WTS004	Olen:2015arun	87.2353	28.3066	3.08399	1435	mt	0.30025	0.81059	0.30104	0.30104	0	0	0.144557	0.126889	0.539242
S186WTS005	Portenga:2019potomac	-78.5802	39.1318	2.60578	1063	ss	0.12268	0.01353	0.144199	0.144199	0	0	0.0295496	0.031368	0.0268509
S164WTS078	Mandal:2015indian	76.7224	12.5111	3.27658	1169	mt	0.05835	0.0139	0.070808	0.070808	0	1	0.0129316	0.0124673	0.0211065
S116WTS007	Bierman:2014view	23.5362	-32.5529	2.8251	297	ss	0.06431	0.00461	0.0751133	0.0751133	0	0	0.0150914	0.0168642	0.0154947
S091WTS006	Lee:2013patagonian	-72.7549	-49.9217	2.1363	1805	ss	0.20604	0.10584	0.205554	0.205554	0	0	0.0945854	0.123361	0.0836122
S082WTS013	Bookhagen:2012andes	-66.0429	-25.6481	2.98964	734	mt	0.24416	0.492	0.257524	0.257524	0	0	0.107026	0.0731964	0.108334
S136WTS014	Schaller:2016european	-3.45129	38.0195	2.60076	585	sm	0.14034	0.02681	0.15547	0.15547	0	0	0.0378718	0.0381203	0.0333087
S111WTS001	Olen:2015arun	87.2363	28.3838	2.87967	1385	sm	0.29195	0.653558	0.291469	0.291469	0	1	0.138532	0.126309	0.560815
S009WTS042	Schaller:2001european	3.98334	46.2017	2.13256	978	pa	0.05272	0.02473	0.0987914	0.0987914	0	0	0.0203119	0.0175795	0.0189122
S136WTS016	Schaller:2016european	-3.3548	38.0118	2.41665	583	sm	0.14226	0.03061	0.157149	0.157149	0	0	0.0388358	0.0382367	0.0337787
S164WTS075	Mandal:2015indian	76.6182	12.5385	2.95239	1201	mt	0.05093	0.01058	0.0629095	0.0629095	0	0	0.0101696	0.0108485	0.0188377
S111WTS007	Olen:2015arun	87.2373	28.4588	2.61873	1133	sm	0.26308	0.30898	0.26405	0.26405	0	0	0.111255	0.100016	0.293684
S026WTS025	Reuter:2005susquehanna	-76.2041	42.3067	2.19897	1179	ss	0.10623	0.0922	0.11614	0.11614	0	0	0.0231803	0.0146995	0.0173334
S127WTS053	Kober:2015bolivian	-65.7494	-18.3357	2.7075	826	sm	0.27636	0.07256	0.314897	0.314897	0	0	0.108137	0.110888	0.154976
S143WTS026	Wittmann:2016po	7.61142	45.2403	1.99015	1185	mt	0.27241	0.26313	0.302536	0.302536	0	0	0.135461	0.193512	0.152575
S009WTS031	Schaller:2001european	5.14508	49.5901	1.81863	1050	sc	0.06909	0.02137	0.0797913	0.0797913	0	0	0.0137444	0.0135003	0.0149388
S038WTS035	Bierman:2007namibian	16.1687	-22.2021	2.56545	239	mt	0.0716	0.0083	0.0816896	0.0816896	0	0	0.0172138	0.021952	0.0188066
S218WTS005	Matmon:2018namibia	15.6455	-20.6008	2.54408	295	mt	0.04305	0.00553	0.0571371	0.0571371	0	1	0.0128774	0.0141811	0.016204
S136WTS002	Schaller:2016european	15.5963	50.2289	1.71023	765	sc	0.06409	0.03207	0.0732626	0.0732626	0	0	0.0153199	0.0128892	0.0134883
S230WTS009	Grin:2018tajikistan	72.0964	39.3101	2.04386	828	sm	0.39389	1.46713	0.432161	0.432161	0	1	0.2001	0.30232	0.225161
S218WTS004	Matmon:2018namibia	15.742	-20.5764	2.40338	309	mt	0.04126	0.00512	0.0544784	0.0544784	0	0	0.0124784	0.012737	0.0153271
S009WTS019	Schaller:2001european	9.25071	48.8793	1.68448	954	sm	0.11428	0.07543	0.132765	0.132765	0	0	0.0224148	0.0221958	0.0207994
S026WTS019	Reuter:2005susquehanna	-77.7109	41.2474	1.90063	1212	ss	0.14633	0.02868	0.160398	0.160398	0	0	0.0320376	0.0270141	0.02821
S134WTS006	West:2014dilution	103.27	31.9989	2.07863	1314	ss	-9.99999	0.99971	0.548542	0.548542	0	0	0.255044	0.326623	0.373852
S009WTS020	Schaller:2001european	9.27314	48.8479	1.58012	952	sm	0.09497	0.0807902	0.108445	0.108445	0	1	0.0217553	0.0222991	0.0205898
S091WTS003	Lee:2013patagonian	-71.1763	-51.9178	1.47931	489	su	0.04628	0.00883	0.0511924	0.0511924	0	0	0.0109595	0.00618124	0.00849231
S009WTS043	Schaller:2001european	3.27248	45.7255	1.65814	977	mt	0.03393	0.0381225	0.115707	0.115707	0	1	0.0293662	0.0218733	0.0248179
S016WTS006	Vance:2003himalaya	79.1335	30.546	2.03986	2036	mt	0.52842	2.01422	0.495873	0.495873	0	1	0.270558	0.333415	0.492502
S009WTS030	Schaller:2001european	5.25179	49.4388	1.52244	1067	sc	0.01496	0.02789	0.083881	0.083881	0	0	0.0144488	0.014215	0.0154607
S136WTS013	Schaller:2016european	-3.08917	37.9398	1.80223	592	sm	0.14614	0.03327	0.160902	0.160902	0	0	0.0421007	0.0402587	0.0358776
S230WTS005	Grin:2018tajikistan	72.3128	39.3293	1.76257	820	sm	0.38661	1.63093	0.423754	0.423754	0	0	0.194203	0.299406	0.219859
S064WTS002	Godard:2010regressive	103.283	32.0795	1.91484	1279	ss	0.5251	0.759753	0.543055	0.543055	0	1	0.247801	0.313377	0.360526
S218WTS003	Matmon:2018namibia	15.9222	-20.5342	2.10906	336	mt	0.03446	0.0055	0.0459599	0.0459599	0	0	0.00966008	0.00971645	0.0116714
S127WTS054	Kober:2015bolivian	-66.0297	-18.2135	2.09761	905	sm	0.27289	0.10633	0.310752	0.310752	0	0	0.107688	0.104914	0.15565
S120WTS013	Regard:2016cameroon	11.8094	3.70083	2.19414	1814	mt	0.06139	0.009415	0.0774331	0.0774331	0	1	0.00993481	0.0156934	0.0243781
S009WTS046	Schaller:2001european	3.28986	45.6472	1.53556	990	mt	0.1023	0.0420648	0.121163	0.121163	0	1	0.0311043	0.0228734	0.0259906
S074WTS004	Wittmann:2011napo	-77.3009	-0.626476	2.17685	3681	ss	0.1751	0.61384	0.196981	0.196981	0	0	0.0717541	0.0801549	0.0954783
S074WTS016	Wittmann:2011napo	-75.9907	-1.53883	2.17337	3125	ss	0.048	0.05724	0.0647154	0.0647154	0	0	0.00781269	0.0194078	0.0175624
S009WTS060	Schaller:2001european	4.15124	45.95	1.4742	982	pa	0.10015	0.02479	0.113243	0.113243	0	0	0.0248418	0.020897	0.0220899
S230WTS006	Grin:2018tajikistan	72.4051	39.3241	1.61841	820	sm	0.37985	1.62866	0.415489	0.415489	0	1	0.189908	0.285928	0.213147
S102WTS005	Li:2014tibetan	95.1081	35.6892	1.67859	372	ss	0.21276	0.04004	0.224207	0.224207	0	0	0.0653592	0.07482	0.0591018
S078WTS020	Hippe:2012altiplano	-69.0455	-17.3238	1.95308	881	ss	0.08987	0.05143	0.103536	0.103536	0	0	0.0255851	0.0188676	0.0198402
S127WTS055	Kober:2015bolivian	-66.1079	-18.1484	1.91847	927	sm	0.27162	0.12367	0.308432	0.308432	0	0	0.109625	0.103368	0.162494
S156WTS004	Reusser:2015landscape	-80.5766	35.7938	1.63384	1206	mt	0.06131	0.00555	0.0755755	0.0755755	0	0	0.0108156	0.0185595	0.0175747
S218WTS002	Matmon:2018namibia	16.0557	-20.4633	1.86522	362	mt	0.03255	0.00535	0.0442695	0.0442695	0	0	0.00814807	0.00932794	0.0105496
S220WTS007	Balco:2013pacific	-123.124	42.4534	1.45832	1485	vb	0.26145	0.18518	0.269904	0.269904	0	0	0.0835623	0.0686464	0.0752169
S023WTS001	Bierman:2005fpuerco	-107.426	35.2575	1.59931	309	ss	0.05523	0.0437367	0.0799644	0.0799644	0	1	0.0201699	0.0166433	0.017664
S148WTS008	Fuchs:2015pamir	72.8839	37.0511	1.54353	391	mt	0.40891	0.73767	0.442975	0.442975	0	0	0.220214	0.305369	0.251059
S137WTS003	Molliex:2016lion	6.11491	45.2097	1.34296	1592	sc	0.39303	0.95841	0.398979	0.398979	0	0	0.198877	0.269706	0.226685
S071WTS020	Henck:2011three	95.6506	32.1145	1.61215	871	sm	0.33716	0.132795	0.344519	0.344519	0	1	0.11641	0.125867	0.487764
S137WTS004	Molliex:2016lion	6.24897	44.2744	1.35146	1127	sc	0.31038	0.35722	0.321449	0.321449	0	0	0.118278	0.154932	0.118588
S235WTS003	Collignon:2019zagros	53.2317	28.7551	1.65299	428	sc	0.15499	0.1535	0.185226	0.185226	0	0	0.0535262	0.0903368	0.0537093
S164WTS076	Mandal:2015indian	76.3299	12.3297	1.83886	1460	mt	0.05756	0.00927	0.0707387	0.0707387	0	0	0.0105677	0.01244	0.0145852
S156WTS007	Reusser:2015landscape	-82.8921	34.2987	1.5548	1344	mt	0.06069	0.01146	0.0733866	0.0733866	0	0	0.0108123	0.0168294	0.0169965
S111WTS009	Olen:2015arun	86.2736	27.7034	1.66125	2347	mt	0.49227	0.93812	0.481788	0.481788	0	0	0.259283	0.268536	0.439384
S074WTS003	Wittmann:2011napo	-77.4708	-0.599247	1.79988	3756	ss	0.2023	0.587755	0.225558	0.225558	0	1	0.0856005	0.0926192	0.112143
S206WTS001	Val:2018andes	-69.3735	-28.9819	1.55143	358	pa	0.23637	0.03935	0.243958	0.243958	0	0	0.107216	0.0472721	0.100998
S120WTS010	Regard:2016cameroon	12.106	3.71365	1.7684	1682	mt	0.05826	0.004865	0.0712904	0.0712904	0	1	0.00817365	0.0127872	0.0246286
S148WTS005	Fuchs:2015pamir	74.403	37.9247	1.3905	248	sc	0.26693	0.04252	0.289553	0.289553	0	0	0.0828345	0.106364	0.0648452
S045WTS011	Finnegan:2008namche	93.3494	29.9545	1.51605	1127	ss	0.5282	0.2273	0.523987	0.523987	0	0	0.224325	0.368081	0.257492
S009WTS029	Schaller:2001european	5.37189	49.223	1.13996	1060	sc	0.01715	0.01663	0.0810531	0.0810531	0	0	0.0128815	0.0136646	0.0139252
S148WTS009	Fuchs:2015pamir	73.0431	37.0669	1.38152	370	mt	0.40096	0.58939	0.433381	0.433381	0	0	0.213848	0.294769	0.241487
S220WTS009	Balco:2013pacific	-123.073	43.2245	1.21021	1556	ss	0.26556	0.09873	0.278887	0.278887	0	0	0.0689835	0.0877879	0.0644858
S156WTS010	Reusser:2015landscape	-84.4662	33.8597	0.866051	1421	mt	0.06096	0.00915	0.0758236	0.0758236	0.127759	0	0.00967867	0.0199946	0.0169772
S009WTS025	Schaller:2001european	9.17118	48.571	0.681627	952	sm	0.05021	0.10493	0.113325	0.113325	0.150279	0	0.0222347	0.0246929	0.0205103
S135WTS021	Struth:2016colombia	-73.1243	6.12906	1.64624	2019	sm	0.27643	0.16489	0.292853	0.292853	0	0	0.133993	0.0960079	0.182487
S274WTS010	Matmon:2020alaska	-152.499	61.8324	0.776458	1291	ss	0.35577	1.06136	0.385178	0.385178	0.416117	0	0.121226	0.992394	0.163532
S134WTS004	West:2014dilution	103.347	32.3064	1.36099	1250	ss	-9.99999	0.726233	0.50686	0.50686	0	0	0.211738	0.255806	0.28539
S235WTS004	Collignon:2019zagros	53.2861	28.8554	1.39876	445	sc	0.15352	0.0494275	0.182488	0.182488	0	1	0.0551066	0.0860135	0.0535185
S258WTS002	Fisher:2020magdalena	-75.7519	2.5023	1.5769	2222	pi	0.27375	0.12754	0.296831	0.296831	0	0	0.101791	0.108942	0.104713
S124WTS002	Carretier:2015chilean	-71.3604	-38.1822	0.78361	2451	vb	0.28287	0.06619	0.303725	0.303725	0.344426	0	0.112945	0.0908034	0.0997732
S188WTS025	Reber:2017peruvian	-77.8514	-8.89144	0.976843	1105	sm	0.36336	0.06901	0.398706	0.398706	0.456544	0	0.23471	0.184089	0.571326
S009WTS050	Schaller:2001european	3.36583	45.2331	0.693267	1029	mt	0.13704	0.05654	0.152641	0.152641	0.182001	0	0.0409869	0.0284358	0.0328092
S156WTS001	Reusser:2015landscape	-79.5483	37.1526	0.779088	1140	mt	0.08925	0.00501	0.105505	0.105505	0.157528	0	0.0160933	0.0257749	0.0203539
S127WTS056	Kober:2015bolivian	-66.1679	-18.5005	0.916567	860	sm	0.2748	0.17081	0.311333	0.311333	0.376332	0	0.108772	0.100197	0.139359
S274WTS014	Matmon:2020alaska	-147.214	63.3763	0.429108	1175	ss	0.2318	0.36325	0.252024	0.252024	0.274954	0	0.073484	0.756614	0.103291
S074WTS013	Wittmann:2011napo	-77.6465	-0.614323	1.57337	3833	ss	0.2274	0.6329	0.25564	0.25564	0	0	0.0986068	0.105875	0.12812
S120WTS009	Regard:2016cameroon	12.2315	3.73099	1.56757	1632	mt	0.05486	0.00288	0.0681937	0.0681937	0	0	0.00609779	0.011766	0.0141524
S091WTS005	Lee:2013patagonian	-71.5523	-50.8146	0.951309	372	ss	0.05582	0.04136	0.0478217	0.0478217	0.0553322	0	0.0126399	0.00459031	0.00844883
S156WTS005	Reusser:2015landscape	-81.2415	35.3256	1.21635	1222	mt	0.06878	0.00495	0.0822699	0.0822699	0	0	0.0132039	0.0200695	0.0188867
S188WTS006	Reber:2017peruvian	-72.0187	-15.6496	1.42793	733	vi	0.22639	0.12778	0.250828	0.250828	0	0	0.140767	0.0876598	0.439763
S009WTS048	Schaller:2001european	3.39033	45.4108	1.03324	1025	mt	0.07389	0.03735	0.141072	0.141072	0	1	0.0379462	0.0263104	0.0302373
S045WTS006	Finnegan:2008namche	94.0471	30.5601	1.26556	1303	ss	0.5563	2.33723	0.476922	0.476922	0	0	0.283507	0.378339	1.01529
S148WTS010	Fuchs:2015pamir	73.3044	37.138	1.12282	337	pa	0.3802	0.72218	0.410159	0.410159	0	0	0.191789	0.25957	0.211057
S091WTS007	Lee:2013patagonian	-72.7477	-49.5412	0.911139	1618	ss	0.20684	0.1071	0.74549	0.74549	0.231405	0	0.0910952	0.125683	0.0802898
S126WTS002	Carretier:2015differences	-73.0845	-15.2283	1.3302	1053	vi	0.28138	0.243591	0.290846	0.290846	0	1	0.180679	0.102734	0.45449
S026WTS020	Reuter:2005susquehanna	-77.2446	42.1231	0.708402	1034	ss	0.11595	0.06921	0.126236	0.126236	0.157706	0	0.0251451	0.016058	0.0184774
S025WTS016	Safran:2005bolivian	-68.5263	-15.2644	0.91769	1944	sm	0.40419	0.13242	0.429373	0.429373	0.49915	0	0.192987	0.178609	0.27407
S025WTS047	Safran:2005bolivian	-67.5793	-16.6846	0.880492	1466	sm	0.44934	0.36202	0.480748	0.480748	0.544335	0	0.251829	0.202145	0.337532
S026WTS011	Reuter:2005susquehanna	-78.4683	40.071	0.206144	1072	ss	0.12881	0.00905	0.137303	0.137303	0.17532	0	0.0255916	0.0257201	0.0212305
S188WTS015	Reber:2017peruvian	-75.6609	-13.1903	0.260768	824	vi	0.35448	0.08581	0.402866	0.402866	0.456268	0	0.211291	0.172842	0.319312
S086WTS018	Godard:2012marsyandi	84.2392	28.6518	0.234332	2195	mt	0.59891	4.53763	0.432751	0.432751	0.643886	1	0.378582	0.315806	1.43969
S082WTS009	Bookhagen:2012andes	-65.8916	-24.338	0.242101	871	mt	0.26832	0.84062	0.277798	0.277798	0.323991	0	0.110141	0.0601793	0.0927549
S076WTS021	Andermann:2011nepal	85.9891	28.1857	0.233467	2566	mt	0.45041	2.61078	0.432939	0.432939	0.504289	0	0.252744	0.213869	0.540466
S235WTS017	Collignon:2019zagros	53.3069	28.9429	1.18604	457	sc	0.15144	0.0512675	0.178231	0.178231	0	1	0.0557855	0.0803309	0.0541201
S038WTS024	Bierman:2007namibian	16.6957	-22.2089	1.23077	306	mt	0.0781	0.00913	0.0889951	0.0889951	0	0	0.0152078	0.021779	0.0167635
S148WTS006	Fuchs:2015pamir	72.7858	37.6729	1.03957	368	pa	0.35253	0.36591	0.379454	0.379454	0	0	0.161056	0.183559	0.167375
S143WTS027	Wittmann:2016po	8.07264	44.549	0.920081	953	sc	0.20305	0.17357	0.23953	0.23953	0.289721	0	0.0648814	0.105554	0.0669411
S218WTS001	Matmon:2018namibia	16.3881	-20.3332	1.20664	408	mt	0.0233	0.00457	0.034462	0.034462	0	0	0.00595185	0.00710462	0.00860857
S136WTS010	Schaller:2016european	-5.37387	42.7672	0.486577	1059	sm	0.17882	0.025245	0.196195	0.196195	0.230656	1	0.0420352	0.0637373	0.0383022
S108WTS020	Portenga:2015bhutanese	89.896	27.8011	0.584456	1273	mt	0.50195	0.56814	0.50837	0.50837	0.578843	0	0.278442	0.355218	0.586518
S094WTS012	Carretier:2013andes	-70.7779	-31.7494	0.560174	595	va	0.35982	0.0566425	0.367523	0.367523	0.411952	1	0.164108	0.0937498	0.16889
S274WTS008	Matmon:2020alaska	-151.801	62.6686	0.301024	1635	ig	0.34565	1.27574	0.370079	0.370079	0.415161	0	0.124926	1.20755	0.181123
S023WTS016	Bierman:2005fpuerco	-107.318	35.7118	0.531755	325	ss	0.09797	0.1084	0.0814722	0.0814722	0.0993412	0	0.0194486	0.0173291	0.0176852
S127WTS015	Kober:2015bolivian	-66.2448	-17.6245	0.621126	1157	sm	0.22937	0.11551	0.263044	0.263044	0.320031	0	0.0873515	0.077517	0.0803252
S156WTS014	Reusser:2015landscape	-83.0462	34.7624	0.535065	1598	mt	0.10206	0.01273	0.117719	0.117719	0.167719	0	0.0198171	0.030568	0.0254186
S105WTS007	Kai:2015qilian	99.2872	38.5422	0.507039	799	su	0.2423	0.35951	0.254903	0.254903	0.291844	0	0.0782807	0.075566	0.0643591
S143WTS013	Wittmann:2016po	7.45977	45.6875	0.44582	1495	mt	0.43658	0.71169	0.471724	0.471724	0.51681	0	0.253921	0.361165	0.303046
S274WTS012	Matmon:2020alaska	-148.054	63.338	0.283974	963	ss	0.15499	1.00875	0.168336	0.168336	0.182649	0	0.0448315	0.369835	0.059379
S156WTS009	Reusser:2015landscape	-84.0057	33.5155	0.527324	1280	mt	0.03984	0.0087	0.0506203	0.0506203	0.1033	0	0.00558125	0.00959802	0.0109547
S071WTS030	Henck:2011three	97.2056	30.3853	0.544847	884	sm	0.30822	0.03714	0.314559	0.314559	0.349033	0	0.0868579	0.0828667	0.0707327
S076WTS001	Andermann:2011nepal	85.3066	28.3232	0.555417	2218	mt	0.50463	1.58571	0.483479	0.483479	0.573726	0	0.279626	0.298801	0.466884
S008WTS003	Bierman:2001namib	16.241	-22.9769	0.577417	250	mt	0.13264	0.00703	0.153316	0.153316	0.213882	0	0.0259841	0.0488789	0.0291482
S274WTS016	Matmon:2020alaska	-146.009	63.1925	0.282817	1089	vb	0.1868	0.88693	0.209365	0.209365	0.217926	0	0.0561773	0.491858	0.0777701
S082WTS015	Bookhagen:2012andes	-66.2775	-26.8256	0.552968	686	mt	0.18969	0.05179	0.203641	0.203641	0.24487	0	0.0872329	0.0515272	0.0838202
S143WTS031	Wittmann:2016po	8.67301	46.0838	0.890931	1922	mt	0.39329	0.66173	0.438896	0.438896	0.476039	0	0.209072	0.355741	0.252226
S220WTS003	Balco:2013pacific	-123.431	39.9439	0.977752	1694	ss	0.26354	0.45462	0.278946	0.278946	0.320412	0	0.0917816	0.0721262	0.0782589
S082WTS014	Bookhagen:2012andes	-66.2609	-25.4282	1.14025	712	vi	0.25064	0.08299	0.26619	0.26619	0	0	0.116515	0.0641687	0.115455
S256WTS009	Starke:2020vegetation	-71.9367	-15.5276	1.20608	859	vi	0.25529	0.12408	0.263875	0.263875	0	0	0.151696	0.0941094	0.508671
S076WTS004	Andermann:2011nepal	85.0849	28.339	1.0942	2355	mt	0.53454	2.85482	0.484479	0.484479	0	1	0.304606	0.305531	0.693852
S070WTS013	Palumbo:2010tibet	99.7721	38.3887	0.972432	758	ss	0.3058	0.297368	0.318996	0.318996	0.373073	1	0.116816	0.143342	0.630127
S123WTS001	Carretier:2015heterogeneous	-73.0961	-15.134	1.17618	1161	vi	0.28302	0.27374	0.291533	0.291533	0	0	0.180509	0.104414	0.461279
S026WTS007	Reuter:2005susquehanna	-78.0174	40.3822	0.920394	1104	ss	0.13611	0.01906	0.142385	0.142385	0.153715	0	0.0282494	0.0255309	0.0231286
S133WTS014	Gonzalez:2016background	-49.703	-27.0422	1.06826	1732	ss	0.17892	0.01826	0.198756	0.198756	0	0	0.0454006	0.061323	0.0436876
S188WTS007	Reber:2017peruvian	-71.593	-16.2154	1.14248	372	su	0.14643	0.03389	0.167717	0.167717	0	0	0.0824434	0.0403736	0.170964
S120WTS008	Regard:2016cameroon	12.4656	3.92218	1.17232	1606	mt	0.05091	0.00337	0.0631522	0.0631522	0	0	0.00581107	0.0105985	0.0126809
S016WTS003	Vance:2003himalaya	79.5165	30.4999	0.994501	2047	mt	0.56703	2.53644	0.493352	0.493352	0.644918	0	0.313388	0.346259	0.588985
S102WTS007	Li:2014tibetan	95.8007	35.5354	0.937847	395	ss	0.14488	0.07874	0.150163	0.150163	0.180876	0	0.039074	0.0407289	0.0340865
S143WTS030	Wittmann:2016po	8.65049	46.1597	0.789322	2034	mt	0.44246	0.67736	0.478358	0.478358	0.519881	0	0.228704	0.389355	0.275689
S136WTS007	Schaller:2016european	3.33067	45.3198	0.799197	1010	mt	0.12864	0.04985	0.152917	0.152917	0.165548	0	0.0409498	0.0285209	0.0328148
S230WTS020	Grin:2018tajikistan	72.5377	39.5455	0.870068	668	sm	0.30438	0.9834	0.336428	0.336428	0.378329	0	0.1283	0.173828	0.126476
S220WTS002	Balco:2013pacific	-123.382	39.8672	0.858587	1671	ss	0.26548	0.43612	0.278567	0.278567	0.322503	0	0.0917175	0.0715467	0.0780781
S188WTS005	Reber:2017peruvian	-70.8504	-16.5457	1.06855	484	vi	0.23802	0.08981	0.268011	0.268011	0	0	0.131356	0.0799396	0.306601
S009WTS059	Schaller:2001european	4.08532	45.3805	0.757701	1003	pa	0.11573	0.04541	0.131702	0.131702	0.143127	0	0.0332043	0.0245522	0.0279376
S045WTS005	Finnegan:2008namche	95.7922	30.0258	0.932269	1549	pa	0.5532	1.71691	0.537406	0.537406	0.621301	0	0.299355	0.440655	0.374974
S008WTS006	Bierman:2001namib	15.5545	-21.4313	1.00101	244	pa	0.04423	0.00132	0.0501857	0.0501857	0	0	0.0133089	0.00962143	0.0132565
S038WTS025	Bierman:2007namibian	16.8325	-22.2048	0.993352	324	mt	0.0803	0.0108	0.0920249	0.0920249	0.115375	0	0.0149877	0.0225343	0.0171023
S023WTS008	Bierman:2005fpuerco	-107.83	35.1804	0.504944	306	ss	0.06618	0.05078	0.0935079	0.0935079	0.104989	0	0.0246409	0.0188807	0.0202968
S108WTS045	Portenga:2015bhutanese	89.8924	27.8348	0.546049	1215	mt	0.50428	0.677018	0.510051	0.510051	0.580288	1	0.277925	0.363594	0.568178
S059WTS014	Abbuehl:2010peruvian	-80.0314	-5.18733	0.611399	760	su	0.02525	0.01831	0.202078	0.202078	0.23549	0	0.0781225	0.0604678	0.0765065
S038WTS017	Bierman:2007namibian	15.9016	-21.2983	0.571947	316	pa	0.0529	0.00838	0.058684	0.058684	0.0609743	0	0.011861	0.011347	0.0111771
S274WTS017	Matmon:2020alaska	-145.224	62.8686	0.276697	897	vb	0.06977	3.93421	0.090974	0.090974	0.0951989	0	0.0248587	0.171044	0.032115
S111WTS008	Olen:2015arun	87.7573	27.3995	0.537425	2929	mt	0.50659	1.70653	0.509154	0.509154	0.576619	0	0.284666	0.293166	0.371009
S009WTS017	Schaller:2001european	8.91941	48.4035	0.395901	951	sm	0.09787	0.0788525	0.110535	0.110535	0.118997	1	0.0221383	0.0252465	0.0207173
S235WTS006	Collignon:2019zagros	53.7927	28.8853	0.520343	361	sc	0.13145	0.0135275	0.158567	0.158567	0.193762	1	0.0453278	0.0777176	0.0426418
S133WTS008	Gonzalez:2016background	-42.2027	-20.9919	0.548212	1477	mt	0.22165	0.01186	0.236357	0.236357	0.288518	0	0.0336258	0.087557	0.0427413
S156WTS011	Reusser:2015landscape	-79.8435	37.1289	0.46797	1127	mt	0.10915	0.0052	0.127439	0.127439	0.149012	0	0.0195766	0.0337999	0.0238453
S023WTS017	Bierman:2005fpuerco	-107.336	35.7437	0.471907	322	ss	0.10711	0.10652	0.0780253	0.0780253	0.0897367	0	0.0177581	0.0163313	0.0166643
S207WTS032	Stutenbecker:2018rhone	7.80468	46.253	0.399573	1655	mt	0.46519	0.1782	0.499079	0.499079	0.540558	0	0.30204	0.383383	0.369097
S094WTS015	Carretier:2013andes	-70.093	-33.705	0.480334	1428	va	0.50236	0.25722	0.504966	0.504966	0.552254	0	0.279476	0.288651	0.3315
S023WTS010	Bierman:2005fpuerco	-107.861	35.1784	0.469278	305	ss	0.08598	0.04291	0.0931222	0.0931222	0.104705	0	0.0237456	0.0189552	0.0194121
S038WTS036	Bierman:2007namibian	16.0442	-21.7486	0.531443	264	pa	0.045	0.00522	0.0461753	0.0461753	0.0460307	0	0.0105748	0.011755	0.0105712
S076WTS013	Andermann:2011nepal	85.3317	28.3846	0.499021	2193	mt	0.51769	1.71649	0.491255	0.491255	0.580439	0	0.296169	0.314074	0.50574
S082WTS028	Bookhagen:2012andes	-65.4382	-23.3554	0.520555	1047	su	0.28369	0.0278	0.295631	0.295631	0.333834	0	0.124732	0.066464	0.123999
S235WTS010	Collignon:2019zagros	52.7862	29.1163	0.492946	575	sc	0.16364	0.0708	0.192763	0.192763	0.236864	1	0.0657327	0.0819299	0.0598721
S133WTS016	Gonzalez:2016background	-49.7822	-27.3102	0.49946	1722	ss	0.16652	0.01717	0.185393	0.185393	0.22836	0	0.0422487	0.0602777	0.0399137
S186WTS007	Portenga:2019potomac	-78.8565	38.3638	0.436255	1097	sc	0.11875	0.00545	0.140188	0.140188	0.157246	0	0.0275938	0.0300827	0.0243873
S102WTS004	Li:2014tibetan	93.8972	35.8775	0.448321	385	ss	0.26617	0.02725	0.273104	0.273104	0.313078	0	0.0851479	0.0814889	0.0662528
S143WTS012	Wittmann:2016po	7.39572	45.7275	0.383848	1578	mt	0.47921	0.76591	0.516825	0.516825	0.56051	0	0.283235	0.40437	0.340458
S137WTS009	Molliex:2016lion	4.22954	44.4474	0.383585	1358	sc	0.20007	0.08822	0.246029	0.246029	0.285181	0	0.0674949	0.0676934	0.088725
S059WTS013	Abbuehl:2010peruvian	-79.9546	-5.22096	0.521538	842	su	0.09832	0.01285	0.229801	0.229801	0.268383	0	0.0898302	0.0696338	0.0876767
S076WTS002	Andermann:2011nepal	84.862	28.4452	0.460417	2465	mt	0.59004	2.99853	0.498605	0.498605	0.646729	0	0.364818	0.323835	1.04531
S010WTS030	Kirchner:2001mountain	-114.96	46.4122	0.357513	1403	pa	0.32506	0.11029	0.340853	0.340853	0.380612	0	0.119704	0.0828679	0.108509
S104WTS025	Scherler:2013garhwal	77.9601	31.0825	0.441428	1818	mt	0.5232	1.21781	0.541354	0.541354	0.598682	0	0.258126	0.326596	0.317902
S134WTS003	West:2014dilution	103.048	31.577	0.438336	1309	ss	-9.99999	0.659197	0.617716	0.617716	0.683606	0	0.32702	0.429561	0.443232
S188WTS017	Reber:2017peruvian	-75.8749	-12.5955	0.502003	908	vi	0.38441	0.0631267	0.425992	0.425992	0.486108	1	0.232824	0.219577	0.406601
S009WTS001	Schaller:2001european	12.8165	49.1485	0.334204	1056	mt	0.07595	0.02344	0.13123	0.13123	0.143979	0	0.0320147	0.0225918	0.0232243
S025WTS013	Safran:2005bolivian	-68.7203	-15.4175	0.491775	1836	sm	0.4782	0.20597	0.499995	0.499995	0.560887	0	0.26877	0.213446	0.393328
S016WTS002	Vance:2003himalaya	79.7292	30.6949	0.436909	1851	mt	0.58109	3.95169	0.452828	0.452828	0.656275	0	0.336016	0.412912	0.850275
S258WTS008	Fisher:2020magdalena	-75.7469	3.43173	0.503654	3260	pi	0.40558	0.21144	0.429253	0.429253	0.507631	0	0.168528	0.18921	0.202139
S256WTS004	Starke:2020vegetation	-70.5759	-17.3278	0.479215	257	su	0.19857	0.02323	0.21663	0.21663	0.265481	0	0.100336	0.0599311	0.151493
S009WTS049	Schaller:2001european	3.64222	45.6433	0.182185	1099	pa	0.12746	0.0342875	0.150337	0.150337	0.1628	1	0.0418809	0.0282674	0.0322107
S120WTS007	Regard:2016cameroon	11.6444	3.11569	0.258127	1678	mt	0.05678	0.0022875	0.0753187	0.0753187	0.0861432	1	0.00463658	0.0134729	0.0131964
S143WTS004	Wittmann:2016po	8.95966	46.409	0.178234	2146	mt	0.52589	0.85596	0.56937	0.56937	0.614607	0	0.316137	0.554897	0.389945
S021WTS018	vonBlanckenburg:2004tropical	80.7558	7.09582	0.256402	2235	mt	0.29445	0.02092	0.251525	0.251525	0.301481	0	0.0813245	0.0777073	0.0807393
S188WTS021	Reber:2017peruvian	-76.8448	-11.3223	0.252949	697	vi	0.36837	0.09738	0.419154	0.419154	0.483017	0	0.208639	0.152481	0.291111
S094WTS016	Carretier:2013andes	-70.2791	-34.3552	0.211851	1802	py	0.52216	0.19414	0.518202	0.518202	0.578235	0	0.296589	0.401238	0.35269
S025WTS006	Safran:2005bolivian	-68.7737	-15.5772	0.247139	1621	sm	0.44652	0.19729	0.468008	0.468008	0.523637	0	0.275167	0.165775	0.375924
S025WTS046	Safran:2005bolivian	-67.7175	-16.3964	0.123505	1999	sm	0.49531	0.81713	0.559204	0.559204	0.629495	0	0.326795	0.311694	0.4661
S025WTS020	Safran:2005bolivian	-67.9557	-16.0304	0.123359	2881	sm	0.5501	0.33365	0.56251	0.56251	0.644331	0	0.27352	0.34195	0.448175
S143WTS025	Wittmann:2016po	7.83547	46.0805	0.0886097	1564	mt	0.48898	1.58018	0.526933	0.526933	0.57188	1	0.349348	0.505529	0.480775
S188WTS041	Reber:2017peruvian	-69.5885	-18.5146	0.12109	453	va	0.24157	0.02012	0.274017	0.274017	0.319651	0	0.138337	0.0669795	0.192699
S188WTS030	Reber:2017peruvian	-79.469	-6.40125	0.126552	796	su	0.26313	0.0226	0.364077	0.364077	0.34122	0	0.176163	0.131633	0.195113
S104WTS021	Scherler:2013garhwal	78.2422	30.8912	0.108872	2055	mt	0.4991	0.3015	0.523794	0.523794	0.573256	0	0.231345	0.330097	0.262133
S057WTS011	Delunel:2010pelvoux	6.18322	44.7329	0.0898159	1599	mt	0.42048	0.52452	0.479182	0.479182	0.522223	0	0.218003	0.418073	0.222133
S230WTS022	Grin:2018tajikistan	72.3247	39.055	0.687806	1029	vi	0.47996	1.86178	0.519994	0.519994	0.589616	0	0.269039	0.429497	0.323668
S156WTS008	Reusser:2015landscape	-83.4648	33.6682	0.734638	1249	mt	0.0396	0.00744	0.0506569	0.0506569	0.0562279	0	0.00570903	0.00964517	0.0114595
S127WTS052	Kober:2015bolivian	-65.0144	-17.9773	0.836401	920	sm	0.2555	0.0297	0.295072	0.295072	0.363987	0	0.087499	0.0960654	0.0801842
S230WTS021	Grin:2018tajikistan	71.0874	38.8018	0.680008	1235	sm	0.44902	1.6769	0.49396	0.49396	0.562797	0	0.233298	0.342968	0.25913
S023WTS007	Bierman:2005fpuerco	-107.252	35.5873	0.703795	321	ss	0.04956	0.09836	0.0784949	0.0784949	0.0907565	0	0.018833	0.0163643	0.0168757
S207WTS034	Stutenbecker:2018rhone	7.58098	46.2064	0.595866	1668	mt	0.46294	1.60309	0.497374	0.497374	0.538003	0	0.292515	0.405711	0.356342
S023WTS006	Bierman:2005fpuerco	-107.704	35.0981	0.703575	305	ss	0.06811	0.0647	0.0874411	0.0874411	0.0980252	0	0.022945	0.0178206	0.0197351
S140WTS010	Abrahami:2016sikkim	88.4531	27.5019	0.748176	3378	mt	0.44733	1.61933	0.485425	0.485425	0.574484	0	0.294612	0.272498	0.430615
S156WTS002	Reusser:2015landscape	-79.869	36.5473	0.674365	1195	mt	0.07044	0.00552	0.0880525	0.0880525	0.105321	0	0.0117406	0.0216516	0.0174726
S061WTS009	Insel:2010bolivian	-64.3678	-19.6471	0.338637	914	sm	0.31993	0.127195	0.343664	0.343664	0.418207	1	0.102396	0.146735	0.098264
S010WTS029	Kirchner:2001mountain	-115.646	45.788	0.249374	1227	mt	0.23216	0.04053	0.259632	0.259632	0.293195	0	0.0842253	0.0606192	0.0812834
S188WTS032	Reber:2017peruvian	-78.6978	-7.62914	0.354312	691	sm	0.36772	0.0523	0.417623	0.417623	0.494197	0	0.185394	0.190277	0.20503
S038WTS030	Bierman:2007namibian	17.1868	-21.9367	0.329499	349	mt	0.0439	0.00728	0.0522932	0.0522932	0.0605831	0	0.00801659	0.0103051	0.0101953
S048WTS006	Kober:2009lluta	-69.6171	-18.0105	0.217445	477	py	0.26563	0.0215111	0.218478	0.218478	0.246582	1	0.115367	0.0487796	0.176932
S273WTS006	Konyana:2020mpumalanga	30.1087	-26.6976	0.204065	758	ss	0.04912	0.0032475	0.0523824	0.0523824	0.0537415	1	0.00965925	0.00391767	0.00727342
S140WTS009	Abrahami:2016sikkim	88.209	27.2899	0.200883	3878	mt	0.46137	0.65005	0.499224	0.499224	0.582726	0	0.28555	0.205545	0.359577
S086WTS022	Godard:2012marsyandi	84.2055	28.6894	0.196182	1971	mt	0.58527	5.48704	0.436742	0.436742	0.630626	0	0.353544	0.338349	1.36304
S108WTS027	Portenga:2015bhutanese	90.0774	27.9374	0.197371	1277	mt	0.50157	1.07601	0.493225	0.493225	0.582369	0	0.284216	0.407446	0.74923
S273WTS002	Konyana:2020mpumalanga	30.0287	-26.019	0.200133	720	ss	0.0463	0.00206	0.0495019	0.0495019	0.0501795	0	0.0125565	0.00346829	0.00789535
S094WTS011	Carretier:2013andes	-70.8881	-31.4981	0.18854	582	pi	0.3584	0.0472	0.368731	0.368731	0.414785	0	0.160568	0.0966789	0.167029
S076WTS020	Andermann:2011nepal	86.004	28.2623	0.191831	2362	mt	0.43059	0.83003	0.405102	0.405102	0.478027	FALSE	0.227907	0.203118	0.509998
S094WTS019	Carretier:2013andes	-70.7541	-35.3395	0.176487	2199	va	0.33877	0.17507	0.350862	0.350862	0.394158	FALSE	0.153698	0.166854	0.182322
S159WTS006	Acosta:201vegetation	35.2802	0.472418	0.215896	1472	vi	0.04516	0.00269	0.0531963	0.0531963	0.0544324	FALSE	0.0148266	0.00511731	0.0109088
S149WTS021	Gonzalez:2016panamanian	-80.9439	8.32253	0.211826	3267	vi	0.13831	0.0462	0.148768	0.148768	0.187731	FALSE	0.0362073	0.0409562	0.0315084
S226WTS002	Tofelde:2018hillslope	-65.9061	-24.2753	0.194377	843	mt	0.25419	0.02455	0.263423	0.263423	0.305123	TRUE	0.0988569	0.0540826	0.07959
S151WTS013	Derrieux:2014taiwan	121.052	23.7571	0.193972	3945	ss	0.53669	1.33224	0.564215	0.564215	0.630142	FALSE	0.227348	0.33575	0.29001
S108WTS006	Portenga:2015bhutanese	89.6638	27.9532	0.186671	920	mt	0.5281	0.63144	0.536503	0.536503	0.595381	FALSE	0.28849	0.389372	0.475638
S082WTS004	Bookhagen:2012andes	-65.0565	-23.5466	0.192817	1658	sm	0.44587	0.44342	0.470181	0.470181	0.548099	FALSE	0.196731	0.270606	0.247959
S135WTS004	Struth:2016colombia	-73.9713	4.33633	0.20863	2645	sm	0.35465	0.47041	0.370355	0.370355	0.416784	FALSE	0.196485	0.135958	0.226961
S074WTS010	Wittmann:2011napo	-77.7755	-0.882474	0.839131	4449	ss	0.227	0.39236	0.252992	0.252992	0.29671	FALSE	0.0949971	0.101895	0.128076
S016WTS004	Vance:2003himalaya	78.7758	30.83	0.720111	2012	mt	0.51714	1.58718	0.509046	0.509046	0.594259	FALSE	0.261635	0.356837	0.443889
S038WTS027	Bierman:2007namibian	16.9689	-22.1278	0.773088	343	mt	0.0695	0.00853	0.0803118	0.0803118	0.100728	FALSE	0.0125596	0.0195272	0.0149398
S094WTS002	Carretier:2013andes	-70.1903	-29.0663	0.726919	481	pa	0.41336	0.0590852	0.421315	0.421315	0.462697	TRUE	0.220872	0.0783827	0.255404
S201WTS009	Heineke:2017reservoir	28.0648	38.1823	0.161091	717	mt	0.20003	0.09638	0.205667	0.205667	0.246107	FALSE	0.0666045	0.0479812	0.0522041
S273WTS001	Konyana:2020mpumalanga	30.3701	-25.0162	0.185561	701	sm	0.15682	0.00684	0.161578	0.161578	0.180202	FALSE	0.0524571	0.0251647	0.0404891
S123WTS014	Carretier:2015heterogeneous	-69.7016	-19.1702	0.192125	163	su	0.20203	0.07672	0.222329	0.222329	0.265579	FALSE	0.110266	0.0506285	0.135987
S137WTS013	Molliex:2016lion	2.43973	42.594	0.148798	912	sm	0.28509	0.16768	0.304818	0.304818	0.34443	FALSE	0.113072	0.082714	0.109348
S136WTS012	Schaller:2016european	-5.09497	42.8646	0.147949	1293	sm	0.23468	0.04214	0.250694	0.250694	0.291792	FALSE	0.0542646	0.0980115	0.0503088
S188WTS018	Reber:2017peruvian	-76.2375	-12.2704	0.194006	753	vi	0.39151	0.06288	0.43669	0.43669	0.492115	FALSE	0.240058	0.215573	0.351031
S143WTS022	Wittmann:2016po	9.78772	44.5653	0.14144	1215	sc	0.22658	0.60808	0.250603	0.250603	0.289933	FALSE	0.0807793	0.0574301	0.0551469
S188WTS024	Reber:2017peruvian	-77.5439	-10.2742	0.193393	658	vi	0.37373	0.03364	0.421841	0.421841	0.487375	FALSE	0.195481	0.144684	0.235138
S156WTS019	Reusser:2015landscape	-81.3422	36.1542	0.158323	1325	mt	0.15653	0.00862	0.179284	0.179284	0.211279	FALSE	0.0296197	0.0536225	0.0321677
S165WTS038	Cyr:2014distinguishing	11.0179	44.1793	0.0752056	1048	sc	0.27435	0.57443	0.310242	0.310242	0.362918	FALSE	0.0861472	0.102152	0.0703009
S257WTS018	Butler:2007orange	27.5221	-28.9351	0.0917465	736	ss	0.06281	0.00774	0.0683902	0.0683902	0.0727846	FALSE	0.0120414	0.00884574	0.00885057
S135WTS010	Struth:2016colombia	-73.4057	5.31593	0.104183	1526	sm	0.22487	0.05831	0.240477	0.240477	0.282798	FALSE	0.107643	0.0648721	0.092419
S127WTS024	Kober:2015bolivian	-66.2092	-18.9056	0.0988847	816	sm	0.17988	0.05143	0.205167	0.205167	0.24453	FALSE	0.0635882	0.0499138	0.0560541
S140WTS005	Abrahami:2016sikkim	88.3348	27.85	0.0923194	2691	mt	0.37037	1.80877	0.408627	0.408627	0.491253	FALSE	0.215376	0.318069	0.385592
S127WTS003	Kober:2015bolivian	-65.2897	-18.884	0.0978778	691	sm	0.28246	0.03342	0.333147	0.333147	0.423009	FALSE	0.0790118	0.116189	0.0733259
S143WTS014	Wittmann:2016po	7.4239	45.4671	0.0724167	1510	mt	0.50996	0.40313	0.56114	0.56114	0.611388	FALSE	0.267616	0.460643	0.322246
S037WTS029	Wittmann:2007switzerland	8.06547	45.8393	0.0716608	1775	mt	0.56901	0.4034	0.591074	0.591074	0.649985	FALSE	0.235263	0.487367	0.258711
S127WTS006	Kober:2015bolivian	-65.4254	-17.6608	0.0978181	1739	sm	0.24035	0.00659	0.266628	0.266628	0.318862	FALSE	0.0923916	0.0623598	0.0856396
S220WTS005	Balco:2013pacific	-123.89	41.0601	0.0772465	1943	mt	0.28231	0.48013	0.288526	0.288526	0.327871	TRUE	0.114346	0.0522862	0.0837318
S010WTS031	Kirchner:2001mountain	-114.882	45.9778	0.575686	1141	pa	0.3738	0.09282	0.390542	0.390542	0.437007	FALSE	0.142269	0.101084	0.136968
S108WTS013	Portenga:2015bhutanese	89.9467	27.6956	0.724145	1581	mt	0.50594	0.643132	0.514284	0.514284	0.585305	TRUE	0.279315	0.345912	0.583067
S127WTS057	Kober:2015bolivian	-66.2085	-17.6835	0.777414	1085	sm	0.24732	0.07394	0.283704	0.283704	0.34387	FALSE	0.0945459	0.0896698	0.0911506
S127WTS007	Kober:2015bolivian	-66.2049	-18.5429	0.771717	866	sm	0.26019	0.14788	0.295675	0.295675	0.357513	FALSE	0.102641	0.0941019	0.140247
S009WTS058	Schaller:2001european	4.10636	45.2437	0.569476	1001	pa	0.09933	0.05958	0.133488	0.133488	0.145276	FALSE	0.0334005	0.0256375	0.0272459
S023WTS014	Bierman:2005fpuerco	-107.266	35.6271	0.656131	324	ss	0.05052	0.11433	0.080082	0.080082	0.0938464	FALSE	0.0192111	0.0168539	0.0172659
S135WTS022	Struth:2016colombia	-73.4183	5.97124	0.800418	2337	sm	0.23836	0.06333	0.254727	0.254727	0.299959	FALSE	0.103368	0.0845183	0.109329
S207WTS033	Stutenbecker:2018rhone	7.62633	46.204	0.554307	1664	mt	0.469	1.69834	0.501454	0.501454	0.542	FALSE	0.297888	0.406201	0.365176
S258WTS007	Fisher:2020magdalena	-75.6122	3.63606	0.7957	2967	pi	0.353	0.2786	0.375215	0.375215	0.446376	FALSE	0.145114	0.159045	0.173773
S091WTS004	Lee:2013patagonian	-71.2539	-51.4899	0.481873	455	ss	0.02426	0.00858	0.0281159	0.0281159	0.0268125	FALSE	0.00633546	0.00209671	0.00506209
S094WTS003	Carretier:2013andes	-70.154	-29.0927	0.672287	512	pa	0.4267	0.0695322	0.433737	0.433737	0.473827	TRUE	0.231048	0.0794158	0.263643
S258WTS005	Fisher:2020magdalena	-72.8095	6.22426	0.760196	1727	sm	0.31427	0.21684	0.329874	0.329874	0.380193	TRUE	0.157316	0.104115	0.17344
S133WTS007	Gonzalez:2016background	-42.9433	-21.3445	0.696773	1503	mt	0.18761	0.01589	0.207372	0.207372	0.258971	FALSE	0.0237849	0.0714257	0.0361409
S156WTS006	Reusser:2015landscape	-82.0317	34.4079	0.616311	1250	mt	0.04694	0.00497	0.0583728	0.0583728	0.0636681	FALSE	0.00830338	0.012993	0.0139056
S038WTS014	Bierman:2007namibian	15.7879	-21.303	0.693856	295	pa	0.0492	0.00803	0.0542022	0.0542022	0.0580497	FALSE	0.0116896	0.010152	0.0109769
S071WTS025	Henck:2011three	96.3657	31.356	0.634527	917	sm	0.39637	0.05924	0.41009	0.41009	0.460847	FALSE	0.126774	0.12278	0.150472
S156WTS016	Reusser:2015landscape	-84.2189	34.122	0.609578	1458	mt	0.06753	0.01005	0.0820596	0.0820596	0.0903765	FALSE	0.0109647	0.020892	0.0176205
S009WTS028	Schaller:2001european	5.57187	48.6657	0.483325	1007	sc	0.03144	0.01371	0.075213	0.075213	0.0813578	FALSE	0.0121928	0.00998476	0.0119014
S071WTS032	Henck:2011three	97.2824	30.3037	0.61313	878	sm	0.32425	0.02264	0.331207	0.331207	0.366493	FALSE	0.0962906	0.0877085	0.0853938
S038WTS016	Bierman:2007namibian	15.836	-21.2949	0.641851	304	pa	0.0503	0.00817	0.0550821	0.0550821	0.0583226	FALSE	0.0115187	0.0104049	0.0108175
S009WTS052	Schaller:2001european	3.44817	45.0627	0.470461	1022	mt	0.03648	0.04499	0.162415	0.162415	0.176356	FALSE	0.0431491	0.0301545	0.0353396
S076WTS011	Andermann:2011nepal	85.3312	28.4504	0.438072	2096	mt	0.52634	2.82487	0.493405	0.493405	0.58662	FALSE	0.307832	0.331253	0.543628
S067WTS008	Placzek:2010atacama	-68.9339	-23.6075	0.453512	30	ss	0.0748	0.0003	0.0727715	0.0727715	0.085968	FALSE	0.0337289	0.0133888	0.0292721
S274WTS011	Matmon:2020alaska	-148.022	63.3052	0.221293	953	ss	0.11919	0.19604	0.129058	0.129058	0.136714	FALSE	0.0362654	0.238316	0.0452108
S120WTS001	Regard:2016cameroon	12.9119	4.13766	0.487469	1622	mt	0.04609	0.00202	0.0570438	0.0570438	0.0643632	FALSE	0.00485247	0.00852689	0.0104296
S164WTS001	Mandal:2015indian	76.6679	10.7362	0.478237	1985	mt	0.09799	0.02389	0.109614	0.109614	0.132128	FALSE	0.0288176	0.0427075	0.0339864
S102WTS014	Li:2014tibetan	91.6219	33.6713	0.404101	563	sc	0.11781	0.03488	0.0630684	0.0630684	0.133822	FALSE	0.0281986	0.0225805	0.0196533
S025WTS042	Safran:2005bolivian	-67.7403	-16.8265	0.458698	1187	sm	0.40651	0.374595	0.423391	0.423391	0.491467	TRUE	0.208801	0.172836	0.266621
S061WTS017	Insel:2010bolivian	-63.9563	-20.1285	0.44894	1064	sm	0.27737	0.21295	0.299666	0.299666	0.396521	FALSE	0.0620512	0.153307	0.0843552
S025WTS019	Safran:2005bolivian	-67.7288	-15.9797	0.452793	2473	sm	0.39663	0.1561	0.465832	0.465832	0.542657	FALSE	0.191663	0.23744	0.269605
S207WTS031	Stutenbecker:2018rhone	7.89854	46.2775	0.317724	1727	mt	0.47567	0.946025	0.509926	0.509926	0.550986	TRUE	0.305816	0.400161	0.37882
S116WTS008	Bierman:2014view	23.9301	-33.6954	0.379787	652	ss	0.26093	0.00493	0.31066	0.31066	0.38242	FALSE	0.0736649	0.128905	0.110056
S274WTS005	Matmon:2020alaska	-151.215	62.718	0.209013	2090	ig	0.34079	0.98355	0.375894	0.375894	0.413134	FALSE	0.128319	1.40655	0.200854
S127WTS040	Kober:2015bolivian	-65.3318	-17.9089	0.429704	1043	sm	0.24255	0.01788	0.283284	0.283284	0.352402	FALSE	0.0772125	0.0893046	0.0733022
S188WTS013	Reber:2017peruvian	-74.9024	-14.294	0.436786	578	vi	0.3058	0.04553	0.344022	0.344022	0.404937	FALSE	0.15827	0.0925834	0.208855
S008WTS005	Bierman:2001namib	16.1176	-21.6975	0.41837	278	pa	0.04073	0.00553	0.0474258	0.0474258	0.0469936	FALSE	0.0108349	0.0122224	0.010773
S148WTS007	Fuchs:2015pamir	72.1808	37.2884	0.356859	447	mt	0.38449	0.15576	0.410899	0.410899	0.449055	FALSE	0.200693	0.22538	0.214127
S159WTS007	Acosta:201vegetation	35.0857	0.946314	0.444444	1644	mt	0.07979	0.00448	0.090883	0.090883	0.100333	FALSE	0.0261033	0.0115931	0.0201704
S256WTS001	Starke:2020vegetation	-73.3718	-15.755	0.166569	335	py	0.16705	0.0129	0.183231	0.183231	0.222335	FALSE	0.104749	0.0471132	0.203533
S188WTS037	Reber:2017peruvian	-77.7687	-9.9069	0.170135	733	vi	0.35222	0.0204	0.394342	0.394342	0.455083	FALSE	0.18881	0.133307	0.246985
S086WTS011	Godard:2012marsyandi	84.1446	28.7107	0.150853	1819	mt	0.5633	2.34916	0.434893	0.434893	0.610849	FALSE	0.304842	0.369703	1.15928
S143WTS003	Wittmann:2016po	8.85639	46.4496	0.118175	2209	mt	0.52013	1.01041	0.55954	0.55954	0.600608	FALSE	0.307873	0.480377	0.376844
S171WTS001	Garcin:2017kenya	36.6776	1.61655	0.17144	603	vi	0.11326	0.00882	0.133632	0.133632	0.160442	FALSE	0.0396711	0.0326912	0.0352968
S135WTS020	Struth:2016colombia	-73.0475	6.2639	0.170101	2560	sm	0.32701	0.04578	0.346175	0.346175	0.404771	FALSE	0.137208	0.120843	0.132031
S127WTS046	Kober:2015bolivian	-63.7545	-19.5897	0.158975	941	sm	0.20691	0.2347	0.271081	0.271081	0.387728	FALSE	0.0449833	0.150745	0.0580777
S026WTS014	Reuter:2005susquehanna	-76.1876	40.1445	0.128141	1175	sc	0.05494	0.01881	0.0571132	0.0571132	0.0626586	FALSE	0.00718194	0.0085141	0.0100688
S137WTS012	Molliex:2016lion	2.59449	42.8127	0.121931	810	sc	0.19563	0.06964	0.21762	0.21762	0.265812	FALSE	0.0496328	0.0664765	0.0439606
S182WTS036	Schmidt:2016yunnan	100.838	23.9295	0.15121	1400	ss	0.33781	0.10213	0.366604	0.366604	0.460379	FALSE	0.0941742	0.133753	0.087751
S207WTS027	Stutenbecker:2018rhone	8.14078	46.4252	0.114011	2145	mt	0.46867	1.72928	0.503561	0.503561	0.542177	FALSE	0.267062	0.358612	0.315736
S121WTS012	Dixon:2016alps	14.8239	46.874	0.112553	1059	mt	0.24904	0.07169	0.265074	0.265074	0.293153	FALSE	0.0946679	0.0578123	0.0744984
S143WTS011	Wittmann:2016po	8.12348	45.7951	0.114276	1769	mt	0.45213	0.18693	0.507862	0.507862	0.565561	FALSE	0.186632	0.365447	0.199549
S230WTS019	Grin:2018tajikistan	71.2919	39.4158	0.126095	850	sm	0.47206	1.48734	0.527126	0.527126	0.602966	FALSE	0.250856	0.452471	0.30916
S071WTS009	Henck:2011three	98.6715	31.9703	0.137882	1010	ss	0.48045	0.099465	0.488599	0.488599	0.557986	TRUE	0.181187	0.207929	0.248411
S023WTS029	Bierman:2005fpuerco	-107.634	35.5187	0.131998	302	ss	0.05474	0.06363	0.0773435	0.0773435	0.0850608	FALSE	0.0188602	0.0152787	0.0167052
S082WTS006	Bookhagen:2012andes	-65.8725	-24.231	0.147869	939	mt	0.24722	0.0291363	0.255407	0.255407	0.295956	TRUE	0.0961504	0.0527647	0.075786
S038WTS018	Bierman:2007namibian	16.0903	-21.3072	0.330609	341	pa	0.0576	0.00876	0.0618735	0.0618735	0.0656874	FALSE	0.0121312	0.0109323	0.0111439
S164WTS067	Mandal:2015indian	77.4473	12.8397	0.345606	855	mt	0.05285	0.02404	0.0641443	0.0641443	0.0725036	FALSE	0.0111929	0.0110209	0.0138051
S116WTS003	Bierman:2014view	22.8762	-33.1883	0.295591	250	ss	0.05602	0.00407	0.0666073	0.0666073	0.0787915	FALSE	0.0141719	0.0148268	0.0238673
S074WTS001	Wittmann:2011napo	-77.7483	-0.260716	0.443101	3018	ss	0.3222	0.52627	0.356138	0.356138	0.411557	FALSE	0.15021	0.158785	0.187928
S256WTS005	Starke:2020vegetation	-70.3539	-17.6669	0.417784	164	su	0.19232	0.01484	0.21209	0.21209	0.2539	FALSE	0.0917998	0.0628748	0.100322
S023WTS022	Bierman:2005fpuerco	-107.448	35.6891	0.354725	306	ss	0.09511	0.10301	0.0681703	0.0681703	0.0759803	FALSE	0.0142854	0.0135806	0.0144472
S086WTS002	Godard:2012marsyandi	84.3335	28.4835	0.382094	2627	mt	0.54704	2.61379	0.450005	0.450005	0.59995	TRUE	0.336614	0.282465	1.02285
S046WTS065	Duxburry:2008shenandoah	-78.9765	38.2772	0.340083	1099	sc	0.1186	0.00511	0	0	0.149062	FALSE	0.0242992	0.0292452	0.0225475
S009WTS002	Schaller:2001european	12.9153	49.1365	0.282324	1110	mt	0.09019	0.02269	0.138999	0.138999	0.152528	FALSE	0.0348737	0.0231423	0.0238992
S009WTS068	Schaller:2001european	2.87658	46.0141	0.2968	960	mt	0.04472	0.02844	0.0956122	0.0956122	0.108095	FALSE	0.0216232	0.018152	0.0204045
S143WTS001	Wittmann:2016po	10.0361	46.2753	0.293978	1474	mt	0.48669	0.91777	0.517001	0.517001	0.561194	FALSE	0.288338	0.292794	0.32802
S274WTS004	Matmon:2020alaska	-151.211	62.7406	0.194677	2117	ig	0.35932	0.66377	0.388233	0.388233	0.445713	TRUE	0.132754	1.46786	0.208876
S076WTS006	Andermann:2011nepal	85.3515	28.5208	0.373354	1958	mt	0.5266	2.35038	0.484378	0.484378	0.585663	FALSE	0.301479	0.344418	0.511909
S158WTS001	Jonell:2016vietnam	106.085	17.7335	0.404125	2385	sc	0.24435	0.0286	0.290421	0.290421	0.321337	FALSE	0.0531611	0.223021	0.0703603
S082WTS031	Bookhagen:2012andes	-65.3967	-23.1841	0.389496	997	su	0.24887	0.04206	0.262211	0.262211	0.31023	FALSE	0.0975797	0.0585767	0.0830816
S094WTS013	Carretier:2013andes	-70.7016	-31.8832	0.358149	610	va	0.36562	0.06675	0.371433	0.371433	0.414804	FALSE	0.169845	0.0927375	0.174017
S102WTS009	Li:2014tibetan	93.7543	35.9041	0.335129	394	ss	0.25027	0.02089	0.256395	0.256395	0.292751	FALSE	0.0782332	0.0700405	0.0586692
S076WTS015	Andermann:2011nepal	84.8406	28.5508	0.356942	2348	mt	0.61928	2.22307	0.504474	0.504474	0.671901	FALSE	0.397972	0.347819	1.27092
S067WTS002	Placzek:2010atacama	-68.8874	-23.6273	0.371146	32	ss	0.0758	0.00115	0.0719596	0.0719596	0.0868875	FALSE	0.0302249	0.0137377	0.019377
S206WTS005	Val:2018andes	-69.9511	-32.2401	0.340753	838	vi	0.4191	0.26898	0.428283	0.428283	0.481836	FALSE	0.190743	0.158766	0.199245
S188WTS014	Reber:2017peruvian	-75.4181	-13.939	0.38701	466	pa	0.249	0.02854	0.289338	0.289338	0.345098	FALSE	0.122466	0.0906306	0.141451
S009WTS067	Schaller:2001european	4.279	46.9489	0.272033	970	pa	0.04184	0.01602	0.0971099	0.0971099	0.107973	FALSE	0.0161085	0.0160069	0.0155117
S235WTS009	Collignon:2019zagros	53.7831	29.0406	0.346103	371	sc	0.14401	0.03271	0.173115	0.173115	0.212096	FALSE	0.0529274	0.0867928	0.0479795
S140WTS006	Abrahami:2016sikkim	88.53	27.7774	0.346728	2693	mt	0.43036	6.23637	0.468986	0.468986	0.58027	FALSE	0.314593	0.360122	0.534785
S102WTS011	Li:2014tibetan	92.6696	35.2398	0.316795	443	sm	0.06619	0.00955	0.071825	0.071825	0.0808214	FALSE	0.0130144	0.00864765	0.0108827
S207WTS029	Stutenbecker:2018rhone	7.95379	46.2865	0.267997	1795	mt	0.47891	0.85051	0.513602	0.513602	0.554056	FALSE	0.306551	0.409933	0.382675
S094WTS001	Carretier:2013andes	-69.5517	-27.0237	0.344658	195	vb	0.25772	0.01656	0.272614	0.272614	0.309146	FALSE	0.108838	0.0611907	0.10391
S188WTS012	Reber:2017peruvian	-74.2899	-14.8744	0.373615	610	vi	0.25301	0.0661	0.284096	0.284096	0.32208	FALSE	0.156517	0.0716209	0.23195
S104WTS024	Scherler:2013garhwal	78.0544	31.1531	0.32888	1772	mt	0.5237	1.37042	0.537267	0.537267	0.590097	FALSE	0.270263	0.346313	0.324169
S059WTS012	Abbuehl:2010peruvian	-79.857	-5.30254	0.380264	907	su	0.12654	0.05206	0.273832	0.273832	0.319704	FALSE	0.109229	0.0852081	0.107483
S188WTS011	Reber:2017peruvian	-74.0655	-15.1784	0.363392	574	vi	0.27514	0.0206475	0.303487	0.303487	0.347366	TRUE	0.162092	0.0819485	0.230706
S086WTS027	Godard:2012marsyandi	84.3027	28.5498	0.326738	2589	mt	0.57883	5.08293	0.462585	0.462585	0.629022	TRUE	0.366867	0.309154	1.16799
S188WTS003	Reber:2017peruvian	-70.6899	-17.4232	0.35344	164	su	0.18979	0.01498	0.225315	0.225315	0.282927	FALSE	0.0974554	0.0673421	0.111692
S188WTS039	Reber:2017peruvian	-77.1673	-10.3956	0.363395	872	sm	0.43029	0.26737	0.473503	0.473503	0.531308	FALSE	0.278678	0.2235	0.426011
S156WTS003	Reusser:2015landscape	-78.7843	36.0273	0.296656	1199	mt	0.03578	0.00322	0.0468291	0.0468291	0.0514353	FALSE	0.00499764	0.0094852	0.010637
S188WTS022	Reber:2017peruvian	-76.9812	-10.9202	0.358019	685	vi	0.40228	0.13668	0.450401	0.450401	0.509307	FALSE	0.232192	0.201738	0.309142
S081WTS002	Roller:2012rwenzori	30.6481	0.0217221	0.360275	987	mt	0.08485	0.00749	0.0922787	0.0922787	0.110167	FALSE	0.00995209	0.0130703	0.0129782
S071WTS028	Henck:2011three	96.9393	30.6212	0.309926	890	sm	0.26522	0.01957	0.267103	0.267103	0.293081	FALSE	0.0738679	0.0731169	0.0550595
S274WTS009	Matmon:2020alaska	-152.454	62.5024	0.159694	1236	sc	0.41837	0.59062	0.448718	0.448718	0.47953	FALSE	0.148376	1.36771	0.209358
S133WTS015	Gonzalez:2016background	-49.8768	-26.7711	0.302047	1635	ss	0.18448	0.01573	0.207294	0.207294	0.25868	FALSE	0.0475698	0.0603419	0.0439486
S137WTS011	Molliex:2016lion	3.52274	43.8086	0.243569	1195	sc	0.17474	0.07341	0.191979	0.191979	0.219676	FALSE	0.0461163	0.0490995	0.045217
S076WTS005	Andermann:2011nepal	85.3208	28.6008	0.293045	1629	mt	0.50167	1.48813	0.464678	0.464678	0.562116	FALSE	0.2773	0.309558	0.471161
S094WTS020	Carretier:2013andes	-70.6421	-35.8122	0.268773	1873	va	0.36913	0.10159	0.377394	0.377394	0.420299	FALSE	0.173614	0.123839	0.180523
S235WTS012	Collignon:2019zagros	53.1135	27.8785	0.292597	267	sc	0.11849	0.1078	0.149132	0.149132	0.20324	FALSE	0.029982	0.0636697	0.0320655
S071WTS041	Henck:2011three	96.8856	29.8812	0.286008	973	pa	0.4239	0.1879	0.430891	0.430891	0.476423	FALSE	0.195869	0.141655	0.23746
S164WTS047	Mandal:2015indian	74.8368	14.9349	0.318021	1966	mt	0.07433	0.00943	0.0887716	0.0887716	0.0999188	FALSE	0.0200414	0.0170834	0.038692
S178WST002	Aguilar:2014huasco	-70.0088	-28.9529	0.28787	552	pa	0.43572	0.052177	0.43965	0.43965	0.478761	TRUE	0.239954	0.0783257	0.274362
S127WTS013	Kober:2015bolivian	-66.0126	-17.5022	0.307125	1459	sm	0.17775	0.13603	0.202522	0.202522	0.23843	FALSE	0.0721666	0.0557533	0.0651205
S105WTS009	Kai:2015qilian	100.599	38.0205	0.253415	733	ss	0.2772	0.39756	0.296202	0.296202	0.348002	FALSE	0.0807785	0.106806	0.0704038
S188WTS028	Reber:2017peruvian	-78.8543	-7.17781	0.318508	1217	vi	0.32794	0.03029	0.366943	0.366943	0.422503	FALSE	0.181374	0.129	0.244228
S207WTS028	Stutenbecker:2018rhone	7.99563	46.2783	0.220974	1847	mt	0.47881	1.55156	0.514139	0.514139	0.555746	FALSE	0.304658	0.425474	0.386218
S123WTS007	Carretier:2015heterogeneous	-75.4044	-13.3898	0.308714	940	vi	0.34364	0.15129	0.359976	0.359976	0.414033	FALSE	0.187007	0.157209	0.278575
S094WTS007	Carretier:2013andes	-70.1148	-30.0135	0.272958	719	pa	0.4647	0.147385	0.471648	0.471648	0.512611	TRUE	0.271164	0.113459	0.335864
S256WTS003	Starke:2020vegetation	-70.921	-17.2006	0.300377	230	vi	0.21732	0.01624	0.23584	0.23584	0.290319	FALSE	0.100529	0.0653444	0.119477
S137WTS002	Molliex:2016lion	6.61079	46.0213	0.216869	2009	sc	0.39357	1.09026	0.385895	0.385895	0.428259	FALSE	0.196662	0.319212	0.216002
S076WTS025	Andermann:2011nepal	84.2659	28.6093	0.274037	2400	mt	0.5955	4.82679	0.454598	0.454598	0.642391	TRUE	0.380398	0.322695	1.3094
S178WST004	Aguilar:2014huasco	-70.2485	-29.375	0.271374	549	pa	0.44129	0.0301348	0.447191	0.447191	0.487531	TRUE	0.235455	0.083677	0.266141
S186WTS008	Portenga:2019potomac	-79.0418	39.5316	0.237942	1218	ss	0.15275	0.01159	0.170072	0.170072	0.183548	FALSE	0.0413181	0.0265228	0.0303473
S206WTS007	Val:2018andes	-69.7514	-34.4609	0.254323	1094	sm	0.35416	0.13877	0.361749	0.361749	0.402904	FALSE	0.167343	0.115017	0.177823
S076WTS022	Andermann:2011nepal	86.2884	27.9928	0.269533	2427	mt	0.55433	2.22226	0.49112	0.49112	0.611578	FALSE	0.322851	0.37128	0.779329
S048WTS003	Kober:2009lluta	-69.6941	-18.1082	0.285151	403	py	0.17899	0.023755	0.224504	0.224504	0.257183	TRUE	0.119417	0.051988	0.170121
S137WTS010	Molliex:2016lion	4.09298	44.0811	0.215244	1168	sc	0.1626	0.07042	0.180634	0.180634	0.210528	FALSE	0.033719	0.0502249	0.03311
S071WTS037	Henck:2011three	98.6886	29.9632	0.258137	803	ss	0.34363	0.03272	0.362585	0.362585	0.408047	FALSE	0.136362	0.112654	0.171231
S127WTS043	Kober:2015bolivian	-63.666	-19.5316	0.276295	956	sm	0.18362	0.395883	0.240508	0.240508	0.332415	TRUE	0.0399941	0.127806	0.0509816
S188WTS031	Reber:2017peruvian	-79.1013	-6.64703	0.290342	1105	vi	0.28028	0.03219	0.315764	0.315764	0.370778	FALSE	0.143258	0.110855	0.165763
S086WTS016	Godard:2012marsyandi	84.2615	28.6288	0.256143	2327	mt	0.60031	4.13432	0.448004	0.448004	0.646026	TRUE	0.385622	0.323387	1.37863
S026WTS021	Reuter:2005susquehanna	-77.2536	41.8757	0.215394	1054	ss	0.13421	0.06021	0.133821	0.133821	0.138505	FALSE	0.0246068	0.0169726	0.0183656
S206WTS006	Val:2018andes	-69.6656	-33.7972	0.240081	944	sm	0.46651	0.33245	0.47119	0.47119	0.524313	FALSE	0.24975	0.218908	0.366386
S226WTS021	Tofelde:2018hillslope	-65.8779	-24.362	0.263176	889	mt	0.27576	0.06786	0.286244	0.286244	0.332423	FALSE	0.116591	0.0629069	0.102654
S156WTS015	Reusser:2015landscape	-83.5517	34.0524	0.238099	1307	mt	0.04491	0.00594	0.0571404	0.0571404	0.0632487	FALSE	0.00651419	0.0120679	0.0122822
S123WTS008	Carretier:2015heterogeneous	-75.8607	-12.3736	0.279912	1043	vi	0.42066	0.06255	0.423562	0.423562	0.480625	FALSE	0.229655	0.247456	0.442905
S146WTS001	Burdis:2016nelson	172.773	-41.4577	0.214655	1675	su	0.30833	0.13834	0.33327	0.33327	0.395392	FALSE	0.0842681	0.109943	0.0806551
S273WTS003	Konyana:2020mpumalanga	30.5623	-26.3776	0.254516	910	pi	0.06852	0.01255	0.075387	0.075387	0.0828191	FALSE	0.0178903	0.00942632	0.0164014
S025WTS011	Safran:2005bolivian	-68.7431	-15.555	0.272231	1646	sm	0.45967	0.18572	0.476981	0.476981	0.53466	FALSE	0.278078	0.174388	0.41676
S151WTS012	Derrieux:2014taiwan	120.973	23.7364	0.257026	3905	ss	0.48507	1.7115	0.511813	0.511813	0.578461	FALSE	0.200103	0.304833	0.250273
S038WTS032	Bierman:2007namibian	17.2661	-21.9477	0.26032	350	mt	0.047	0.00965	0.0561242	0.0561242	0.06582	FALSE	0.0085334	0.0113767	0.0110187
S255WTS001	Charreau:2017tianshan	84.5616	43.3161	0.202608	331	sc	0.3652	0.29089	0.41524	0.41524	0.472645	FALSE	0.141547	0.218691	0.144881
S127WTS027	Kober:2015bolivian	-64.3932	-19.7098	0.258867	941	sm	0.30826	0.08214	0.358564	0.358564	0.436022	FALSE	0.107127	0.160072	0.102128
S164WTS030	Mandal:2015indian	75.4591	12.8438	0.267456	4264	mt	0.14141	0.03047	0.168743	0.168743	0.204675	FALSE	0.042962	0.0493083	0.0422827
S048WTS002	Kober:2009lluta	-69.6525	-18.0747	0.258211	437	py	0.26047	0.02283	0.228386	0.228386	0.261741	FALSE	0.119446	0.0531889	0.174827
S023WTS024	Bierman:2005fpuerco	-107.574	35.5856	0.220616	303	ss	0.08296	0.0654	0.0750686	0.0750686	0.0826501	FALSE	0.0172504	0.0152059	0.0162762
S148WTS003	Fuchs:2015pamir	71.8283	38.5601	0.211813	1035	mt	0.49733	1.71033	0.542338	0.542338	0.656742	FALSE	0.33999	0.48602	0.425982
S009WTS064	Schaller:2001european	3.72635	46.9641	0.198439	1088	sc	0.06497	0.01677	0.0726609	0.0726609	0.0802329	FALSE	0.0100631	0.0105745	0.0114059
S009WTS054	Schaller:2001european	3.67353	44.8295	0.205441	1072	pa	0.14043	0.0438925	0.156898	0.156898	0.169392	TRUE	0.0434039	0.0270499	0.0369545
S009WTS006	Schaller:2001european	13.0529	49.0625	0.167058	1266	mt	0.13482	0.024217	0.160825	0.160825	0.177426	TRUE	0.0448778	0.0253165	0.0284631
S071WTS017	Henck:2011three	98.0539	31.5767	0.137682	918	sm	0.28045	0.0369	0.291095	0.291095	0.336907	FALSE	0.0738897	0.0763336	0.0572022
S218WTS017	Matmon:2018namibia	14.2816	-21.3159	0.0918569	83	vb	0.09587	0.00249	0.115213	0.115213	0.155486	FALSE	0.0250489	0.0311414	0.0275657
S108WTS004	Portenga:2015bhutanese	89.7428	28.0569	0.0869222	920	mt	0.52117	1.02719	0.526142	0.526142	0.584389	FALSE	0.271458	0.417212	0.429818
S143WTS020	Wittmann:2016po	9.03833	44.6273	0.0697021	1337	sc	0.30295	0.2677	0.345527	0.345527	0.403629	FALSE	0.0831398	0.110355	0.0740856
S026WTS009	Reuter:2005susquehanna	-77.8851	40.8515	0.0736454	1149	ss	0.14958	0.01646	0.0985379	0.0985379	0.146652	FALSE	0.0166617	0.0165756	0.014829
S116WTS005	Bierman:2014view	23.2885	-33.8399	0.0808486	791	ss	0.27243	0.00324	0.315214	0.315214	0.381027	TRUE	0.0710852	0.104576	0.0653106
S135WTS019	Struth:2016colombia	-73.5572	5.63114	0.0967312	1517	sm	0.1939	0.00914	0.206825	0.206825	0.246677	FALSE	0.0817103	0.0463201	0.0711004
S127WTS023	Kober:2015bolivian	-66.447	-18.696	0.0918444	879	sm	0.2546	0.05509	0.293054	0.293054	0.360646	FALSE	0.0824905	0.0910203	0.0729517
S151WTS006	Derrieux:2014taiwan	121.006	24.0478	0.088534	3114	ss	0.42631	0.56108	0.452899	0.452899	0.525605	FALSE	0.145328	0.244872	0.163041
S173WTS004	Savi:2016argentina	-65.5463	-23.9405	0.00162292	1446	mt	0.57477	0.51542	0.578862	0.578862	0.634034	TRUE	0.314662	0.162306	0.328563
S127WTS008	Kober:2015bolivian	-65.9737	-18.2741	0.143373	841	sm	0.35335	0.32982	0.395432	0.395432	0.472649	FALSE	0.141765	0.132149	0.134332
S151WTS016	Derrieux:2014taiwan	121.118	23.7948	0.138006	3912	ss	0.55342	5.03926	0.582674	0.582674	0.650379	TRUE	0.235335	0.346508	0.309786
S261WTS046	Riley:2020staircase	-112.031	37.5237	0.119611	299	ss	0.18344	0.139027	0.196397	0.196397	0.252264	TRUE	0.0422283	0.11681	0.046971
S149WTS008	Gonzalez:2016panamanian	-82.5767	9.07208	0.148558	3939	va	0.32173	0.11843	0.348175	0.348175	0.418334	FALSE	0.127066	0.138248	0.137536
S094WTS018	Carretier:2013andes	-70.6202	-35.0839	0.121435	2071	va	0.46148	0.16272	0.474646	0.474646	0.533983	FALSE	0.207851	0.215699	0.218807
S188WTS023	Reber:2017peruvian	-77.2994	-10.8311	0.0812868	340	vi	0.36864	0.04338	0.412142	0.412142	0.473717	FALSE	0.204798	0.144047	0.258067
S135WTS005	Struth:2016colombia	-74.0726	4.16972	0.0823451	2750	sm	0.38785	0.65052	0.405696	0.405696	0.450966	FALSE	0.209912	0.171974	0.270374
S127WTS045	Kober:2015bolivian	-63.4882	-19.5552	0.0775243	1010	sm	0.10831	0.74845	0.146775	0.146775	0.204681	FALSE	0.0201804	0.0618849	0.026917
S092WTS011	Barreto:2013minas	-43.526	-18.4012	0.0776392	1455	ss	0.16203	0.00417	0.172029	0.172029	0.208047	FALSE	0.0386886	0.0404107	0.0325585
S224WTS002	Young:2018lucia	-121.681	36.4263	0.0654847	724	pa	0.28335	0.06839	0.299037	0.299037	0.368424	FALSE	0.0735618	0.105785	0.0667999
S123WTS009	Carretier:2015heterogeneous	-75.7206	-12.7475	0.0792979	1112	vi	0.42061	0.07231	0.434667	0.434667	0.479382	FALSE	0.285087	0.217917	0.499916
S156WTS021	Reusser:2015landscape	-82.5635	35.0618	0.066534	1630	pa	0.15386	0.01468	0.168628	0.168628	0.188862	FALSE	0.0305787	0.0469147	0.0329152
S209WTS012	Rosenkranz:2018shillong	92.0117	25.3915	0.0734174	5664	mt	0.28143	0.06609	0.322736	0.322736	0.379745	FALSE	0.128196	0.0985066	0.156236
S075WTS008	Moon:2011washington	-120.789	47.9986	0.0537469	1853	mt	0.40869	0.36256	0.421304	0.421304	0.461335	FALSE	0.178463	0.21776	0.157008
S135WTS012	Struth:2016colombia	-73.4251	5.35413	0.0799146	1390	sm	0.20859	0.05168	0.222482	0.222482	0.264862	FALSE	0.0955245	0.0561713	0.0776932
S127WTS021	Kober:2015bolivian	-66.4683	-18.7017	0.0758833	890	sm	0.24962	0.04399	0.286266	0.286266	0.350504	FALSE	0.0826274	0.0885239	0.0721359
S095WTS009	Hetzel:2013tibetan	98.9434	38.8168	0.198637	826	su	0.1366	0.04323	0.142524	0.142524	0.153565	FALSE	0.0414245	0.0247724	0.0266419
S274WTS015	Matmon:2020alaska	-146.602	63.2655	0.114602	1197	vb	0.24452	0.92204	0.269551	0.269551	0.283435	FALSE	0.0761594	0.697138	0.102309
S143WTS008	Wittmann:2016po	8.22025	46.1516	0.175892	1927	mt	0.5271	1.41829	0.565783	0.565783	0.61207	FALSE	0.287575	0.479188	0.383308
S108WTS041	Portenga:2015bhutanese	90.0581	27.9086	0.221499	1277	mt	0.49874	0.94773	0.492566	0.492566	0.580427	FALSE	0.280128	0.395415	0.700181
S009WTS061	Schaller:2001european	1.82081	47.5368	0.167092	763	su	0.01883	0.01822	0.0286258	0.0286258	0.0235081	FALSE	0.0023387	0.0055481	0.00771111
S075WTS005	Moon:2011washington	-121.337	47.7713	0.16621	3147	pa	0.47117	0.48722	0.477932	0.477932	0.516086	FALSE	0.189469	0.253447	0.181044
S235WTS007	Collignon:2019zagros	52.3912	29.4431	0.214792	705	sc	0.13702	0.05028	0.162227	0.162227	0.196992	FALSE	0.0450089	0.0563319	0.0382766
S273WTS004	Konyana:2020mpumalanga	30.5476	-27.1009	0.219556	894	ss	0.08435	0.00649	0.0887057	0.0887057	0.0987925	TRUE	0.0222111	0.0106313	0.0151637
S108WTS042	Portenga:2015bhutanese	89.6755	27.9114	0.216053	943	mt	0.52242	0.43843	0.533133	0.533133	0.59238	FALSE	0.284776	0.376656	0.452035
S182WTS025	Schmidt:2016yunnan	100.785	23.8726	0.22289	1406	ss	0.31967	0.08455	0.348967	0.348967	0.443053	FALSE	0.0900179	0.130438	0.0856942
S164WTS004	Mandal:2015indian	76.9034	10.6927	0.239447	1407	mt	0.09117	0.02054	0.108466	0.108466	0.117715	FALSE	0.0325199	0.0445944	0.0371576
S094WTS014	Carretier:2013andes	-70.2528	-32.8321	0.204244	1099	va	0.50855	0.21141	0.505621	0.505621	0.563908	FALSE	0.273557	0.341303	0.361358
S164WTS007	Mandal:2015indian	76.2049	11.3444	0.23731	3310	pa	0.18554	0.03382	0.239121	0.239121	0.262245	FALSE	0.0902769	0.108424	0.101978
S086WTS019	Godard:2012marsyandi	84.2242	28.6758	0.212048	2077	mt	0.59508	2.85725	0.428239	0.428239	0.639047	FALSE	0.352568	0.325568	1.18432
S127WTS020	Kober:2015bolivian	-66.554	-18.2181	0.229565	963	sm	0.18099	0.02293	0.214081	0.214081	0.270341	FALSE	0.057069	0.0571753	0.0565707
S220WTS011	Balco:2013pacific	-123.572	44.0226	0.172807	1964	ss	0.26402	0.0657	0.294885	0.294885	0.372526	FALSE	0.0385472	0.141336	0.0522259
S059WTS011	Abbuehl:2010peruvian	-79.7383	-5.33381	0.238598	1018	mt	0.34812	0.03154	0.358658	0.358658	0.417722	FALSE	0.148731	0.110878	0.146553
S230WTS013	Grin:2018tajikistan	70.1527	39.2354	0.182378	937	sm	0.51952	0.60806	0.567032	0.567032	0.637913	FALSE	0.307635	0.4142	0.392622
S071WTS027	Henck:2011three	96.8205	30.7305	0.202185	900	sm	0.24999	0.02018	0.250826	0.250826	0.275138	FALSE	0.0655001	0.0627283	0.0479707
S143WTS002	Wittmann:2016po	10.3253	46.077	0.15977	1556	mt	0.47355	0.64967	0.507904	0.507904	0.556016	FALSE	0.253617	0.277503	0.276955
S075WTS007	Moon:2011washington	-120.492	47.873	0.129123	1197	pa	0.36658	0.1508	0.384981	0.384981	0.431143	FALSE	0.141597	0.126703	0.130012
S134WTS001	West:2014dilution	103.106	31.0689	0.164159	1728	sm	-9.99999	0.962253	0.604414	0.604414	0.699611	FALSE	0.338553	0.451276	0.540873
S143WTS015	Wittmann:2016po	6.95694	45.0801	0.134947	1106	mt	0.42263	0.93171	0.448419	0.448419	0.49665	FALSE	0.228486	0.188911	0.247024
S071WTS016	Henck:2011three	98.1544	31.8486	0.161507	955	sm	0.33242	0.03712	0.339987	0.339987	0.383466	FALSE	0.103745	0.0980918	0.0899485
S133WTS017	Gonzalez:2016background	-49.4814	-27.5856	0.168095	1635	ss	0.18032	0.0161	0.199576	0.199576	0.235991	FALSE	0.0518753	0.0624349	0.0440405
S143WTS018	Wittmann:2016po	7.29809	44.2774	0.135758	1276	mt	0.44298	0.35007	0.492348	0.492348	0.540784	FALSE	0.198544	0.325675	0.209276
S188WTS002	Reber:2017peruvian	-70.1637	-17.4823	0.180424	294	vi	0.27921	0.02854	0.319101	0.319101	0.383873	FALSE	0.143475	0.0924041	0.171934
S127WTS004	Kober:2015bolivian	-65.1924	-18.9137	0.177215	667	sm	0.28615	0.05146	0.336519	0.336519	0.426183	FALSE	0.0863025	0.12247	0.0787305
S188WTS038	Reber:2017peruvian	-76.7128	-11.5584	0.145287	737	vi	0.37228	0.08233	0.417673	0.417673	0.47897	FALSE	0.210334	0.192869	0.28737
S026WTS026	Reuter:2005susquehanna	-75.6979	41.6846	0.109553	1195	ss	0.10906	0.07678	0.116065	0.116065	0.119352	FALSE	0.0220371	0.0178844	0.0191571
S143WTS021	Wittmann:2016po	9.37161	44.6592	0.104011	1303	sc	0.28972	0.44363	0.324194	0.324194	0.366392	FALSE	0.106569	0.0961512	0.0885132
S009WTS008	Schaller:2001european	13.1044	49.0274	0.122265	1310	mt	0.14238	0.02051	0.157826	0.157826	0.175403	FALSE	0.0445396	0.0254195	0.028756
S127WTS005	Kober:2015bolivian	-65.4866	-17.952	0.177149	939	sm	0.24775	0.02525	0.290679	0.290679	0.360576	FALSE	0.0782437	0.0961667	0.075234
S164WTS048	Mandal:2015indian	74.9832	15.091	0.179715	1212	mt	0.0363	0.00728	0.0476543	0.0476543	0.0494759	FALSE	0.0056707	0.00648068	0.00842011
S091WTS001	Lee:2013patagonian	-71.2525	-53.5256	0.110501	1198	ss	0.14956	0.14727	0.154479	0.154479	0.176941	FALSE	0.0429798	0.0245861	0.0266433
S188WTS001	Reber:2017peruvian	-69.9978	-17.8406	0.138919	250	sm	0.26813	0.013	0.360197	0.360197	0.31767	FALSE	0.174102	0.100816	0.201244
S226WTS024	Tofelde:2018hillslope	-65.8774	-24.2078	0.132782	921	mt	0.25278	0.02446	0.259885	0.259885	0.299201	FALSE	0.0964403	0.0527256	0.0747096
S143WTS007	Wittmann:2016po	8.25386	46.2485	0.100556	2041	mt	0.525	1.42799	0.551465	0.551465	0.591396	FALSE	0.279758	0.492096	0.37462
S138WTS009	Molliex:2016mediterranean	9.1215	42.433	0.107177	969	pa	0.35259	0.05072	0.388508	0.388508	0.439896	FALSE	0.134947	0.157264	0.12294
S188WTS029	Reber:2017peruvian	-79.2698	-6.89201	0.143224	787	su	0.23117	0.01357	0.265076	0.265076	0.308708	FALSE	0.119633	0.088766	0.151763
S082WTS021	Bookhagen:2012andes	-66.253	-24.7257	0.130207	567	mt	0.3695	0.11907	0.380974	0.380974	0.428025	FALSE	0.184981	0.0754493	0.183341
S124WTS001	Carretier:2015chilean	-71.7503	-37.5339	0.113376	2824	su	0.21489	0.06442	0.241904	0.241904	0.283611	FALSE	0.0782185	0.0866419	0.0708209
S220WTS014	Balco:2013pacific	-123.681	44.3525	0.100957	2246	ss	0.27469	0.105832	0.305764	0.305764	0.3711	TRUE	0.0541686	0.120762	0.0578925
S220WTS010	Balco:2013pacific	-123.728	43.806	0.101772	2039	ss	0.28753	0.07208	0.32866	0.32866	0.42568	FALSE	0.0384311	0.190692	0.0592082
S051WTS002	Cox:2009madagascar	47.7534	-19.1199	0.13234	1932	pa	0.13695	0.00546	0.161086	0.161086	0.210284	FALSE	0.0133613	0.0446184	0.0260817
S023WTS033	Bierman:2005fpuerco	-107.484	34.7733	0.115031	303	ss	0.06258	0.02045	0.0711272	0.0711272	0.0753715	FALSE	0.0167701	0.0152398	0.0154001
S182WTS035	Schmidt:2016yunnan	100.824	23.9752	0.127714	1347	ss	0.32762	0.111632	0.356897	0.356897	0.451682	TRUE	0.0903036	0.131382	0.0843698
S188WTS026	Reber:2017peruvian	-78.5769	-8.21219	0.137736	601	vi	0.29139	0.01491	0.331371	0.331371	0.394919	FALSE	0.154762	0.121091	0.227895
S023WTS018	Bierman:2005fpuerco	-106.987	35.9272	0.111547	370	ss	0.10388	0.1411	0.107129	0.107129	0.130606	FALSE	0.0277074	0.0241377	0.0230157
S137WTS007	Molliex:2016lion	4.45882	44.8742	0.0973799	1277	pa	0.25854	0.08738	0.285034	0.285034	0.322281	FALSE	0.0683681	0.0736307	0.0588085
S048WTS004	Kober:2009lluta	-69.6692	-17.816	0.0751443	453	ss	0.15032	0.01095	0.154482	0.154482	0.169561	FALSE	0.0620688	0.0238107	0.0373186
S261WTS018	Riley:2020staircase	-112.512	37.2447	0.0625917	397	ss	0.13574	0.12079	0.148993	0.148993	0.179166	FALSE	0.0331646	0.0671253	0.0293215
S026WTS001	Reuter:2005susquehanna	-76.7905	39.829	0.0603369	1137	mt	0.07445	0.02106	0.0883972	0.0883972	0.0997512	FALSE	0.00915904	0.0159237	0.0139436
S086WTS012	Godard:2012marsyandi	84.0369	28.6512	0.0685035	2166	mt	0.57645	2.88155	0.458603	0.458603	0.627784	FALSE	0.337394	0.343411	0.541755
S016WTS001	Vance:2003himalaya	79.9066	30.7746	0.157923	1171	sm	0.5554	1.84023	0.474237	0.474237	0.627601	FALSE	0.290362	0.496065	0.904191
S086WTS021	Godard:2012marsyandi	84.1547	28.7008	0.160651	1855	mt	0.56962	5.72307	0.425285	0.425285	0.616898	FALSE	0.326294	0.340612	1.31156
S045WTS009	Finnegan:2008namche	94.5429	30.0371	0.157951	1432	ss	0.562	1.5636	0.536759	0.536759	0.598323	FALSE	0.274651	0.404956	0.328956
S026WTS002	Reuter:2005susquehanna	-77.0262	39.9625	0.139801	1121	ss	0.05139	0.01431	0.0579329	0.0579329	0.0647928	FALSE	0.00789022	0.00851043	0.0102689
S182WTS026	Schmidt:2016yunnan	100.83	23.9036	0.165808	1399	ss	0.33749	0.11131	0.366549	0.366549	0.461067	FALSE	0.0943992	0.136134	0.0881574
S156WTS013	Reusser:2015landscape	-82.5031	34.8525	0.148372	1429	pa	0.09229	0.00893	0.106035	0.106035	0.118582	FALSE	0.0176057	0.0272058	0.0214878
S186WTS009	Portenga:2019potomac	-77.7395	39.9181	0.13867	1112	ss	0.07781	0.00636	0.0881539	0.0881539	0.0939758	FALSE	0.0166929	0.0127502	0.0138415
S091WTS008	Lee:2013patagonian	-73.015	-50.8882	0.113971	3102	sm	0.35701	0.32119	0.336299	0.336299	0.387089	FALSE	0.164808	0.289412	0.150302
S082WTS035	Bookhagen:2012andes	-65.3571	-26.0516	0.161466	835	sm	0.17923	0.1271	0.211542	0.211542	0.258151	FALSE	0.0585829	0.0889753	0.0600484
S220WTS004	Balco:2013pacific	-123.665	40.5997	0.135007	1702	ss	0.26096	0.299	0.270263	0.270263	0.316955	FALSE	0.0956302	0.0651157	0.0762563
S094WTS017	Carretier:2013andes	-70.4944	-34.7692	0.144458	1936	va	0.47812	0.16323	0.48638	0.48638	0.542713	FALSE	0.263232	0.267183	0.303915
S071WTS013	Henck:2011three	98.1344	31.8655	0.148992	960	sm	0.31982	0.05429	0.328028	0.328028	0.370183	FALSE	0.0962985	0.0930379	0.0798182
S230WTS012	Grin:2018tajikistan	70.0878	39.2617	0.134883	970	sm	0.52817	0.82673	0.573175	0.573175	0.645395	FALSE	0.32679	0.423717	0.430574
S188WTS027	Reber:2017peruvian	-78.668	-7.96924	0.171696	607	vi	0.30526	0.02296	0.344824	0.344824	0.402058	FALSE	0.158641	0.112356	0.218636
S057WTS001	Delunel:2010pelvoux	6.15625	45.0468	0.1224	1894	mt	0.52544	0.37814	0.557366	0.557366	0.614227	FALSE	0.310946	0.599269	0.396342
S009WTS027	Schaller:2001european	5.66347	48.1545	0.107149	984	sc	0.03723	0.0209	0.0678546	0.0678546	0.073371	FALSE	0.0112625	0.00941497	0.0106325
S123WTS006	Carretier:2015heterogeneous	-74.981	-14.049	0.155573	688	vi	0.33353	0.035205	0.349667	0.349667	0.406839	TRUE	0.17188	0.0906899	0.254789
S104WTS023	Scherler:2013garhwal	77.8428	31.2027	0.136112	1752	mt	0.4864	0.46783	0.504206	0.504206	0.553151	FALSE	0.238713	0.210774	0.256631
S023WTS023	Bierman:2005fpuerco	-107.24	35.8701	0.128832	312	ss	0.05937	0.13332	0.0545383	0.0545383	0.0623263	FALSE	0.00822759	0.00969343	0.0102006
S069WTS021	Norton:2011alps	11.5501	46.3091	0.109596	1220	va	0.42959	0.31178	0.439023	0.439023	0.483689	FALSE	0.181941	0.266957	0.184095
S143WTS024	Wittmann:2016po	10.5476	44.3589	0.113392	843	sc	0.22778	0.6486	0.250356	0.250356	0.281937	FALSE	0.0876028	0.0535437	0.0613272
S188WTS004	Reber:2017peruvian	-70.733	-17.0604	0.15059	398	vi	0.24535	0.0194775	0.278045	0.278045	0.32777	TRUE	0.127497	0.0708847	0.152569
S136WTS011	Schaller:2016european	-5.35323	42.847	0.115445	1183	sm	0.20733	0.04132	0.232163	0.232163	0.274999	FALSE	0.0486759	0.0709375	0.0423619
S021WTS017	vonBlanckenburg:2004tropical	80.6693	7.13551	0.155545	2536	mt	0.21971	0.04231	0.230569	0.230569	0.279551	FALSE	0.0694417	0.0719282	0.0687158
S127WTS031	Kober:2015bolivian	-64.5157	-19.0242	0.147097	573	sm	0.25376	0.05872	0.292603	0.292603	0.363996	FALSE	0.0851781	0.105934	0.0847776
S165WTS036	Cyr:2014distinguishing	11.0766	44.1872	0.111361	1022	sc	0.25622	0.3545	0.289274	0.289274	0.336349	FALSE	0.0815191	0.090322	0.0638512
S025WTS018	Safran:2005bolivian	-68.1238	-15.8454	0.148672	2854	sm	0.50306	0.43524	0.533139	0.533139	0.602152	FALSE	0.242484	0.308491	0.390578
S255WTS003	Charreau:2017tianshan	83.4023	42.6041	0.112567	916	ss	0.40808	0.13002	0.460407	0.460407	0.514269	FALSE	0.12526	0.293434	0.119584
S207WTS026	Stutenbecker:2018rhone	8.15736	46.4366	0.10471	2206	mt	0.46049	0.42109	0.491816	0.491816	0.533555	FALSE	0.254971	0.351351	0.303304
S188WTS035	Reber:2017peruvian	-77.8933	-9.51532	0.149705	726	vi	0.37772	0.05977	0.422936	0.422936	0.491319	FALSE	0.214609	0.149284	0.293737
S009WTS016	Schaller:2001european	8.61635	48.1916	0.0915385	993	sc	0.04376	0.08173	0.101492	0.101492	0.108615	FALSE	0.0197464	0.0250569	0.0201271
S082WTS019	Bookhagen:2012andes	-66.4893	-25.149	0.124105	696	vi	0.31325	0.08181	0.322383	0.322383	0.367287	FALSE	0.165289	0.0663465	0.195448
S094WTS009	Carretier:2013andes	-70.7757	-31.4987	0.116643	694	va	0.39891	0.03071	0.405119	0.405119	0.445975	FALSE	0.197436	0.107691	0.218099
S258WTS006	Fisher:2020magdalena	-75.3487	4.42174	0.136094	2568	mt	0.37149	0.22093	0.392142	0.392142	0.465747	FALSE	0.180835	0.161753	0.205124
S164WTS069	Mandal:2015indian	77.429	11.8346	0.133594	1005	pa	0.20424	0.01787	0.225177	0.225177	0.255863	FALSE	0.0512427	0.0434326	0.0422253
S082WTS003	Bookhagen:2012andes	-65.1821	-23.8776	0.124343	1545	sm	0.32015	0.55787	0.34541	0.34541	0.4131	FALSE	0.122437	0.127342	0.12947
S082WTS023	Bookhagen:2012andes	-66.5384	-25.5601	0.122169	817	vi	0.27169	0.03714	0.284368	0.284368	0.330797	FALSE	0.123016	0.0619483	0.123307
S273WTS008	Konyana:2020mpumalanga	29.8324	-26.5387	0.120652	730	ss	0.04108	0.00384	0.0438442	0.0438442	0.0437442	FALSE	0.00825103	0.00279251	0.00602149
S025WTS017	Safran:2005bolivian	-68.3087	-15.6928	0.12961	2404	sm	0.49546	0.2826	0.52269	0.52269	0.591307	FALSE	0.259314	0.30742	0.41757
S129WTS001	Nobile:2016ambato	-65.93	-28.0602	0.118525	815	mt	0.24617	0.03924	0.295621	0.295621	0.385826	FALSE	0.11446	0.112272	0.117457
S164WTS068	Mandal:2015indian	77.8679	12.4018	0.129613	927	pa	0.10199	0.02561	0.118457	0.118457	0.137831	FALSE	0.0281864	0.023687	0.0248178
S188WTS020	Reber:2017peruvian	-76.5364	-12.0621	0.129483	614	vi	0.35211	0.039	0.40334	0.40334	0.462337	FALSE	0.195081	0.213109	0.265869
S009WTS066	Schaller:2001european	3.68498	46.2292	0.0873797	986	pa	0.0967	0.02196	0.109954	0.109954	0.124372	FALSE	0.0216595	0.0193624	0.0192828
S188WTS033	Reber:2017peruvian	-78.0697	-9.0924	0.124581	686	sm	0.39209	0.06494	0.459317	0.459317	0.501038	FALSE	0.234346	0.175059	0.315527
S102WTS015	Li:2014tibetan	91.6363	33.1484	0.104998	652	sc	0.13699	0.03245	0.142834	0.142834	0.161312	FALSE	0.0256724	0.0265604	0.0207135
S164WTS052	Mandal:2015indian	76.678	11.187	0.12289	1777	pa	0.234	0.01831	0.272315	0.272315	0.326066	FALSE	0.0883195	0.0953154	0.114186
S078WTS003	Hippe:2012altiplano	-68.2287	-16.7048	0.119658	925	sm	0.05956	0.0055	0.0724212	0.0724212	0.0797629	FALSE	0.0158369	0.0142714	0.0129133
S116WTS002	Bierman:2014view	23.362	-33.4991	0.104097	443	ss	0.12241	0.00292	0.144081	0.144081	0.175513	FALSE	0.030822	0.0331283	0.0252611
S009WTS051	Schaller:2001european	3.7062	45.5019	0.087473	1030	pa	0.1437	0.03012	0.159349	0.159349	0.169399	FALSE	0.0476904	0.0293181	0.034633
S164WTS058	Mandal:2015indian	76.0404	11.7296	0.121551	3196	mt	0.11624	0.0126	0.148467	0.148467	0.17479	FALSE	0.0224522	0.0404614	0.0268878
S188WTS009	Reber:2017peruvian	-73.6007	-15.8383	0.117581	158	sm	0.21155	0.00964	0.248835	0.248835	0.308627	TRUE	0.107274	0.0681157	0.137875
S071WTS014	Henck:2011three	98.1089	31.9409	0.103441	949	sm	0.31135	0.03882	0.319168	0.319168	0.360827	FALSE	0.089637	0.0937189	0.07239
S026WTS013	Reuter:2005susquehanna	-76.4023	40.5037	0.0924933	1289	ss	0.08742	0.01388	0.0927161	0.0927161	0.100815	FALSE	0.0156123	0.0138127	0.0140263
S102WTS012	Li:2014tibetan	92.6485	34.8098	0.0994117	487	ss	0.09286	0.02224	0.101028	0.101028	0.113525	FALSE	0.0183729	0.0151615	0.0146651
S094WTS008	Carretier:2013andes	-70.4571	-30.4579	0.104216	793	pa	0.44661	0.03576	0.449598	0.449598	0.492793	FALSE	0.228559	0.16607	0.249497
S138WTS008	Molliex:2016mediterranean	9.08053	42.4199	0.0890986	982	pa	0.36023	0.06021	0.397174	0.397174	0.449443	FALSE	0.137286	0.170827	0.127622
S220WTS008	Balco:2013pacific	-123.854	42.9929	0.0880486	1824	ss	0.26118	0.09758	0.278562	0.278562	0.329449	FALSE	0.0691491	0.0900509	0.0630056
S061WTS013	Insel:2010bolivian	-65.5888	-18.9216	0.112898	867	sm	0.28064	0.02629	0.301777	0.301777	0.370676	FALSE	0.0882525	0.0984839	0.0837437
S048WTS005	Kober:2009lluta	-69.6015	-17.8729	0.113537	492	ss	0.15433	0.01139	0.160394	0.160394	0.17628	FALSE	0.0655175	0.025272	0.044085
S256WTS011	Starke:2020vegetation	-74.7019	-15.1181	0.114203	145	su	0.18252	0.10742	0.196535	0.196535	0.227143	FALSE	0.0878658	0.0480446	0.0878498
S069WTS023	Norton:2011alps	10.3926	46.2242	0.0540047	1409	mt	0.50262	0.6703	0.508333	0.508333	0.547691	FALSE	0.265428	0.268151	0.265482
S224WTS001	Young:2018lucia	-121.467	36.2316	0.0625306	791	ss	0.34554	0.17631	0.362936	0.362936	0.445097	FALSE	0.0968966	0.137876	0.0896886
S283WTS034	Delunel:2020alps	7.77439	46.0514	0.0536862	1604	mt	0.47863	1.80889	0.519846	0.519846	0.571963	TRUE	0.334339	0.583267	0.473148
S026WTS033	Reuter:2005susquehanna	-78.3685	41.4554	0.000343753	1338	ss	0.17545	0.02227	0.189291	0.189291	0.2172	FALSE	0.0194043	0.0279874	0.0204085
S262WTS005	Bender:2018yukon	-143.032	63.6337	0.0524938	478	va	0.0978	0.01038	0.106371	0.106371	0.108354	FALSE	0.0204083	0.121568	0.0313435
S037WTS005	Wittmann:2007switzerland	7.80792	46.9193	0.0803583	1648	sm	0.2428	0.20842	0.26844	0.26844	0.311987	FALSE	0.0596345	0.105776	0.0537052
S021WTS016	vonBlanckenburg:2004tropical	80.6388	7.08617	0.115508	2801	mt	0.14491	0.02036	0.221065	0.221065	0.270558	FALSE	0.0658462	0.0695545	0.0619008
S037WTS026	Wittmann:2007switzerland	8.59528	46.6987	0.0789072	2464	mt	0.56455	1.52045	0.566269	0.566269	0.607278	TRUE	0.311796	0.55481	0.384397
S026WTS010	Reuter:2005susquehanna	-78.7427	40.7444	0.086837	1289	ss	0.10538	0.01931	0.116716	0.116716	0.125319	FALSE	0.014915	0.0209798	0.0172178
S207WTS006	Stutenbecker:2018rhone	7.21379	45.9914	0.0787326	1712	mt	0.49023	2.25614	0.527271	0.527271	0.570967	FALSE	0.296861	0.450614	0.353935
S182WTS032	Schmidt:2016yunnan	100.798	24.0167	0.100362	1340	ss	0.32318	0.09955	0.353362	0.353362	0.449631	FALSE	0.0899753	0.131011	0.0840482
S135WTS006	Struth:2016colombia	-73.9254	4.47718	0.108842	2320	sm	0.30274	0.09823	0.316155	0.316155	0.359529	FALSE	0.16926	0.097118	0.160773
S127WTS042	Kober:2015bolivian	-63.6264	-18.6412	0.1033	1403	nd	0.24094	0.70518	0.300288	0.300288	0.399253	FALSE	0.0755486	0.196202	0.0790624
S188WTS010	Reber:2017peruvian	-74.0573	-15.5632	0.104906	272	pa	0.32149	0.01474	0.360046	0.360046	0.416347	FALSE	0.163873	0.0984097	0.177065
S070WTS012	Palumbo:2010tibet	99.3447	38.8067	0.0843889	882	ss	0.4345	0.16629	0.457659	0.457659	0.523501	FALSE	0.162517	0.200049	0.164889
S137WTS014	Molliex:2016lion	2.66161	42.4655	0.0793444	978	mt	0.28135	0.12915	0.310251	0.310251	0.350659	FALSE	0.0956887	0.0808932	0.0847889
S069WTS004	Norton:2011alps	11.6615	46.3581	0.0732081	1256	sc	0.44712	0.34377	0.450868	0.450868	0.500833	FALSE	0.181373	0.33613	0.178653
S026WTS022	Reuter:2005susquehanna	-77.0251	41.769	0.078259	1080	ss	0.11692	0.04024	0.123272	0.123272	0.129703	FALSE	0.024254	0.0148122	0.0176069
S038WTS019	Bierman:2007namibian	16.3698	-21.1345	0.0948531	400	pa	0.0524	0.00726	0.0569976	0.0569976	0.060321	FALSE	0.0119724	0.0102408	0.0102808
S127WTS016	Kober:2015bolivian	-66.6193	-17.7848	0.0967458	910	sm	0.28722	0.12956	0.331684	0.331684	0.41199	FALSE	0.107521	0.106603	0.109506
S026WTS028	Reuter:2005susquehanna	-78.2973	41.5423	0.0759964	1294	ss	0.20034	0.02173	0.222621	0.222621	0.23137	FALSE	0.033657	0.043513	0.0324926
S188WTS040	Reber:2017peruvian	-76.3344	-11.8083	0.0988187	1159	vi	0.44786	0.19965	0.500164	0.500164	0.562702	FALSE	0.278414	0.301519	0.419326
S138WTS016	Molliex:2016mediterranean	9.204	42.231	0.0747333	996	pa	0.33879	0.05386	0.374182	0.374182	0.425146	FALSE	0.126131	0.122388	0.118813
S139WTS025	Olivetti:2016massif	4.59534	45.0291	0.0707618	1155	mt	0.21438	0.04553	0.235882	0.235882	0.262511	FALSE	0.0539921	0.0502074	0.044149
S137WTS006	Molliex:2016lion	5.75356	45.4461	0.070166	1585	sm	0.27774	0.25775	0.284067	0.284067	0.310682	FALSE	0.105361	0.245949	0.103903
S207WTS025	Stutenbecker:2018rhone	8.22893	46.4502	0.0685472	2273	mt	0.47332	1.31604	0.50541	0.50541	0.545782	FALSE	0.25714	0.280621	0.287548
S082WTS011	Bookhagen:2012andes	-65.9556	-24.731	0.0900222	726	mt	0.41615	0.57866	0.433464	0.433464	0.493434	FALSE	0.204563	0.122828	0.2213
S009WTS063	Schaller:2001european	3.30342	47.1768	0.0658517	957	sc	0.06305	0.01031	0.0689676	0.0689676	0.072232	FALSE	0.0109106	0.00799279	0.010358
S182WTS048	Schmidt:2016yunnan	100.341	21.8944	0.0898382	1731	pa	0.16973	0.03783	0.192645	0.192645	0.264295	FALSE	0.0389103	0.0748951	0.0399769
S023WTS025	Bierman:2005fpuerco	-107.273	35.9331	0.0775782	309	ss	0.10458	0.17318	0.0453098	0.0453098	0.0480372	FALSE	0.00668686	0.00751183	0.00888014
S061WTS019	Insel:2010bolivian	-63.9757	-19.9135	0.08937	975	sm	0.234	0.22332	0.26707	0.26707	0.363596	FALSE	0.0440599	0.133662	0.0527447
S075WTS003	Moon:2011washington	-120.571	47.9921	0.0632577	1507	pa	0.41636	0.20728	0.423644	0.423644	0.463555	FALSE	0.175034	0.164419	0.163092
S151WTS001	Derrieux:2014taiwan	121.176	24.2702	0.0858215	3187	ss	0.54532	1.39588	0.566747	0.566747	0.646685	FALSE	0.224329	0.351346	0.319221
S086WTS010	Godard:2012marsyandi	84.2341	28.7608	0.0821444	1521	pa	0.55226	2.02073	0.460049	0.460049	0.596179	FALSE	0.246123	0.391496	0.487353
S256WTS006	Starke:2020vegetation	-70.0448	-18.0962	0.0890464	162	py	0.20852	0.00672	0.26371	0.26371	0.315672	FALSE	0.135321	0.080774	0.168877
S164WTS033	Mandal:2015indian	75.3926	12.9898	0.0911451	4666	mt	0.15409	0.0462	0.17819	0.17819	0.211301	FALSE	0.0502356	0.0583199	0.0458747
S071WTS042	Henck:2011three	97.097	29.8347	0.0810428	972	pa	0.46754	0.42974	0.475951	0.475951	0.528356	FALSE	0.21186	0.153573	0.258273
S123WTS002	Carretier:2015heterogeneous	-72.893	-15.8449	0.0897389	358	sm	0.26567	0.07138	0.286765	0.286765	0.350623	FALSE	0.13501	0.0973657	0.191387
S037WTS014	Wittmann:2007switzerland	8.59083	46.3582	0.0635113	2458	mt	0.60457	0.6579	0.601859	0.601859	0.644974	FALSE	0.314718	0.636632	0.390818
S164WTS074	Mandal:2015indian	75.7513	12.3248	0.0896993	3477	pa	0.10487	0.01523	0.131944	0.131944	0.151685	FALSE	0.0178357	0.0300242	0.0214649
S207WTS024	Stutenbecker:2018rhone	8.24385	46.458	0.0631604	2350	mt	0.469	0.8968	0.502046	0.502046	0.54384	FALSE	0.251791	0.29099	0.280748
S127WTS044	Kober:2015bolivian	-63.7982	-18.7466	0.0866472	1365	sm	0.29765	0.41659	0.352199	0.352199	0.436754	FALSE	0.105235	0.215051	0.119861
S130WTS002	Schildgen:2016argentina	-65.57	-23.2164	0.0837799	666	sm	0.21697	0.0385434	0.239945	0.239945	0.284089	TRUE	0.0837612	0.0505421	0.0698154
S023WTS012	Bierman:2005fpuerco	-108.104	35.4511	0.074127	312	ss	0.04675	0.046495	0.0811237	0.0811237	0.0935434	TRUE	0.013099	0.0171918	0.0132237
S129WTS002	Nobile:2016ambato	-65.944	-27.9913	0.0798965	841	mt	0.21601	0.03592	0.263211	0.263211	0.350249	FALSE	0.100764	0.0957975	0.101879
S070WTS003	Palumbo:2010tibet	97.6482	39.4918	0.0694537	730	mt	0.3407	0.09285	0.360114	0.360114	0.428006	FALSE	0.106823	0.133919	0.0916696
S182WTS022	Schmidt:2016yunnan	100.803	24.0685	0.0817958	1324	ss	0.3199	0.13155	0.351479	0.351479	0.451116	FALSE	0.0858345	0.135921	0.0817297
S075WTS011	Moon:2011washington	-120.936	47.5827	0.0597994	2032	pa	0.47315	0.21861	0.47644	0.47644	0.520582	FALSE	0.202977	0.225044	0.19886
S105WTS006	Kai:2015qilian	98.7666	38.9304	0.0688132	868	sm	0.1135	0.02696	0.120209	0.120209	0.134775	FALSE	0.028147	0.0195072	0.0181916
S037WTS013	Wittmann:2007switzerland	8.57309	46.3752	0.052671	2522	mt	0.6008	0.63964	0.598592	0.598592	0.643449	FALSE	0.319932	0.663933	0.393757
S070WTS006	Palumbo:2010tibet	98.7559	39.1807	0.0591721	920	ss	0.508	0.77819	0.534123	0.534123	0.620584	FALSE	0.198569	0.231738	0.225585
S108WTS005	Portenga:2015bhutanese	89.5282	27.894	0.0674382	836	mt	0.52975	0.64395	0.539013	0.539013	0.599083	FALSE	0.272589	0.335526	0.388311
S096WTS012	Glotzbach:2013glacially	6.86493	44.7522	0.0540599	1188	mt	0.4579	0.59411	0.46664	0.46664	0.510098	FALSE	0.207069	0.2212	0.202866
S224WTS016	Young:2018lucia	-121.506	36.0329	0.00218472	974	pi	0.48028	0.2037	0.471438	0.471438	0.54776	TRUE	0.166703	0.160304	0.153999
S020WTS008	Hewawasam:2003tropical	80.6478	7.01299	0.0877134	3038	mt	0.22153	0.0115228	0.237846	0.237846	0.286974	TRUE	0.0790345	0.0711912	0.0713194
S117WTS006	Chadwick:2013weathering	31.0003	-23.0199	0.0659493	618	mt	0.01871	0.0048	0.0248986	0.0248986	0.0223183	FALSE	0.00386452	0.00211607	0.00503378
S096WTS013	Glotzbach:2013glacially	6.88284	44.7579	0.0478337	1187	mt	0.4464	0.50608	0.452882	0.452882	0.496202	FALSE	0.201174	0.176767	0.18716
S139WTS017	Olivetti:2016massif	4.76226	44.9069	0.00171042	1253	mt	0.26801	0.02851	0.303515	0.303515	0.35723	FALSE	0.0515185	0.0767044	0.0467279
S186WTS046	Portenga:2019potomac	-79.4141	38.9121	0.00209167	1498	ss	0.29477	0.01288	0.312948	0.312948	0.34058	FALSE	0.109666	0.0366081	0.0732245
S127WTS014	Kober:2015bolivian	-66.5522	-17.5428	0.0840611	875	sm	0.30883	0.10934	0.350205	0.350205	0.425011	FALSE	0.1171	0.100091	0.101598
S065WTS004	Guralnik:2010pavements	34.903	30.548	0.0749833	90	sc	0.1062	0.03309	0.119598	0.119598	0.159858	FALSE	0.0208712	0.0384227	0.022603
S256WTS002	Starke:2020vegetation	-72.774	-16.0872	0.0835552	135	py	0.20006	0.03313	0.218379	0.218379	0.25487	FALSE	0.10578	0.0659629	0.153038
S045WTS008	Finnegan:2008namche	94.7195	29.7601	0.0753109	1562	mt	0.4276	0.27111	0.436455	0.436455	0.486434	FALSE	0.198395	0.136006	0.212839
S230WTS017	Grin:2018tajikistan	71.1929	39.4095	0.0664486	871	sm	0.50766	1.84408	0.567539	0.567539	0.660286	FALSE	0.281597	0.525613	0.347023
S038WTS034	Bierman:2007namibian	17.3826	-22.0399	0.0796667	343	mt	0.0508	0.00814	0.0638092	0.0638092	0.0843121	FALSE	0.0105456	0.0132086	0.0132492
S156WTS017	Reusser:2015landscape	-80.2773	37.1796	0.0675667	1068	ss	0.17455	0.00763	0.202282	0.202282	0.240853	FALSE	0.032217	0.0678752	0.0358839
S127WTS026	Kober:2015bolivian	-64.286	-19.4421	0.0794854	832	sm	0.25797	0.06949	0.295246	0.295246	0.360492	FALSE	0.0868602	0.102599	0.0849064
S164WTS005	Mandal:2015indian	76.608	10.5952	0.0819271	2303	pa	0.10224	0.02682	0.122485	0.122485	0.137222	FALSE	0.0292831	0.0483246	0.0347362
S140WTS003	Abrahami:2016sikkim	88.7592	27.7959	0.0706396	1854	mt	0.47583	2.14022	0.521477	0.521477	0.584017	FALSE	0.315332	0.451413	0.477088
S229WTS004	Kober:2019steep	8.28583	46.6519	0.0530708	2327	mt	0.57403	1.29264	0.569732	0.569732	0.614132	TRUE	0.309222	0.650031	0.383674
S026WTS003	Reuter:2005susquehanna	-77.1637	40.1081	0.0589919	1143	sc	0.08127	0.01961	0.0870465	0.0870465	0.0931177	FALSE	0.0145295	0.0116556	0.0129295
S037WTS009	Wittmann:2007switzerland	8.06786	46.9592	0.0525847	1734	sm	0.28321	0.351675	0.300818	0.300818	0.339043	TRUE	0.0895656	0.114509	0.0719423
S009WTS015	Schaller:2001european	8.58132	48.1326	0.0507527	1005	sc	0.0306	0.04434	0.0908765	0.0908765	0.0966299	FALSE	0.0165223	0.0207371	0.0185024
S143WTS023	Wittmann:2016po	10.2968	44.4587	0.0542653	987	sc	0.22467	0.50009	0.253991	0.253991	0.292017	FALSE	0.0758241	0.0629691	0.056921
S226WTS018	Tofelde:2018hillslope	-65.9957	-24.6773	0.0686111	679	mt	0.39268	2.33624	0.411612	0.411612	0.469669	TRUE	0.184631	0.100825	0.192673
S082WTS038	Bookhagen:2012andes	-65.4491	-22.8772	0.0690289	809	sm	0.18363	0.01364	0.196493	0.196493	0.232256	FALSE	0.0535667	0.0340943	0.0372679
S070WTS008	Palumbo:2010tibet	99.0245	39.0761	0.0581597	893	ss	0.5106	0.39344	0.536081	0.536081	0.615945	FALSE	0.202577	0.240057	0.235343
S025WTS041	Safran:2005bolivian	-67.3513	-16.736	0.0712948	1667	sm	0.52588	0.33845	0.546986	0.546986	0.611109	FALSE	0.280038	0.315723	0.445899
S025WTS030	Safran:2005bolivian	-67.498	-17.148	0.0710476	1055	sm	0.34028	0.17593	0.360002	0.360002	0.43289	FALSE	0.141253	0.179943	0.146836
S026WTS005	Reuter:2005susquehanna	-77.4075	40.3192	0.0566711	1196	ss	0.13805	0.01103	0.140022	0.140022	0.149769	FALSE	0.0240659	0.0192384	0.0188831
S183WTS019	Kim:2017seti	83.8904	28.3981	0.00872292	3884	mt	0.5845	0.35704	0.574588	0.574588	0.653382	FALSE	0.348023	0.253826	0.412571
S067WTS004	Placzek:2010atacama	-69.2899	-23.3518	0.067416	17	ss	0.062	0.0005775	0.0656294	0.0656294	0.0760751	TRUE	0.0296109	0.00932543	0.0140346
S009WTS003	Schaller:2001european	12.8959	49.3063	0.04771	927	mt	0.11243	0.01889	0.117691	0.117691	0.126389	FALSE	0.0257163	0.0176673	0.0177111
S070WTS002	Palumbo:2010tibet	97.4484	39.499	0.0563647	731	sm	0.3233	0.03516	0.342417	0.342417	0.406439	FALSE	0.101558	0.114847	0.0968108
S009WTS057	Schaller:2001european	4.06553	44.807	0.0471944	1361	pa	0.10665	0.06832	0.160412	0.160412	0.173086	FALSE	0.0394652	0.0277935	0.0303116
S108WTS023	Portenga:2015bhutanese	90.1191	27.5997	0.0586465	1776	mt	0.51163	0.26731	0.532075	0.532075	0.596775	FALSE	0.26241	0.304455	0.307528
S092WTS027	Barreto:2013minas	-43.8644	-18.1688	0.062521	1434	ss	0.11975	0.00379	0.124743	0.124743	0.156631	FALSE	0.0243692	0.0279095	0.0208702
S095WTS005	Hetzel:2013tibetan	99.2709	38.8543	0.0566594	913	vb	0.4235	0.19932	0.444728	0.444728	0.505873	FALSE	0.157183	0.179101	0.153526
S140WTS004	Abrahami:2016sikkim	88.6194	27.9507	0.0640993	1580	mt	0.37395	1.09988	0.412049	0.412049	0.474536	FALSE	0.200974	0.335662	0.271157
S104WTS020	Scherler:2013garhwal	78.3505	30.9338	0.0613424	2229	mt	0.5447	1.18925	0.570502	0.570502	0.614456	FALSE	0.282728	0.436004	0.341358
S261WTS038	Riley:2020staircase	-112.185	37.3049	0.0568715	332	ss	0.13462	0.15927	0.14595	0.14595	0.177149	FALSE	0.0314861	0.0793895	0.0295597
S283WTS029	Delunel:2020alps	7.76715	46.0203	0.0425006	1685	mt	0.45739	1.42907	0.496517	0.496517	0.550496	TRUE	0.311743	0.572483	0.415348
S135WTS003	Struth:2016colombia	-73.8905	4.56281	0.0609507	2349	sm	0.28109	0.06906	0.29525	0.29525	0.338421	FALSE	0.159939	0.0938282	0.151313
S069WTS029	Norton:2011alps	11.3848	46.6764	0.0489317	1087	mt	0.41557	0.30336	0.426957	0.426957	0.46397	FALSE	0.204356	0.131954	0.197384
S235WTS016	Collignon:2019zagros	53.5664	28.715	0.0624681	339	sc	0.10524	0.03432	0.134505	0.134505	0.16986	FALSE	0.0328288	0.0482245	0.0287126
S230WTS018	Grin:2018tajikistan	71.4146	39.4364	0.0549861	854	sm	0.43033	0.42336	0.480066	0.480066	0.533676	FALSE	0.216264	0.351504	0.269859
S156WTS018	Reusser:2015landscape	-80.1839	36.822	0.0569493	1230	ss	0.14477	0.00985	0.170309	0.170309	0.201603	FALSE	0.0259885	0.0496529	0.0318104
S105WTS008	Kai:2015qilian	100.947	37.9107	0.0555062	716	ss	0.193	0.74542	0.211835	0.211835	0.24972	FALSE	0.0452883	0.0700699	0.039089
S075WTS012	Moon:2011washington	-120.695	47.4359	0.0412232	1027	ss	0.38737	0.0703	0.404886	0.404886	0.464544	FALSE	0.131839	0.158365	0.11926
S186WTS010	Portenga:2019potomac	-77.2464	39.815	0.0466326	1086	ss	0.0386	0.01042	0.046655	0.046655	0.0517329	FALSE	0.00620282	0.00631326	0.00848956
S026WTS062	Reuter:2005susquehanna	-77.6458	40.3774	0.000348959	1122	ss	0.08346	0.00366	0.0845637	0.0845637	0.0845843	FALSE	0.0113699	0.00507515	0.00767886
S140WTS007	Abrahami:2016sikkim	88.3749	27.6189	0.0622299	4111	mt	0.39997	5.09285	0.415798	0.415798	0.714336	FALSE	0.466404	0.201478	0.741427
S143WTS017	Wittmann:2016po	7.17286	44.587	0.0498139	1207	mt	0.39843	0.20937	0.435607	0.435607	0.479631	FALSE	0.177301	0.203521	0.168819
S023WTS028	Bierman:2005fpuerco	-107.564	35.7329	0.0567684	279	ss	0.05057	0.05673	0.0601202	0.0601202	0.0626887	FALSE	0.00855192	0.0129998	0.0118129
S193WTS019	Wang:2017wenchuan	103.948	31.424	0.0595597	1732	ss	0.58056	0.54704	0.418825	0.418825	0.628974	FALSE	0.234015	0.309465	0.33103
S224WTS021	Young:2018lucia	-121.259	36.0318	0.0556229	639	ss	0.19525	0.16908	0.213582	0.213582	0.281998	FALSE	0.0400913	0.0853212	0.0418116
S127WTS041	Kober:2015bolivian	-63.4498	-19.282	0.0553056	1127	sm	0.14438	0.50285	0.186409	0.186409	0.262766	FALSE	0.0291308	0.0998653	0.0399918
S147WTS004	Larsen:2014rapid	170.489	-43.372	0.0498646	4767	mt	0.56869	6.27999	0.577089	0.577089	0.643671	FALSE	0.252676	0.496534	0.289675
S207WTS023	Stutenbecker:2018rhone	8.26509	46.4915	0.047009	2446	mt	0.45964	1.69767	0.490145	0.490145	0.530998	FALSE	0.250729	0.274441	0.274834
S075WTS004	Moon:2011washington	-121.365	47.8983	0.0453893	3417	pa	0.50727	0.45447	0.512962	0.512962	0.553338	FALSE	0.200376	0.322239	0.189992
S164WTS046	Mandal:2015indian	74.7804	14.4519	0.0654382	3616	mt	0.0865	0.0186	0.117977	0.117977	0.146745	FALSE	0.0211511	0.0353312	0.0541679
S256WTS012	Starke:2020vegetation	-74.6363	-14.9069	0.0652309	338	su	0.19774	0.04006	0.210362	0.210362	0.253078	FALSE	0.100666	0.0550243	0.12166
S076WTS012	Andermann:2011nepal	85.3396	27.9137	0.0596117	2942	mt	0.45849	0.42236	0.475301	0.475301	0.536269	FALSE	0.213627	0.18369	0.233408
S146WTS005	Burdis:2016nelson	172.594	-41.461	0.0503312	2009	sc	0.39254	0.15076	0.415153	0.415153	0.487627	FALSE	0.111771	0.158378	0.110027
S261WTS017	Riley:2020staircase	-112.512	37.2736	0.0530951	405	ss	0.1329	0.29052	0.144667	0.144667	0.174715	FALSE	0.0329833	0.067965	0.0285816
S023WTS019	Bierman:2005fpuerco	-106.984	36.0622	0.0538205	399	ss	0.04316	0.20889	0.10004	0.10004	0.119938	FALSE	0.0293365	0.0202921	0.0244789
S009WTS065	Schaller:2001european	3.51031	46.5863	0.0450462	849	su	0.026	0.00976	0.0327603	0.0327603	0.0283598	FALSE	0.00301957	0.0051632	0.00730873
S283WTS033	Delunel:2020alps	7.76775	46.0286	0.0454933	1660	mt	0.46855	1.71869	0.50905	0.50905	0.562842	TRUE	0.323999	0.598826	0.442698
S082WTS005	Bookhagen:2012andes	-66.0604	-27.5726	0.0579597	885	mt	0.18212	0.0739	0.20416	0.20416	0.267804	FALSE	0.0614825	0.064496	0.0552496
S023WTS027	Bierman:2005fpuerco	-107.338	35.9304	0.0470492	301	ss	0.03644	0.14695	0.0445863	0.0445863	0.0459353	FALSE	0.00656853	0.00746148	0.00906169
S121WTS008	Dixon:2016alps	14.5949	47.3061	0.00836042	1558	mt	0.40141	0.07596	0.406984	0.406984	0.449575	FALSE	0.14322	0.0921599	0.116509
S038WTS023	Bierman:2007namibian	15.9539	-22.6342	0.0600889	178	mt	0.0992	0.01012	0.108911	0.108911	0.132092	FALSE	0.0180428	0.0273498	0.0177158
S182WTS021	Schmidt:2016yunnan	100.795	24.1215	0.0590896	1343	ss	0.32391	0.0879	0.359424	0.359424	0.463165	FALSE	0.0858422	0.145663	0.082702
S021WTS007	vonBlanckenburg:2004tropical	80.7421	7.14177	0.00874028	2107	mt	0.23854	0.01804	0.259461	0.259461	0.302526	FALSE	0.0995908	0.057975	0.0728079
S156WTS020	Reusser:2015landscape	-81.7261	36.0029	0.0519764	1393	mt	0.19523	0.02029	0.221164	0.221164	0.264781	FALSE	0.0445786	0.0653498	0.0419295
S086WTS001	Godard:2012marsyandi	84.6547	28.1036	0.0566557	2762	mt	0.43028	0.998483	0.448129	0.448129	0.504615	TRUE	0.198793	0.205152	0.247084
S207WTS005	Stutenbecker:2018rhone	7.46683	46.0835	0.0444826	1391	mt	0.47238	3.66237	0.503203	0.503203	0.541936	FALSE	0.328728	0.35164	0.380173
S102WTS016	Li:2014tibetan	91.7442	32.4347	0.0540577	705	sc	0.12455	0.032	0.125632	0.125632	0.140246	FALSE	0.0226967	0.0174917	0.0160799
S164WTS031	Mandal:2015indian	75.6167	12.6706	0.0624049	4156	mt	0.18348	0.03113	0.214635	0.214635	0.263765	FALSE	0.0568645	0.0604506	0.0519987
S261WTS045	Riley:2020staircase	-112.006	37.6267	0.0506514	304	ss	0.1883	0.26811	0.20383	0.20383	0.263666	FALSE	0.0401226	0.112372	0.0406857
S018WTS011	Morel:2003wutach	8.25083	47.8895	0.0424804	1434	mt	0.08652	0.05897	0.154033	0.154033	0.166788	FALSE	0.0327976	0.0315266	0.0292981
S082WTS041	Bookhagen:2012andes	-65.5091	-24.5353	0.0571847	1681	sm	0.3412	1.05547	0.364413	0.364413	0.421805	FALSE	0.158817	0.107222	0.165362
S023WTS032	Bierman:2005fpuerco	-107.755	35.5834	0.0508359	277	ss	0.05152	0.05305	0.0587749	0.0587749	0.0628503	FALSE	0.00904769	0.0111512	0.0106612
S009WTS026	Schaller:2001european	8.53218	48.7304	0.0368356	1298	ss	0.07119	0.04126	0.196592	0.196592	0.209559	FALSE	0.0581602	0.0306512	0.041152
S023WTS003	Bierman:2005fpuerco	-107.14	34.6472	0.0457811	301	ss	0.0565	0.01414	0.0641781	0.0641781	0.0737932	FALSE	0.0157234	0.0119245	0.0118027
S118WTS006	Dirks:2016cradle	27.782	-26.0463	0.0557965	705	sc	0.06102	0.0030775	0.0683953	0.0683953	0.0740688	TRUE	0.0163798	0.00765579	0.0104434
S269WTS011	Bellingham:2020ohau	169.968	-43.9372	0.0342805	3357	sm	0.53529	1.42445	0.530125	0.530125	0.575422	FALSE	0.266531	0.227497	0.254412
S188WTS034	Reber:2017peruvian	-78.0531	-9.35082	0.0611375	580	pa	0.35871	0.05401	0.401704	0.401704	0.468625	FALSE	0.187718	0.141933	0.228903
S072WTS007	Dortch:2011ladakh	77.4194	34.4466	0.0508353	724	pa	0.4846	0.06824	0.487164	0.487164	0.549012	FALSE	0.227938	0.266204	0.271006
S026WTS012	Reuter:2005susquehanna	-78.584	40.1813	0.0470093	1115	ss	0.125	0.00881	0.137632	0.137632	0.150064	FALSE	0.024663	0.0240992	0.0207118
S182WTS037	Schmidt:2016yunnan	100.652	23.7859	0.0562458	1435	ss	0.26986	0.0648	0.29985	0.29985	0.393476	FALSE	0.0778408	0.110027	0.0778885
S149WTS032	Gonzalez:2016panamanian	-81.2994	8.38542	0.0607861	4188	vi	0.19068	0.09194	0.204799	0.204799	0.262528	FALSE	0.0573092	0.0542373	0.0492199
S139WTS024	Olivetti:2016massif	4.5347	45.0273	0.0431611	1184	mt	0.23272	0.04906	0.255288	0.255288	0.282424	FALSE	0.0587215	0.0539948	0.0473324
S037WTS033	Wittmann:2007switzerland	8.34802	46.33	0.0421386	2349	mt	0.53293	1.12577	0.54533	0.54533	0.587421	TRUE	0.288455	0.504955	0.396679
S062WTS005	Meyer:2008rhenish	8.41689	51.4488	0.0380111	1069	ss	0.07722	0.06426	0.0986422	0.0986422	0.109594	FALSE	0.0158509	0.01556	0.0139997
S104WTS016	Scherler:2013garhwal	78.4369	31.108	0.0518306	2018	mt	0.5551	3.07922	0.542677	0.542677	0	FALSE	0.296305	0.501415	0.374462
S188WTS019	Reber:2017peruvian	-76.5154	-12.3404	0.0590514	253	pa	0.3291	0.02639	0.385446	0.385446	0.461032	FALSE	0.158084	0.169074	0.181558
S021WTS012	vonBlanckenburg:2004tropical	80.9108	6.94681	0.0598415	1833	mt	0.25015	0.01839	0.262358	0.262358	0	FALSE	0.086344	0.0770801	0.0878793
S137WTS005	Molliex:2016lion	6.109	45.7044	0.0420521	1588	sm	0.33411	0.4348	0.337887	0.337887	0	FALSE	0.144161	0.169427	0.111663
S127WTS017	Kober:2015bolivian	-66.3323	-18.0506	0.0569111	972	sm	0.275	0.06997	0.31823	0.31823	0.389875	FALSE	0.0935121	0.0971051	0.0885579
S188WTS042	Reber:2017peruvian	-69.2426	-19.1977	0.0559583	467	vi	0.20424	0.03418	0.224792	0.224792	0	FALSE	0.101013	0.0425233	0.127948
S121WTS026	Dixon:2016alps	14.5551	47.4079	0.00650069	1574	sc	0.43973	0.23156	0.447874	0.447874	0	FALSE	0.146158	0.151756	0.127029
S104WTS014	Scherler:2013garhwal	78.1245	31.2227	0.0506396	1724	mt	0.5723	1.91173	0.579178	0.579178	0.635779	FALSE	0.323055	0.459394	0.408631
S086WTS013	Godard:2012marsyandi	83.9903	28.6816	0.0518031	1922	mt	0.53339	2.72166	0.517993	0.517993	0	FALSE	0.334142	0.346072	0.418509
S151WTS028	Derrieux:2014taiwan	121.012	23.149	0.0538653	3566	sm	0.52497	5.83136	0.539936	0.539936	0.606747	TRUE	0.242954	0.335465	0.318498
S140WTS008	Abrahami:2016sikkim	88.707	27.2408	0.0520187	4499	mt	0.45168	1.04687	0.49102	0.49102	0.55352	FALSE	0.256949	0.202204	0.345757
S186WTS006	Portenga:2019potomac	-77.6751	38.6458	0.0455236	1113	ss	0.03048	0.00631	0.0428618	0.0428618	0	FALSE	0.00468588	0.0065722	0.00851392
S206WTS002	Val:2018andes	-68.7084	-29.9302	0.0503326	285	sm	0.22296	0.11756	0.246346	0.246346	0	FALSE	0.0770308	0.099831	0.0677822
S161WTS011	Vanacker:2015transient	-78.5344	-2.86355	0.0576903	2078	mt	0.46836	0.11364	0.495852	0.495852	0.568014	FALSE	0.240163	0.22175	0.318984
S149WTS034	Gonzalez:2016panamanian	-81.6389	8.4223	0.0569146	5335	va	0.25057	0.0561	0.267063	0.267063	0	FALSE	0.0876444	0.076299	0.0713073
S159WTS002	Acosta:201vegetation	36.7839	-1.41813	0.0574847	821	vi	0.04626	0.00106	0.0588328	0.0588328	0.05571	FALSE	0.0139434	0.00831901	0.0113918
S026WTS073	Reuter:2005susquehanna	-77.4555	40.9973	0.000344322	1188	ss	0.22265	0.03105	0.274193	0.274193	0	FALSE	0.0195427	0.0640756	0.023409
S104WTS022	Scherler:2013garhwal	77.969	31.2991	0.0488076	1945	mt	0.5141	0.36039	0.520673	0.520673	0	FALSE	0.28622	0.264647	0.320951
S097WTS012	Buechi:2014nunatak	8.91171	47.3037	0.00142778	1953	sm	0.2206	0.01896	0.2384	0.2384	0	FALSE	0.0599123	0.0493247	0.0364232
S121WTS025	Dixon:2016alps	15.2455	47.5658	0.038466	1472	sc	0.40491	0.11959	0.424726	0.424726	0	FALSE	0.126878	0.213566	0.122345
S261WTS016	Riley:2020staircase	-112.497	37.3004	0.0451729	412	ss	0.14079	0.29582	0.152214	0.152214	0	FALSE	0.0338114	0.0754391	0.0298721
S226WTS015	Tofelde:2018hillslope	-65.742	-24.3479	0.00639653	1697	mt	0.27043	0.0559175	0.276242	0.276242	0	TRUE	0.130141	0.0490231	0.0953945
S104WTS011	Scherler:2013garhwal	77.6382	30.9576	0.0485826	1795	mt	0.4995	0.25283	0.5285	0.5285	0	FALSE	0.216066	0.210531	0.238538
S023WTS030	Bierman:2005fpuerco	-107.536	35.4264	0.0461058	335	ss	0.09312	0.04308	0.0997849	0.0997849	0	FALSE	0.0326405	0.0179898	0.0238813
S115WTS045	Adams:2016bhutan	89.7178	27.4719	0.00514236	1387	mt	0.38439	0.06106	0.404253	0.404253	0	FALSE	0.156271	0.124178	0.132238
S156WTS022	Reusser:2015landscape	-83.5223	34.867	0.0463167	1924	mt	0.20145	0.01354	0.219055	0.219055	0	FALSE	0.0389162	0.0597325	0.0378373
S188WTS036	Reber:2017peruvian	-77.9403	-9.78291	0.0555306	460	vi	0.3547	0.03561	0.400378	0.400378	0	FALSE	0.184905	0.14707	0.225477
S039WTS036	Sullivan:2007blue	-82.2027	35.5738	0.0047117	1556	mt	0.18	0.016535	0.197665	0.197665	0	TRUE	0.0340325	0.0535095	0.0320554
S038WTS031	Bierman:2007namibian	16.8728	-21.8422	0.0522012	357	pa	0.0242	0.00683	0.0291977	0.0291977	0	FALSE	0.00487574	0.00324973	0.00545177
S164WTS045	Mandal:2015indian	74.8696	13.813	0.00808125	6258	mt	0.18368	0.01403	0.214263	0.214263	0	FALSE	0.0559508	0.106416	0.0512055
S127WTS037	Kober:2015bolivian	-64.6343	-17.9297	0.0534215	847	sm	0.27767	0.04011	0.311529	0.311529	0	FALSE	0.100135	0.0854222	0.0782624
S183WTS012	Kim:2017seti	83.9619	28.4095	0.0489326	3711	mt	0.60423	0.3927	0.492038	0.492038	0	FALSE	0.347317	0.244446	0.520939
S026WTS055	Reuter:2005susquehanna	-77.2412	40.9369	0.000335138	1404	mt	0.05918	0.00643	0.0582366	0.0582366	0	FALSE	0.00888921	0.00376574	0.00665813
S147WTS001	Larsen:2014rapid	169.926	-43.65	0.0402299	5609	mt	0.60103	3.45384	0.5902	0.5902	0	FALSE	0.283928	0.562842	0.340149
S253WTS022	Chen:2020morakot	120.692	22.3783	0.00757431	2713	ss	0.46474	0.067185	0.491464	0.491464	0	TRUE	0.151119	0.172197	0.152854
S009WTS014	Schaller:2001european	13.2681	49.0585	0.0362873	1426	mt	0.1309	0.02723	0.173773	0.173773	0	FALSE	0.0566253	0.0221964	0.0318075
S023WTS036	Bierman:2005fpuerco	-107.764	35.3764	0.0445629	294	ss	0.09746	0.02547	0.0927362	0.0927362	0	FALSE	0.0233698	0.0179085	0.0189023
S283WTS027	Delunel:2020alps	7.7641	46.0087	0.0377064	1721	mt	0.4401	1.8845	0.477265	0.477265	0	TRUE	0.284372	0.53858	0.360793
S256WTS007	Starke:2020vegetation	-70.1773	-17.7032	0.0514145	170	sm	0.24312	0.01212	0.286651	0.286651	0	FALSE	0.108644	0.100142	0.106068
S097WTS015	Buechi:2014nunatak	9.17794	47.2427	0.0364493	2133	sm	0.3116	0.04301	0.317066	0.317066	0	FALSE	0.101242	0.144395	0.0844275
S164WTS032	Mandal:2015indian	75.6132	12.859	0.0523167	4012	mt	0.17052	0.03869	0.202269	0.202269	0	FALSE	0.0552698	0.051829	0.0555064
S037WTS024	Wittmann:2007switzerland	8.55631	46.1773	0.0370076	2417	mt	0.5222	0.456245	0.544545	0.544545	0	TRUE	0.209413	0.325674	0.22687
S188WTS016	Reber:2017peruvian	-76.0218	-13.126	0.051975	325	pa	0.31026	0.02525	0.359167	0.359167	0	FALSE	0.152098	0.104466	0.172309
S072WTS009	Dortch:2011ladakh	77.8227	34.2206	0.0360943	575	pa	0.4425	0.0332	0.443271	0.443271	0	FALSE	0.208592	0.100836	0.206131
S022WTS007	Nichols:2005chagres	-79.2586	9.38166	0.000433287	3298	vb	0.12935	0.06181	0.145925	0.145925	0	FALSE	0.0170882	0.0387971	0.0222884
S271WTS031	Brocard:2021guatemala	-91.1674	15.5012	0.0513396	2990	mt	0.40455	0.20231	0.435652	0.435652	0	FALSE	0.167769	0.18198	0.202235
S025WTS049	Safran:2005bolivian	-67.7602	-16.4947	0.0507238	2043	sm	0.63166	0.43439	0.584411	0.584411	0	FALSE	0.367237	0.375717	0.567418
S261WTS031	Riley:2020staircase	-112.363	37.2622	0.0419806	358	ss	0.12543	0.25957	0.133424	0.133424	0	FALSE	0.0278785	0.0520127	0.025222
S062WTS010	Meyer:2008rhenish	8.44261	51.4435	0.0328648	1077	ss	0.08902	0.04092	0.100641	0.100641	0	FALSE	0.0162153	0.0159023	0.0141887
S026WTS017	Reuter:2005susquehanna	-76.1295	39.9809	0.0402814	1155	sc	0.05597	0.02009	0.0632755	0.0632755	0	FALSE	0.00826666	0.0105746	0.0119784
S143WTS019	Wittmann:2016po	8.1703	44.6436	0.037284	829	sc	0.17896	0.18492	0.213483	0.213483	0	FALSE	0.0363325	0.0529879	0.033078
S127WTS011	Kober:2015bolivian	-65.8662	-17.7361	0.0499049	1101	sm	0.15529	0.00761	0.195186	0.195186	0	FALSE	0.0401106	0.0479589	0.0364548
S127WTS025	Kober:2015bolivian	-66.0156	-18.8051	0.0495201	931	sm	0.20383	0.01542	0.235304	0.235304	0	FALSE	0.0610786	0.0540782	0.0490383
S026WTS069	Reuter:2005susquehanna	-77.7923	40.707	0.000322018	1285	mt	0.14305	0.00511	0.136538	0.136538	0	FALSE	0.0448378	0.00527525	0.0144652
S265WTS006	Kim:2020taebaek	128.431	37.8033	0.0411611	2019	mt	0.30787	0.06183	0.376093	0.376093	0	FALSE	0.0803284	0.168503	0.0788582
S103WTS025	Godard:2014himalayan	85.9787	27.8633	0.00619583	3944	mt	0.50877	1.55498	0.518682	0.518682	0	FALSE	0.316393	0.257326	0.468486
S235WTS018	Collignon:2019zagros	53.7105	29.2263	0.0454257	368	sm	0.17644	0.01695	0.2015	0.2015	0	FALSE	0.0728195	0.0596751	0.0652719
S183WTS007	Kim:2017seti	83.966	28.4185	0.0457653	3741	mt	0.6199	0.586681	0.498929	0.498929	0	TRUE	0.364903	0.245016	0.5504
S213WTS002	Neely:2019california	-117.611	34.2149	0.00123264	706	pa	0.53757	1.06494	0.595899	0.595899	0	TRUE	0.237591	0.301461	0.256338
S067WTS003	Placzek:2010atacama	-70.3129	-24.2436	0.0473438	16	pi	0.1361	0.00082	0.143623	0.143623	0	FALSE	0.0531761	0.0260754	0.0347116
S147WTS006	Larsen:2014rapid	171.043	-43.0828	0.0378931	4144	mt	0.56179	9.82871	0.576898	0.576898	0	FALSE	0.253555	0.282661	0.278737
S269WTS012	Bellingham:2020ohau	169.821	-43.9518	0.0371258	3478	mt	0.5591	2.39302	0.556371	0.556371	0	FALSE	0.273022	0.373273	0.265226
S022WTS011	Nichols:2005chagres	-79.4798	9.33384	0.0033671	3261	pa	0.24736	0.12632	0.273665	0.273665	0	FALSE	0.0542059	0.0847295	0.0519649
S127WTS047	Kober:2015bolivian	-63.6493	-19.6438	0.0484403	966	sm	0.17834	0.53764	0.235555	0.235555	0	FALSE	0.0346455	0.129071	0.0463626
S110WTS023	Ansberque:2015longriba	103.539	32.4184	0.00433264	1040	ss	0.49	0.11983	0.516416	0.516416	0	FALSE	0.157628	0.163336	0.155704
S151WTS019	Derrieux:2014taiwan	121.581	24.3828	0.0467861	4220	mt	0.52246	2.59861	0.551435	0.551435	0	FALSE	0.218254	0.435553	0.280084
S224WTS004	Young:2018lucia	-121.859	36.4138	0.00274375	948	pa	0.34944	0.15182	0.362696	0.362696	0	FALSE	0.1032	0.139365	0.0922662
S169WTS006	Dethier:2014rocky	-105.503	40.1525	0.00145833	655	pa	-9.99999	0.0144	0.230163	0.230163	0	FALSE	0.0876511	0.0273643	0.0478672
S164WTS066	Mandal:2015indian	75.6711	13.0566	0.0493993	2870	mt	0.08703	0.01277	0.110478	0.110478	0	FALSE	0.0112038	0.021714	0.0163489
S151WTS008	Derrieux:2014taiwan	121.051	24.1145	0.0457104	3088	ss	0.50645	0.72877	0.535567	0.535567	0	FALSE	0.19223	0.312491	0.225276
S165WTS015	Cyr:2014distinguishing	16.4795	39.1272	0.00147986	1399	mt	0.18089	0.06821	0.216942	0.216942	0	FALSE	0.0363399	0.055613	0.0337968
S165WTS037	Cyr:2014distinguishing	11.198	44.2006	0.0355549	963	sc	0.21917	0.84919	0.245064	0.245064	0	FALSE	0.0727176	0.0626556	0.0500368
S177WTS004	Puchol:2014himalayan	84.268	28.4036	0.00251667	3995	mt	0.5463	1.9245	0.566299	0.566299	0	TRUE	0.328774	0.407197	0.428128
S161WTS013	Vanacker:2015transient	-78.5488	-2.88524	0.0493271	2051	mt	0.46436	0.12809	0.492401	0.492401	0	FALSE	0.226693	0.216932	0.28588
S138WTS007	Molliex:2016mediterranean	9.04413	42.3562	0.0364493	1053	pa	0.35999	0.05642	0.39317	0.39317	0	FALSE	0.140725	0.160909	0.126949
S103WTS020	Godard:2014himalayan	85.1659	27.838	0.00271181	2632	mt	0.42436	0.19004	0.431422	0.431422	0	FALSE	0.160136	0.12938	0.137326
S071WTS035	Henck:2011three	98.8984	28.6597	0.0430234	885	ss	0.50755	0.43007	0.523965	0.523965	0	FALSE	0.25928	0.24905	0.335887
S209WTS005	Rosenkranz:2018shillong	91.71	25.3689	0.0442243	6430	pa	0.25248	0.08352	0.293412	0.293412	0	FALSE	0.120624	0.0988222	0.167198
S057WTS002	Delunel:2010pelvoux	6.21056	44.9395	0.0345455	1991	mt	0.70023	0.68908	0.633244	0.633244	0	FALSE	0.380774	0.797661	0.450037
S111WTS030	Olen:2015arun	87.1484	27.8077	0.0430999	4808	mt	0.58886	2.78575	0.492549	0.492549	0	FALSE	0.355585	0.406295	0.65698
S010WTS028	Kirchner:2001mountain	-115.867	45.6914	0.0338505	1218	mt	0.29389	0.04934	0.308992	0.308992	0	FALSE	0.11502	0.0701736	0.104391
S097WTS006	Buechi:2014nunatak	8.9219	47.328	0.00119514	1929	sm	0.2501	0.17199	0.270669	0.270669	0	FALSE	0.0526244	0.0667741	0.0429508
S265WTS016	Kim:2020taebaek	129.078	37.3259	0.0384701	1479	sc	0.31913	0.06945	0.391998	0.391998	0	FALSE	0.076141	0.179199	0.0790485
S082WTS007	Bookhagen:2012andes	-66.018	-24.4078	0.0440498	517	mt	0.27921	0.0187789	0.289752	0.289752	0	TRUE	0.106869	0.0564706	0.0905888
S026WTS027	Reuter:2005susquehanna	-78.1368	41.3873	0.000318238	1161	ss	0.30663	0.02688	0.320321	0.320321	0.348647	FALSE	0.0481652	0.0594162	0.0416833
S123WTS013	Carretier:2015heterogeneous	-69.9509	-17.6902	0.0457347	331	sm	0.35601	0.04782	0.379073	0.379073	0.444396	FALSE	0.180824	0.108369	0.213527
S071WTS019	Henck:2011three	97.79	31.3809	0.0407166	1007	sm	0.3116	0.04444	0.322346	0.322346	0.360359	FALSE	0.0826757	0.0785214	0.0646066
S127WTS036	Kober:2015bolivian	-64.4281	-17.9624	0.0450229	783	sm	0.20493	0.12292	0.2417	0.2417	0.300757	FALSE	0.0624666	0.0811734	0.0533507
S070WTS001	Palumbo:2010tibet	97.2502	39.6242	0.0364379	609	vb	0.2707	0.07124	0.299441	0.299441	0.386915	FALSE	0.073073	0.12744	0.063703
S159WTS014	Acosta:201vegetation	36.8538	1.80847	0.0471583	610	mt	0.04286	0.00585	0.0497561	0.0497561	0.0469488	FALSE	0.0113193	0.00647019	0.00850956
S018WTS015	Morel:2003wutach	8.34795	47.9656	0.000281633	1329	ss	0.04768	0.01015	0.0657797	0.0657797	0.0863838	FALSE	0.0123001	0.0094229	0.0103609
S156WTS023	Reusser:2015landscape	-83.867	34.6253	0.038766	1703	mt	0.14405	0.00796	0.159026	0.159026	0.176091	FALSE	0.0244884	0.038347	0.0267563
S115WTS014	Adams:2016bhutan	91.2702	27.552	0.00485347	2433	mt	0.56395	0.16374	0.574904	0.574904	0.622364	FALSE	0.376509	0.109639	0.420592
S151WTS017	Derrieux:2014taiwan	120.917	23.3208	0.0432562	4190	sm	0.57565	2.17078	0.599495	0.599495	0.644931	FALSE	0.260196	0.354539	0.333928
S088WTS002	Savi:2014zielbach	11.0242	46.7127	0.0037384	1430	mt	0.5528	1.19508	0.557255	0.557255	0.629569	TRUE	0.350776	0.456721	0.516725
S182WTS047	Schmidt:2016yunnan	100.437	21.8178	0.0434924	1827	pa	0.17987	0.03429	0.20613	0.20613	0.291973	FALSE	0.0422364	0.0785195	0.0429805
S046WTS025	Duxburry:2008shenandoah	-78.2801	38.5491	8.46393e-05	1242	pa	0.1759	0.00879	0.194199	0.194199	0.199726	FALSE	0.048987	0.0201893	0.0208989
S105WTS004	Kai:2015qilian	100.708	38.1715	0.0368153	738	ss	0.4018	0.24066	0.432371	0.432371	0.510783	FALSE	0.122553	0.282004	0.128938
S127WTS035	Kober:2015bolivian	-65.225	-18.3787	0.0435056	598	sm	0.2864	0.05157	0.3352	0.3352	0.417301	FALSE	0.089866	0.119236	0.0769783
S127WTS019	Kober:2015bolivian	-66.636	-18.1143	0.043459	987	vi	0.17353	0.03703	0.205643	0.205643	0.260938	FALSE	0.0617739	0.056864	0.0639371
S194WTS005	Woelfler:2017menderes	28.085	38.1976	0.000152513	683	mt	0.21954	0.03987	0.237134	0.237134	0.336024	FALSE	0.0456224	0.0527972	0.0318797
S108WTS009	Portenga:2015bhutanese	90.1654	27.3995	0.0405875	2596	mt	0.41359	0.44251	0.424455	0.424455	0.488042	FALSE	0.210748	0.205303	0.414703
S156WTS012	Reusser:2015landscape	-78.9761	36.2893	0.0365521	1196	mt	0.0328	0.00259	0.0440222	0.0440222	0.0510476	FALSE	0.00389564	0.00959905	0.0105099
S108WTS017	Portenga:2015bhutanese	90.2432	27.2496	0.0402653	2985	ss	0.6321	0.72279	0.651135	0.651135	0.713119	FALSE	0.344719	0.421831	0.454911
S151WTS034	Derrieux:2014taiwan	120.943	22.9128	0.0412646	3067	sm	0.50213	1.95175	0.525719	0.525719	0.580529	TRUE	0.21093	0.251981	0.271707
S128WTS006	McPhillips:2013cordillera	-75.7321	-13.5284	0.00419792	318	pa	0.38832	0.04131	0.445715	0.445715	0.538155	FALSE	0.145806	0.191571	0.136436
S102WTS010	Li:2014tibetan	94.1151	35.708	0.0363473	466	su	0.22198	0.15293	0.228023	0.228023	0.26183	FALSE	0.0714203	0.0577624	0.0534999
S127WTS010	Kober:2015bolivian	-65.8446	-17.7513	0.0424931	1150	sm	0.16495	0.00454	0.19562	0.19562	0.247561	FALSE	0.0402492	0.0479213	0.0364855
S023WTS021	Bierman:2005fpuerco	-106.946	36.0883	0.0358332	421	ss	0.10502	0.32025	0.117581	0.117581	0.141409	FALSE	0.0388466	0.0244591	0.0311472
S076WTS017	Andermann:2011nepal	84.9233	27.5939	0.0391905	2629	mt	0.46389	8.34307	0.492655	0.492655	0.582606	FALSE	0.149311	0.251987	0.157281
S218WTS018	Matmon:2018namibia	15.6796	-21.6276	0.040884	263	vb	0.1505	0.0063	0.163972	0.163972	0.184356	FALSE	0.0320868	0.0301067	0.0247173
S022WTS006	Nichols:2005chagres	-79.2743	9.37579	0.000105629	3290	pa	0.16959	0.08552	0.194634	0.194634	0.265299	FALSE	0.0174274	0.0455437	0.023213
S009WTS007	Schaller:2001european	12.9927	49.1825	0.0282705	1224	mt	0.17893	0.02497	0.182925	0.182925	0.198693	FALSE	0.0551059	0.0220039	0.0295296
S127WTS018	Kober:2015bolivian	-66.5871	-18.003	0.0415389	890	vi	0.13099	0.02727	0.162924	0.162924	0.219645	FALSE	0.0357577	0.0420684	0.0345804
S069WTS025	Norton:2011alps	10.8355	47.0137	0.0296672	1392	mt	0.54866	0.76323	0.555675	0.555675	0.611704	FALSE	0.303569	0.524509	0.381812
S207WTS008	Stutenbecker:2018rhone	7.96257	46.2429	0.00437083	1427	mt	0.50234	1.29352	0.527983	0.527983	0.566184	FALSE	0.346271	0.205849	0.389102
S135WTS002	Struth:2016colombia	-73.8773	4.60037	0.0429257	2379	sm	0.28081	0.07117	0.29511	0.29511	0.337518	FALSE	0.163616	0.0993874	0.159177
S010WTS001	Kirchner:2001mountain	-115.78	44.3789	0.000131923	1102	pa	0.28049	0.13474	0.307263	0.307263	0.378598	FALSE	0.0908117	0.0584419	0.0594984
S069WTS019	Norton:2011alps	11.1526	47.1707	0.0291468	1514	mt	0.50817	0.56396	0.517699	0.517699	0.560491	FALSE	0.260845	0.318334	0.259147
S037WTS001	Wittmann:2007switzerland	8.06468	45.9719	0.0297923	1728	mt	0.61551	0.71828	0.624206	0.624206	0.676171	FALSE	0.335614	0.450876	0.392486
S207WTS022	Stutenbecker:2018rhone	8.32953	46.5101	0.0294729	2555	mt	0.45692	1.00398	0.486293	0.486293	0.527313	FALSE	0.234708	0.251057	0.247458
S104WTS007	Scherler:2013garhwal	78.3446	30.8526	0.00234444	2371	ss	0.5695	0.2893	0.593248	0.593248	0.642088	FALSE	0.239298	0.242762	0.251015
S207WTS015	Stutenbecker:2018rhone	7.60838	46.155	0.0296604	1252	mt	0.47037	1.6615	0.49928	0.49928	0.54758	FALSE	0.319319	0.31034	0.394604
S075WTS009	Moon:2011washington	-120.95	47.7553	0.0285606	2247	mt	0.41732	0.24415	0.424371	0.424371	0.462726	FALSE	0.165197	0.120434	0.140856
S151WTS021	Derrieux:2014taiwan	121.429	24.2111	0.038609	3272	mt	0.55249	3.35153	0.563359	0.563359	0.677654	FALSE	0.266728	0.430281	0.369718
S115WTS029	Adams:2016bhutan	90.0168	27.3288	0.00237847	1858	pa	0.56077	2.11375	0.547774	0.547774	0.735056	FALSE	0.316521	0.367843	0.32544
S018WTS004	Morel:2003wutach	8.19006	47.8969	0.0283419	1572	mt	0.1218	0.04159	0.177178	0.177178	0.190959	FALSE	0.0359203	0.0340494	0.0304248
S075WTS006	Moon:2011washington	-120.509	47.8038	0.0283048	1260	mt	0.31447	0.1153	0.339322	0.339322	0.381071	FALSE	0.112727	0.071742	0.0993806
S073WTS006	Siame:2011taiwan	121.453	24.5154	0.0379549	3952	ss	0.49556	1.16023	0.524007	0.524007	0.603271	FALSE	0.198299	0.251205	0.214562
S010WTS003	Kirchner:2001mountain	-115.799	44.3543	0.000131002	1003	pa	0.20888	0.0577	0.221695	0.221695	0.287382	FALSE	0.0530863	0.0617448	0.0367548
S009WTS056	Schaller:2001european	3.92431	44.6617	0.0290565	1456	mt	0.11214	0.03263	0.18566	0.18566	0.203631	FALSE	0.0348132	0.0297589	0.0286135
S184WTS004	Penserini:2017cascadia	-123.882	43.6836	0.00193542	2079	ss	0.37245	0.08743	0.445467	0.445467	0.544893	FALSE	0.0622961	0.241305	0.0813325
S196WTS011	Fellin:2017taiwan	120.934	22.9135	0.0380931	3072	mt	0.50595	2.7865	0.529354	0.529354	0.584994	TRUE	0.211449	0.259761	0.276224
S111WTS010	Olen:2015arun	87.3169	27.4267	0.0354018	3207	mt	0.49339	0.40043	0.507062	0.507062	0.561594	FALSE	0.263911	0.273395	0.299251
S069WTS017	Norton:2011alps	11.5169	46.2391	0.00196787	1381	va	0.49305	0.21218	0.50202	0.50202	0.561486	FALSE	0.190883	0.232247	0.199338
S038WTS028	Bierman:2007namibian	16.5457	-21.958	0.0383384	333	pa	0.0245	0.00903	0.0299839	0.0299839	0.0281766	FALSE	0.00607807	0.00360822	0.00629045
S151WTS003	Derrieux:2014taiwan	121.286	24.3726	0.0137319	3456	ss	0.54505	1.69986	0.559303	0.559303	0.64347	TRUE	0.213888	0.292139	0.23893
S193WTS011	Wang:2017wenchuan	103.923	31.4879	0.0350826	1839	pa	0.69843	1.172	0.400829	0.400829	0.71566	TRUE	0.320563	0.354033	0.499282
S200WTS025	Cook:2018gongga	101.869	29.7129	0.00462222	2505	ig	0.45901	3.90496	0.48254	0.48254	0.667524	FALSE	0.304054	0.321074	0.285777
S268WTS012	Adams:2020climate	90.813	26.9286	0.00462639	3395	sm	0.57373	1.53343	0.596835	0.596835	0.669191	FALSE	0.22574	0.384037	0.263924
S151WTS004	Derrieux:2014taiwan	121.311	24.3072	0.0373979	3327	ss	0.52111	3.68492	0.541129	0.541129	0.61383	TRUE	0.1992	0.238167	0.215749
S097WTS003	Buechi:2014nunatak	9.02965	47.3282	0.00259792	1984	sm	0.3111	0.02251	0.33234	0.33234	0.380866	FALSE	0.0569623	0.0963016	0.0513276
S102WTS002	Li:2014tibetan	89.0966	32.9139	0.0344275	429	sc	0.0723	0.00979	0.0747567	0.0747567	0.0780098	FALSE	0.0130004	0.00896862	0.0105068
S186WTS020	Portenga:2019potomac	-76.911	38.78	0.00284097	1163	su	0.02036	0.0053	0.0375847	0.0375847	0.0314287	FALSE	0.00279064	0.00748615	0.0088303
S149WTS011	Gonzalez:2016panamanian	-81.4388	8.36472	0.0403854	4246	va	0.15948	0.05192	0.171158	0.171158	0.223873	FALSE	0.0411156	0.041386	0.0343312
S207WTS014	Stutenbecker:2018rhone	8.22848	46.5106	0.00166181	2663	mt	0.52838	2.50645	0.562855	0.562855	0.610552	TRUE	0.33225	0.330233	0.375361
S261WTS015	Riley:2020staircase	-112.487	37.3455	0.0323639	435	ss	0.1536	0.470197	0.163551	0.163551	0.19922	TRUE	0.034942	0.0791057	0.0311283
S109WTS003	Rades:2015graben	86.7718	31.3737	0.00111111	671	pa	0.48018	0.01206	0.495368	0.495368	0.564197	FALSE	0.177291	0.111553	0.152831
S072WTS003	Dortch:2011ladakh	77.404	34.4143	0.0333869	754	pa	0.4717	0.08937	0.473207	0.473207	0.53245	FALSE	0.205217	0.243826	0.210157
S186WTS014	Portenga:2019potomac	-77.2968	39.4757	0.00107014	1025	mt	0.05456	0.01216	0.0784339	0.0784339	0.0990265	FALSE	0.0078242	0.0158779	0.0130855
S121WTS011	Dixon:2016alps	14.7387	47.002	0.0275882	1051	mt	0.28846	0.09202	0.305195	0.305195	0.337645	FALSE	0.103981	0.0589266	0.0775039
S138WTS010	Molliex:2016mediterranean	9.28111	42.3917	0.0105715	1008	mt	0.32001	0.08239	0.354016	0.354016	0.404876	FALSE	0.118391	0.0943325	0.0917908
S015WTS012	Matmon:2003smoky	-83.2785	35.5939	0.0328593	1648	mt	0.22728	0.03071	0.362885	0.362885	0.422093	TRUE	0.0957906	0.104293	0.0833259
S069WTS033	Norton:2011alps	11.7755	47.049	0.0274419	1619	pa	0.59223	0.84211	0.567903	0.567903	0.639083	FALSE	0.350089	0.607672	0.633769
S086WTS020	Godard:2012marsyandi	84.4358	28.6385	0.0352735	2504	mt	0.65793	4.24722	0.50114	0.50114	0.692064	FALSE	0.416193	0.344958	0.541748
S106WTS004	LeRouxMallouf:2015bhutan	89.8753	27.7458	0.00757153	1334	mt	0.5108	0.264035	0.517117	0.517117	0.607587	TRUE	0.295588	0.394208	0.435841
S218WTS006	Matmon:2018namibia	15.2978	-20.3634	0.0375375	295	mt	0.08331	0.00562	0.105011	0.105011	0.119011	FALSE	0.0152877	0.0233893	0.0157019
S071WTS018	Henck:2011three	97.9531	31.4565	0.0341487	867	ss	0.24873	0.04474	0.25596	0.25596	0.290734	FALSE	0.0613124	0.0538998	0.0454157
S143WTS016	Wittmann:2016po	7.22938	44.6645	0.0283389	1159	mt	0.35923	0.15597	0.392124	0.392124	0.44037	FALSE	0.162122	0.144233	0.156687
S283WTS022	Delunel:2020alps	7.94384	46.0986	0.0275793	1632	mt	0.49379	1.27869	0.528173	0.528173	0.568185	TRUE	0.354301	0.430202	0.46078
S021WTS013	vonBlanckenburg:2004tropical	80.8334	6.94436	0.00761243	2049	mt	0.18785	0.01495	0.224877	0.224877	0.273732	FALSE	0.0773328	0.0626294	0.0876652
S260WTS014	He:2020weihe	109.064	33.9591	0.00429931	1121	sc	0.53913	0.09615	0.591435	0.591435	0.71773	FALSE	0.184269	0.595835	0.20606
S057WTS009	Delunel:2010pelvoux	6.02532	44.9083	0.0280676	1903	sc	0.59044	0.23285	0.619058	0.619058	0.688588	FALSE	0.319198	0.533356	0.350484
S164WTS019	Mandal:2015indian	75.7876	11.7764	0.00503056	4935	pa	0.3311	0.02645	0.370544	0.370544	0.446399	FALSE	0.100666	0.106388	0.0835587
S127WTS039	Kober:2015bolivian	-64.8801	-18.2557	0.0376194	556	sm	0.21528	0.03665	0.258873	0.258873	0.332431	FALSE	0.0539925	0.0836623	0.0486921
S023WTS037	Bierman:2005fpuerco	-108.089	35.5158	0.0321658	323	ss	0.08468	0.0888	0.092026	0.092026	0.107959	FALSE	0.0142894	0.0197923	0.014196
S219WTS007	Balco:2005utah	-109.208	38.6445	0.00280278	359	ss	0.26975	0.11384	0.287318	0.287318	0.303168	FALSE	0.0784873	0.228998	0.0627827
S151WTS025	Derrieux:2014taiwan	121.388	24.013	0.035941	3118	mt	0.56486	4.2604	0.578081	0.578081	0.658561	TRUE	0.271343	0.462717	0.474296
S083WTS011	VandenBerg:2012entlebuch	8.10529	46.9372	0.00655417	1935	sc	0.3401	0.35003	0.351942	0.351942	0.38944	FALSE	0.102851	0.130509	0.0807266
S115WTS016	Adams:2016bhutan	91.0729	27.6774	0.00823958	2355	mt	0.60438	0.18227	0.637584	0.637584	0.700981	FALSE	0.314216	0.348501	0.383923
S230WTS011	Grin:2018tajikistan	70.0084	39.1093	0.0304354	1098	sm	0.50639	0.58342	0.555436	0.555436	0.612803	FALSE	0.272876	0.269141	0.327788
S069WTS009	Norton:2011alps	9.99036	46.1101	0.00328973	1697	mt	0.60098	1.09307	0.60684	0.60684	0.658314	FALSE	0.348764	0.445546	0.416903
S253WTS015	Chen:2020morakot	120.777	22.7448	0.0358729	2987	ss	0.52262	4.61833	0.553286	0.553286	0.612241	TRUE	0.215589	0.310311	0.252079
S130WTS005	Schildgen:2016argentina	-65.5325	-23.6129	0.00430486	889	mt	0.32978	0.0437785	0.34915	0.34915	0.399136	TRUE	0.139025	0.0596763	0.0998605
S097WTS007	Buechi:2014nunatak	9.00839	47.3641	0.00316806	1734	sm	0.2489	0.01356	0.270455	0.270455	0.313575	FALSE	0.0409557	0.0636534	0.0387669
S193WTS047	Wang:2017wenchuan	103.305	30.7863	0.0333556	2079	sc	0.51309	0.214435	0.539323	0.539323	0.614345	TRUE	0.200043	0.372782	0.226429
S169WTS005	Dethier:2014rocky	-105.431	39.9628	0.00106181	505	pa	-9.99999	0.02199	0.151893	0.151893	0.172206	FALSE	0.0293393	0.0207237	0.0194905
S127WTS030	Kober:2015bolivian	-64.2249	-18.5178	0.0367049	778	sm	0.31223	0.02553	0.348246	0.348246	0.414702	FALSE	0.128578	0.0934866	0.127155
S071WTS044	Henck:2011three	96.8017	29.7009	0.0336038	1210	sm	0.42396	0.42263	0.42497	0.42497	0.473979	FALSE	0.134334	0.172604	0.12296
S019WTS005	Perg:2003cruz	-122.083	37.1289	0.0308179	882	ss	0.222	0.15643	0.243602	0.243602	0.286769	FALSE	0.0496298	0.0789641	0.0483423
S087WTS002	Scharf:2013strong	20.6601	-33.9055	0.0320436	587	ss	0.22094	0.00399	0.233216	0.233216	0.276735	FALSE	0.0638168	0.0593494	0.0524806
S230WTS010	Grin:2018tajikistan	69.6339	38.7266	0.0300743	945	pa	0.3017	0.14228	0.349136	0.349136	0.421739	FALSE	0.116409	0.147853	0.105944
S177WTS023	Puchol:2014himalayan	84.3037	28.3858	0.0086618	3683	pa	0.54894	1.14179	0.554353	0.554353	0.587896	TRUE	0.356826	0.320698	0.47286
S022WTS014	Nichols:2005chagres	-79.3904	9.32682	0.0379539	3239	pa	0.20968	0.12086	0.248687	0.248687	0.322644	FALSE	0.0490193	0.0780991	0.0468849
S179WTS008	DeLong:2017andreas	-123.242	38.6835	0.0299604	1413	ss	0.24169	0.16152	0.292265	0.292265	0.356698	FALSE	0.0509685	0.094731	0.0518255
S260WTS019	He:2020weihe	108.41	33.9957	0.00425278	905	mt	0.52554	0.13834	0.573098	0.573098	0.700161	FALSE	0.163287	0.418824	0.176
S108WTS031	Portenga:2015bhutanese	89.9581	28.0758	0.0337979	1056	mt	0.51484	1.33772	0.508083	0.508083	0.573865	FALSE	0.25793	0.41848	0.32914
S069WTS027	Norton:2011alps	10.8788	46.7267	0.0259848	1328	mt	0.5544	0.65683	0.563231	0.563231	0.611412	FALSE	0.306043	0.288154	0.382128
S064WTS007	Godard:2010regressive	103.802	31.3366	0.0318696	1638	vi	0.6819	0.18253	0.320028	0.320028	0.701311	FALSE	0.283716	0.127917	0.360171
S218WTS019	Matmon:2018namibia	15.6758	-21.6427	0.0352021	261	vb	0.14929	0.00576	0.162433	0.162433	0.182036	FALSE	0.0304107	0.0303462	0.0236733
S025WTS028	Safran:2005bolivian	-68.1289	-16.1458	0.0363082	2726	sm	0.56235	0.34985	0.552711	0.552711	0.626128	FALSE	0.313009	0.374232	0.537525
S135WTS013	Struth:2016colombia	-73.3685	5.41896	0.0375014	1354	sm	0.18085	0.04678	0.192504	0.192504	0.230486	FALSE	0.0824367	0.0401325	0.0618407
S025WTS012	Safran:2005bolivian	-68.4144	-15.4813	0.0362926	1937	sm	0.51687	0.16679	0.556973	0.556973	0.620898	FALSE	0.243983	0.247135	0.315352
S023WTS009	Bierman:2005fpuerco	-107.432	35.2273	0.0306772	335	vb	0.09287	0.12525	0.102573	0.102573	0.113783	FALSE	0.0395409	0.0181384	0.0348092
S023WTS026	Bierman:2005fpuerco	-107.172	35.9391	0.0300903	321	ss	0.03903	0.22199	0.0456235	0.0456235	0.0501181	FALSE	0.00667228	0.00714925	0.00832249
S167WTS008	Matsushi:2014yield	137.788	36.4125	5.625e-05	2341	pa	0.57204	0.70884	0.630652	0.630652	0.71606	FALSE	0.10253	0.203104	0.0868557
S164WTS010	Mandal:2015indian	76.4164	11.4291	0.036775	3005	mt	0.20808	0.03262	0.239568	0.239568	0.285184	FALSE	0.0946799	0.0853286	0.0976413
S119WTS016	Glotzbach:2016kruger	31.452	-23.9331	0.00210625	531	mt	0.02492	0.00815	0.0309502	0.0309502	0.031277	FALSE	0.00411607	0.00169683	0.00439955
S065WTS003	Guralnik:2010pavements	34.8302	30.5759	0.0322986	91	sc	0.0951	0.02501	0.103321	0.103321	0.137067	FALSE	0.0167179	0.0304237	0.0171467
S022WTS001	Nichols:2005chagres	-79.2878	9.37361	0.00504498	3268	pa	0.18998	0.089775	0.190038	0.190038	0.240372	TRUE	0.0315365	0.0538408	0.0316413
S264WTS010	Kim:2016korean	129.245	36.3858	0.0301757	1276	ss	0.2657	0.11981	0.333337	0.333337	0.438408	FALSE	0.0549001	0.161915	0.061842
S134WTS010	West:2014dilution	103.543	31.3157	0.00150556	1269	pa	-9.99999	0.29151	0.715871	0.715871	0.732747	FALSE	0.308631	0.41011	0.394753
S038WTS021	Bierman:2007namibian	16.3992	-21.034	0.0343921	435	ss	0.0635	0.00701	0.0678923	0.0678923	0.0713956	FALSE	0.0164909	0.01216	0.0127223
S023WTS015	Bierman:2005fpuerco	-107.235	35.3259	0.0300053	372	ss	0.11138	0.10695	0.120895	0.120895	0.145405	FALSE	0.032339	0.0276984	0.0247379
S025WTS048	Safran:2005bolivian	-67.4961	-16.4464	0.0352644	1648	sm	0.48436	0.22214	0.508361	0.508361	0.56343	FALSE	0.241965	0.139241	0.270634
S086WTS026	Godard:2012marsyandi	84.5483	28.2935	0.0323635	3772	mt	0.57893	1.62435	0.584251	0.584251	0.641135	FALSE	0.395826	0.293979	0.587675
S101WTS007	Munack:2014outpaced	76.6578	34.6589	0.0300814	534	pa	0.4826	0.09294	0.494307	0.494307	0.559919	FALSE	0.230724	0.224781	0.280978
S102WTS006	Li:2014tibetan	95.0237	35.9586	0.0293682	291	sc	0.39773	0.07229	0.416667	0.416667	0.503173	FALSE	0.11678	0.196871	0.1089
S064WTS012	Godard:2010regressive	104.042	31.5986	0.030119	1913	sm	0.6001	0.672734	0.501886	0.501886	0.666092	TRUE	0.289733	0.41173	0.41657
S215WTS013	Kober:2012debris	8.25795	46.5993	0.0247035	2247	pa	0.57716	1.74213	0.578176	0.578176	0.622594	TRUE	0.302856	0.714933	0.368078
S009WTS062	Schaller:2001european	3.27671	47.2474	0.0238188	941	sc	0.04959	0.00531	0.0551996	0.0551996	0.0575275	FALSE	0.00840347	0.00667289	0.00905459
S121WTS005	Dixon:2016alps	14.9654	47.2107	0.00968681	1009	mt	0.36301	0.0861	0.390947	0.390947	0.44848	TRUE	0.102475	0.117233	0.0891394
S069WTS010	Norton:2011alps	11.3237	46.1023	0.00928423	1158	va	0.41153	0.29915	0.425511	0.425511	0.469244	FALSE	0.192311	0.107663	0.175066
S121WTS009	Dixon:2016alps	15.0826	46.8626	0.00855139	1081	mt	0.26312	0.04852	0.281294	0.281294	0.319308	FALSE	0.101835	0.0570744	0.0743562
S121WTS027	Dixon:2016alps	13.7663	47.3197	0.00792431	1745	mt	0.60012	0.18708	0.603976	0.603976	0.658755	FALSE	0.275497	0.601527	0.319013
S103WTS001	Godard:2014himalayan	85.0452	27.6907	0.0101681	2764	mt	0.4357	0.16394	0.470027	0.470027	0.56596	FALSE	0.154981	0.214456	0.156961
S182WTS016	Schmidt:2016yunnan	100.738	24.1658	0.0104424	1429	ss	0.40345	0.122923	0.449722	0.449722	0.570522	TRUE	0.100044	0.194529	0.0982574
S139WTS026	Olivetti:2016massif	4.73685	44.9604	0.00809028	1167	mt	0.14158	0.03397	0.158608	0.158608	0.184463	FALSE	0.0300216	0.0318302	0.0254982
S069WTS037	Norton:2011alps	9.90664	46.0902	0.00770286	1863	mt	0.6205	0.85215	0.0127156	0.0127156	0.0276155	FALSE	0.345647	0.369194	0.38861
S115WTS019	Adams:2016bhutan	89.6924	27.6766	0.00982431	1093	mt	0.52916	0.313292	0.553803	0.553803	0.610705	TRUE	0.307725	0.269306	0.365655
S253WTS019	Chen:2020morakot	120.702	22.5578	0.0102444	2939	ss	0.54105	0.940638	0.550979	0.550979	0.614438	TRUE	0.244201	0.224587	0.26769
S038WTS002	Bierman:2007namibian	16.0505	-23.4824	6.39612e-05	173	mt	0.2215	0.00489	0.223746	0.223746	0.342584	FALSE	0.0171503	0.0684375	0.0249423
S183WTS014	Kim:2017seti	83.9983	28.4424	0.0315514	3797	mt	0.6759	0.399291	0.49989	0.49989	0.696834	TRUE	0.409653	0.254951	0.662846
S106WTS001	LeRouxMallouf:2015bhutan	89.8031	27.7774	0.00694444	1219	mt	0.50975	0.21866	0.544752	0.544752	0.584477	FALSE	0.297357	0.33424	0.445447
S082WTS037	Bookhagen:2012andes	-65.775	-25.1829	0.0324125	834	sm	0.38008	0.60886	0.403291	0.403291	0.486298	FALSE	0.166996	0.14838	0.170814
S110WTS022	Ansberque:2015longriba	103.524	32.289	0.00662917	1230	ss	0.471	0.18437	0.495053	0.495053	0.551378	FALSE	0.157095	0.133841	0.145906
S108WTS037	Portenga:2015bhutanese	89.8933	27.8954	0.00938333	1462	mt	0.36343	0.67708	0.375472	0.375472	0.419097	FALSE	0.120683	0.24051	0.135994
S253WTS013	Chen:2020morakot	120.829	22.2901	0.0044875	2754	ss	0.30392	0.2765	0.331899	0.331899	0.415028	FALSE	0.0849094	0.111014	0.0734415
S174WTS003	Barreto:2014diamantina	-43.7607	-17.9769	0.00456667	1264	ss	0.15333	0.0182457	0.180752	0.180752	0.222061	TRUE	0.0404505	0.04429	0.0322012
S139WTS022	Olivetti:2016massif	4.36668	45.2184	0.0249486	1026	pa	0.1411	0.04122	0.162746	0.162746	0.17541	FALSE	0.0359583	0.0334287	0.0307644
S115WTS027	Adams:2016bhutan	90.0127	27.4359	0.00559792	2413	mt	0.29697	0.02891	0.297471	0.297471	0.344681	FALSE	0.0991241	0.107901	0.0710303
S125WTS002	Pepin:2013tunas	-69.6085	-33.2438	0.0295903	857	sm	0.49149	0.25198	0.516039	0.516039	0.565779	FALSE	0.256712	0.125606	0.274343
S121WTS021	Dixon:2016alps	14.0374	47.2973	0.00697292	1596	mt	0.52705	0.24422	0.528014	0.528014	0.578663	FALSE	0.218013	0.239874	0.218935
S193WTS007	Wang:2017wenchuan	103.915	31.4991	0.0298639	1838	pa	0.72135	1.10963	0.358885	0.358885	0.730031	TRUE	0.337169	0.31995	0.54732
S165WTS030	Cyr:2014distinguishing	16.6743	39.419	0.00571806	1091	mt	0.33981	0.50378	0.384328	0.384328	0.451262	FALSE	0.128722	0.105912	0.109736
S008WTS001	Bierman:2001namib	16.4756	-23.2574	0.00579172	268	pa	0.039	0.00399	0.0461751	0.0461751	0.051827	FALSE	0.00519546	0.00488623	0.00743464
S030WTS005	Vanacker:2007escarpment	80.7729	6.79834	6.86504e-05	2579	mt	0.23426	0.00198	0.241054	0.241054	0.338468	FALSE	0.0218735	0.0419124	0.0227084
S220WTS015	Balco:2013pacific	-123.73	44.5494	0.0249451	2383	ss	0.26911	0.11805	0.299309	0.299309	0.373521	FALSE	0.0462325	0.124897	0.0535514
S164WTS056	Mandal:2015indian	76.7773	11.3571	0.0108062	1498	pa	0.26146	0.01924	0.298938	0.298938	0.343523	FALSE	0.139542	0.0992516	0.215448
S022WTS002	Nichols:2005chagres	-79.3777	9.33536	0.0334639	3262	pa	0.23058	0.14045	0.249933	0.249933	0.322182	FALSE	0.0495746	0.0778748	0.0470028
S170WTS011	Hurst:2012curvature	-121.314	39.687	0.000140278	2106	pa	0.16526	0.01967	0.169138	0.169138	0.190347	FALSE	0.0358112	0.0140136	0.0201974
S009WTS011	Schaller:2001european	13.2334	49.1047	0.0197316	1374	mt	0.18341	0.0262596	0.187636	0.187636	0.208393	TRUE	0.0654846	0.0224947	0.0351943
S164WTS065	Mandal:2015indian	75.515	12.37	0.00114028	5823	pa	0.17903	0.02092	0.205455	0.205455	0.253166	FALSE	0.0328083	0.0436869	0.0287331
S036WTS004	Reinhardt:2007spain	-3.47824	36.9953	0.000144997	809	mt	0.32888	1.53749	0.330832	0.330832	0.347744	FALSE	0.253584	0.0223101	0.195292
S071WTS038	Henck:2011three	98.0994	29.6257	0.0301966	1032	pa	0.41643	0.01556	0.421461	0.421461	0.463233	FALSE	0.144167	0.0949447	0.155953
S057WTS003	Delunel:2010pelvoux	6.30918	45.0392	0.0243363	1779	sc	0.53315	1.02584	0.513919	0.513919	0.578699	FALSE	0.267193	0.581661	0.335095
S207WTS001	Stutenbecker:2018rhone	8.34985	46.4709	0.0042875	2633	mt	0.43244	0.77359	0.468725	0.468725	0.517495	FALSE	0.208679	0.264584	0.228104
S161WTS014	Vanacker:2015transient	-78.6539	-2.40779	0.0342826	1904	py	0.35471	0.19679	0.368626	0.368626	0.414936	FALSE	0.17327	0.120574	0.22523
S255WTS002	Charreau:2017tianshan	84.0768	43.1188	0.00445764	530	ss	0.37591	0.09481	0.408584	0.408584	0.457991	FALSE	0.119719	0.10693	0.0950899
S207WTS012	Stutenbecker:2018rhone	8.01745	46.4669	0.0231472	2351	ig	0.41495	2.93715	0.456855	0.456855	0.4989	FALSE	0.229167	0.502925	0.270104
S110WTS031	Ansberque:2015longriba	103.345	32.3253	0.00659236	1073	ss	0.4922	0.10091	0.525738	0.525738	0.588927	FALSE	0.157151	0.219628	0.158768
S151WTS010	Derrieux:2014taiwan	121.117	24.1293	0.030566	3160	ss	0.57493	1.38035	0.603018	0.603018	0.673017	FALSE	0.238104	0.359902	0.289463
S271WTS006	Brocard:2021guatemala	-90.1313	15.0787	0.00450694	2291	mt	0.24125	0.03174	0.262319	0.262319	0.323827	FALSE	0.0723822	0.0758009	0.0575163
S165WTS041	Cyr:2014distinguishing	11.1774	44.1604	0.0240069	1021	sc	0.21953	0.55649	0.243965	0.243965	0.277056	FALSE	0.0741311	0.0599291	0.0503644
S193WTS027	Wang:2017wenchuan	103.747	31.3285	0.0121771	1572	vi	0.81279	0.59533	0.294163	0.294163	0.779704	TRUE	0.343864	0.0855202	0.438828
S235WTS008	Collignon:2019zagros	53.5784	28.9288	0.0289451	391	sc	0.11037	0.05952	0.133386	0.133386	0.163235	FALSE	0.0394673	0.0492412	0.0295244
S260WTS001	He:2020weihe	110.107	34.4705	0.00362986	906	pa	0.58178	0.1133	0.510533	0.510533	0.691628	FALSE	0.183078	0.498909	0.219622
S275WTS006	Vermeesch:2018macedonia	21.9187	41.1677	0.00323681	822	mt	0.28526	0.10952	0.307902	0.307902	0.356537	FALSE	0.10022	0.0770918	0.0808716
S183WTS001	Kim:2017seti	84.0013	28.4535	0.0288111	3836	mt	0.7	0.90762	0.506166	0.506166	0.716227	FALSE	0.433838	0.26011	0.711007
S082WTS036	Bookhagen:2012andes	-65.7839	-25.1853	0.0296034	835	mt	0.37174	0.29507	0.395243	0.395243	0.477275	FALSE	0.165763	0.148157	0.170281
S104WTS001	Scherler:2013garhwal	78.0934	30.5884	0.00943403	2571	ss	0.4761	0.47296	0.503458	0.503458	0.583198	FALSE	0.184979	0.154747	0.19285
S039WTS035	Sullivan:2007blue	-82.2329	35.6058	0.00349286	1552	mt	0.211	0.022155	0.247074	0.247074	0.296215	TRUE	0.0450839	0.0751942	0.0439027
S220WTS016	Balco:2013pacific	-123.716	44.6556	0.0232153	2493	ss	0.2444	0.1146	0.262194	0.262194	0.328342	FALSE	0.0339352	0.111753	0.0434797
S111WTS021	Olen:2015arun	87.3913	27.261	0.0286534	2349	mt	0.41789	0.4663	0.432386	0.432386	0.475282	FALSE	0.260116	0.0915219	0.255868
S086WTS005	Godard:2012marsyandi	84.5914	28.1828	0.0284062	3250	mt	0.42009	0.58598	0.43453	0.43453	0.485349	FALSE	0.228615	0.124148	0.244569
S264WTS005	Kim:2016korean	129.189	37.1382	0.0256437	1471	pb	0.3328	0.04925	0.410914	0.410914	0.539595	FALSE	0.0844988	0.204798	0.0863433
S265WTS015	Kim:2020taebaek	129.019	37.4912	0.00991458	1667	pb	0.31189	0.05317	0.372535	0.372535	0.470571	FALSE	0.0882063	0.13985	0.0835891
S159WTS019	Acosta:201vegetation	36.6987	1.95484	0.0320931	767	vi	0.11699	0.01684	0.137874	0.137874	0.170142	FALSE	0.0405494	0.0339277	0.0339134
S145WTS002	Byun:2015korean	128.7	37.7653	0.000134028	2467	pa	0.12934	0.06343	0.141137	0.141137	0.184717	FALSE	0.017186	0.0291824	0.0170842
S261WTS044	Riley:2020staircase	-112.04	37.6607	0.025384	313	ss	0.20297	0.29554	0.21866	0.21866	0.278978	FALSE	0.0446377	0.119964	0.0447535
S096WTS014	Glotzbach:2013glacially	6.95018	44.7765	0.0226283	1141	mt	0.4723	0.40785	0.477248	0.477248	0.52334	FALSE	0.217107	0.177389	0.198078
S271WTS023	Brocard:2021guatemala	-90.7817	15.1187	0.00414028	1976	mt	0.31139	0.02293	0.340259	0.340259	0.42239	FALSE	0.121337	0.107612	0.125317
S209WTS004	Rosenkranz:2018shillong	91.3672	25.3551	0.0287389	6554	pa	0.2452	0.06496	0.293728	0.293728	0.361132	FALSE	0.105937	0.111424	0.12862
S146WTS008	Burdis:2016nelson	172.836	-41.699	0.0237438	1440	su	0.22394	0.19809	0.245442	0.245442	0.290742	FALSE	0.0537436	0.0616077	0.043216
S082WTS024	Bookhagen:2012andes	-65.7127	-25.441	0.0286587	758	sm	0.37503	0.37187	0.413507	0.413507	0.511613	FALSE	0.125417	0.16682	0.120159
S151WTS007	Derrieux:2014taiwan	120.884	24.1055	0.00696944	2950	ss	0.34253	0.70387	0.367779	0.367779	0.46111	FALSE	0.0942866	0.141614	0.0795349
S164WTS009	Mandal:2015indian	76.2154	11.4976	0.0310035	3044	mt	0.22727	0.04214	0.271388	0.271388	0.327002	FALSE	0.10167	0.108692	0.138941
S026WTS008	Reuter:2005susquehanna	-77.8086	40.7999	0.0239238	1117	sc	0.08059	0.01321	0.0868108	0.0868108	0.0929143	FALSE	0.0144144	0.0128574	0.0129039
S103WTS015	Godard:2014himalayan	83.7767	28.2576	0.00375278	3166	mt	0.36339	0.68363	0.355382	0.355382	0.393356	FALSE	0.168394	0.0892096	0.137977
S209WTS011	Rosenkranz:2018shillong	91.8055	25.3181	0.0285431	6554	mt	0.4369	0.06556	0.494706	0.494706	0.563034	FALSE	0.176395	0.230204	0.198475
S057WTS012	Delunel:2010pelvoux	6.19914	44.8141	0.0223983	1786	mt	0.65614	0.55434	0.633927	0.633927	0.690882	FALSE	0.330469	0.595664	0.362282
S108WTS022	Portenga:2015bhutanese	89.8166	27.4478	0.006675	1479	mt	0.47197	0.11622	0.493721	0.493721	0.558794	TRUE	0.240075	0.20486	0.241229
S139WTS019	Olivetti:2016massif	4.47134	45.0603	0.0221236	1216	mt	0.25156	0.05286	0.276822	0.276822	0.30538	FALSE	0.06579	0.0589475	0.0529938
S037WTS035	Wittmann:2007switzerland	8.80275	46.316	0.0215786	2387	mt	0.68969	0.475375	0.62707	0.62707	0.748458	TRUE	0.362296	0.70739	0.414535
S141WTS002	Munack:2016indus	78.1308	33.0756	0.0260674	555	mt	0.27612	0.02353	0.281352	0.281352	0.300845	FALSE	0.113073	0.036742	0.0832187
S200WTS002	Cook:2018gongga	102.026	29.8462	0.0132493	2211	pa	0.40328	0.97447	0.446442	0.446442	0.485538	FALSE	0.246227	0.169445	0.291441
S149WTS019	Gonzalez:2016panamanian	-80.1492	8.83877	0.0307139	2879	va	0.14671	0.03699	0.162961	0.162961	0.214231	FALSE	0.0285851	0.0527498	0.0300313
S025WTS050	Safran:2005bolivian	-67.8418	-16.352	0.0297599	2280	sm	0.63791	0.56636	0.576729	0.576729	0.678744	FALSE	0.374729	0.375575	0.546926
S082WTS034	Bookhagen:2012andes	-65.9717	-24.9905	0.027995	940	su	0.2108	0.0356	0.230576	0.230576	0.265511	FALSE	0.103883	0.0569116	0.0870673
S271WTS020	Brocard:2021guatemala	-90.6663	15.1586	0.00184097	1710	mt	0.28947	0.04646	0.318571	0.318571	0.406972	FALSE	0.0691944	0.0995089	0.060376
S075WTS013	Moon:2011washington	-121.234	47.8265	0.0207363	3311	mt	0.44117	0.35333	0.448109	0.448109	0.489155	FALSE	0.167216	0.111384	0.146704
S151WTS009	Derrieux:2014taiwan	120.939	23.9521	0.0280736	3166	ss	0.28517	0.1712	0.305173	0.305173	0.368544	FALSE	0.0713351	0.140549	0.0705478
S115WTS007	Adams:2016bhutan	90.6235	27.5198	0.00971389	2312	mt	0.30801	0.07938	0.311805	0.311805	0.371348	FALSE	0.115434	0.0646476	0.0813483
S023WTS034	Bierman:2005fpuerco	-107.832	35.4254	0.0249517	284	ss	0.06847	0.03446	0.0749799	0.0749799	0.0850931	FALSE	0.0115649	0.016013	0.0128562
S022WTS010	Nichols:2005chagres	-79.3657	9.3358	0.0299734	3262	pa	0.25284	0.1117	0.246797	0.246797	0.3194	FALSE	0.0493228	0.0763663	0.0462038
S125WTS001	Pepin:2013tunas	-69.6254	-33.2393	0.0250667	891	sm	0.49712	0.28779	0.520817	0.520817	0.569993	FALSE	0.262393	0.132139	0.278637
S261WTS037	Riley:2020staircase	-112.233	37.3113	0.024159	347	ss	0.13129	0.06267	0.141907	0.141907	0.17283	TRUE	0.0310879	0.0580725	0.0265731
S265WTS004	Kim:2020taebaek	128.388	38.0223	0.00378056	1774	pa	0.28831	0.09381	0.345327	0.345327	0.428403	FALSE	0.081211	0.128758	0.0694779
S282WTS007	Grischott:2017stappitz	13.2606	47.0203	0.00327054	2019	pa	0.59849	0.484688	0.645986	0.645986	0.712255	TRUE	0.354009	0.727489	0.381273
S264WTS006	Kim:2016korean	129.256	36.8444	0.0242396	1378	pb	0.25677	0.06267	0.330164	0.330164	0.446165	FALSE	0.0561122	0.162527	0.0634427
S149WTS004	Gonzalez:2016panamanian	-80.7162	8.43802	0.0297396	3565	vi	0.18368	0.0195	0.197879	0.197879	0.254715	FALSE	0.0561937	0.0598081	0.047243
S213WTS007	Neely:2019california	-117.609	34.2284	5.69444e-05	705	mt	0.55639	0.60251	0.63607	0.63607	0.735948	FALSE	0.220355	0.125438	0.180095
S149WTS016	Gonzalez:2016panamanian	-82.2345	8.8489	0.0294764	3656	va	0.33126	0.19629	0.359889	0.359889	0.410112	FALSE	0.127359	0.147348	0.11856
S093WTS007	Regalla:2013tohoku	140.792	37.458	0.0236126	1708	pa	0.17981	0.08562	0.208112	0.208112	0.259682	FALSE	0.0434694	0.0732469	0.0434904
S265WTS003	Kim:2020taebaek	128.34	38.0586	0.00860556	1783	pa	0.28938	0.05021	0.357366	0.357366	0.435937	FALSE	0.0753651	0.157319	0.0704457
S108WTS007	Portenga:2015bhutanese	90.1989	27.4156	0.0262167	2674	mt	0.39019	0.2362	0.401169	0.401169	0.457679	FALSE	0.188993	0.169619	0.398965
S069WTS014	Norton:2011alps	12.4211	47.205	0.00843491	1582	mt	0.55809	1.00366	0.556154	0.556154	0.615805	TRUE	0.345159	0.382009	0.358096
S271WTS027	Brocard:2021guatemala	-91.2054	15.4537	0.0284625	2862	ss	0.36325	0.03302	0.390248	0.390248	0.448247	FALSE	0.155677	0.146292	0.172652
S139WTS008	Olivetti:2016massif	4.4262	45.1883	0.00768958	1108	mt	0.16427	0.0362	0.18956	0.18956	0.206297	FALSE	0.0405248	0.0347418	0.0326752
S127WTS034	Kober:2015bolivian	-64.9161	-18.9888	0.027916	635	sm	0.22886	0.01128	0.271184	0.271184	0.3429	FALSE	0.0730582	0.0913406	0.0640148
S172WTS007	Grischott:2016alpine	9.75619	46.3695	0.00184514	1866	mt	0.53463	0.632438	0.581487	0.581487	0.607692	TRUE	0.270937	0.456892	0.251763
S105WTS003	Kai:2015qilian	100.429	38.359	0.0231208	835	ss	0.5332	0.43158	0.558294	0.558294	0.638139	FALSE	0.201549	0.399386	0.234025
S069WTS032	Norton:2011alps	12.0255	47.3992	0.0102036	1533	mt	0.39194	0.61999	0.404148	0.404148	0.446835	FALSE	0.165793	0.13513	0.142194
S193WTS001	Wang:2017wenchuan	104.037	31.6157	0.0251056	1904	sm	0.62545	1.28163	0.506226	0.506226	0.682821	FALSE	0.304147	0.456319	0.452318
S260WTS022	He:2020weihe	108.047	34.0219	0.00749306	983	mt	0.48264	0.15817	0.531934	0.531934	0.63181	FALSE	0.14753	0.294766	0.151655
S165WTS008	Cyr:2014distinguishing	11.7643	44.0321	0.0211354	1077	sc	0.26678	0.58217	0.318543	0.318543	0.389253	TRUE	0.0672816	0.117139	0.0619862
S264WTS011	Kim:2016korean	129.449	35.8988	0.00290556	1316	vb	0.17013	0.09255	0.226127	0.226127	0.326699	FALSE	0.0262302	0.0917037	0.0344652
S182WTS031	Schmidt:2016yunnan	100.921	23.8257	0.0267187	1356	ss	0.34329	0.09281	0.369113	0.369113	0.458216	FALSE	0.0912943	0.12591	0.0833501
S225WTS001	Stolle:2018medieval	83.8911	28.3928	0.00956311	3833	mt	0.57531	0.622775	0.567837	0.567837	0.640948	TRUE	0.333863	0.255354	0.391411
S182WTS019	Schmidt:2016yunnan	100.776	24.2054	0.0265951	1403	ss	0.34358	0.13369	0.383929	0.383929	0.496542	FALSE	0.0954496	0.164776	0.0943426
S218WTS011	Matmon:2018namibia	14.6146	-21.2318	0.006875	113	pa	0.18161	0.00396	0.150533	0.150533	0.217715	FALSE	0.0631943	0.0462525	0.0585191
S038WTS029	Bierman:2007namibian	17.1273	-22.3073	0.026961	419	mt	0.1297	0.00826	0.146958	0.146958	0.194919	FALSE	0.0238782	0.0433233	0.0277375
S083WTS007	VandenBerg:2012entlebuch	8.10157	46.9415	0.00739861	1888	sm	0.3216	0.33684	0.335746	0.335746	0.371902	FALSE	0.0991167	0.123043	0.077711
S146WTS002	Burdis:2016nelson	172.665	-41.3061	0.0218854	2062	sc	0.43509	0.18569	0.456634	0.456634	0.527954	FALSE	0.134906	0.137181	0.127993
S082WTS039	Bookhagen:2012andes	-65.8237	-26.7118	0.0259937	1342	mt	0.23187	0.06196	0.248678	0.248678	0.293519	FALSE	0.13373	0.0487661	0.139251
S061WTS003	Insel:2010bolivian	-67.0239	-15.5022	0.0279781	2802	sm	0.25486	0.133642	0.274625	0.274625	0.347497	TRUE	0.0661289	0.109392	0.0570102
S129WTS003	Nobile:2016ambato	-66.0203	-27.9093	0.0254757	845	mt	0.22402	0.03992	0.279513	0.279513	0.379889	FALSE	0.096192	0.105679	0.0934693
S265WTS002	Kim:2020taebaek	128.329	38.1191	0.00575486	1898	pa	0.36714	0.08342	0.433646	0.433646	0.500965	FALSE	0.11969	0.23818	0.108634
S183WTS011	Kim:2017seti	83.9987	28.4656	0.0252812	3825	mt	0.71868	0.587489	0.495068	0.495068	0.729351	TRUE	0.451757	0.254914	0.76375
S265WTS012	Kim:2020taebaek	128.513	38.0031	0.0225618	2023	mt	0.35618	0.07877	0.428206	0.428206	0.530823	FALSE	0.109617	0.192107	0.103178
S104WTS013	Scherler:2013garhwal	77.9904	31.0763	0.00623889	1483	sm	0.6008	0.47415	0.637648	0.637648	0.684359	FALSE	0.246753	0.472817	0.287259
S164WTS039	Mandal:2015indian	75.0119	13.48	0.0277778	6427	mt	0.13462	0.02025	0.158704	0.158704	0.187352	FALSE	0.0452926	0.068232	0.0450621
S100WTS010	Dietsch:2014ladakh	77.7325	34.0113	5.68365e-05	385	nd	0.4843	0.00046	0.479814	0.479814	0.628784	FALSE	0.138928	0.0518364	0.0865741
S151WTS032	Derrieux:2014taiwan	120.998	23.0905	0.0261625	3452	sm	0.50904	3.1046	0.527469	0.527469	0.587665	FALSE	0.231783	0.272716	0.303743
S182WTS013	Schmidt:2016yunnan	99.4085	27.1391	0.00597986	1190	va	0.28659	0.01564	0.314758	0.314758	0.400625	FALSE	0.0979153	0.101889	0.10507
S135WTS011	Struth:2016colombia	-73.4977	5.3268	0.0282562	1316	sm	0.21927	0.01486	0.23476	0.23476	0.282653	FALSE	0.0965024	0.0639447	0.077689
S157WTS001	Tranel:2015teton	-110.818	43.7606	0.00482986	1536	pa	0.571	0.14229	0.543934	0.543934	0.628525	FALSE	0.183722	0.693575	0.200426
S001WTS003	Granger:1996averaged	-120.061	40.089	3.81737e-05	300	pa	0.2233	0.0757407	0.236381	0.236381	0.291547	TRUE	0.0555702	0.0185524	0.0277053
S229WTS012	Kober:2019steep	8.25247	46.5811	0.019491	2360	pa	0.55247	0.993346	0.554418	0.554418	0.601061	TRUE	0.269879	0.755066	0.321735
S260WTS016	He:2020weihe	108.949	33.9319	0.0137688	1156	mt	0.49847	0.11073	0.554296	0.554296	0.667151	FALSE	0.155731	0.52458	0.181686
S069WTS008	Norton:2011alps	9.56862	46.0702	0.0111175	2172	mt	0.55539	0.42286	0.573325	0.573325	0.626927	FALSE	0.277804	0.225271	0.313288
S108WTS010	Portenga:2015bhutanese	90.269	27.3096	0.0142028	2917	mt	0.65742	0.8203	0.671719	0.671719	0.754798	FALSE	0.365411	0.500973	0.497642
S062WTS003	Meyer:2008rhenish	8.54255	51.426	0.00996042	1078	ss	0.09158	0.04849	0.102619	0.102619	0.111575	FALSE	0.0156653	0.0168729	0.0144574
S262WTS001	Bender:2018yukon	-141.089	64.3461	0.00690069	462	mt	0.20238	0.01874	0.234325	0.234325	0.236068	FALSE	0.0675242	0.406648	0.0881097
S207WTS021	Stutenbecker:2018rhone	8.3975	46.5585	0.0106167	2661	mt	0.44521	1.34866	0.474493	0.474493	0.516185	FALSE	0.223285	0.260048	0.247407
S063WTS006	Cyr:2010italy	11.6098	44.0711	0.0202886	1103	sc	0.30802	0.307567	0.345178	0.345178	0.425849	TRUE	0.0698146	0.138551	0.0656079
S069WTS002	Norton:2011alps	12.1268	46.86	0.010552	1178	mt	0.51849	0.31158	0.514128	0.514128	0.578165	FALSE	0.252543	0.305017	0.254274
S115WTS036	Adams:2016bhutan	91.0627	27.5571	0.0250028	2299	mt	0.57542	0.21241	0.599388	0.599388	0.661289	FALSE	0.309136	0.280347	0.382267
S146WTS007	Burdis:2016nelson	172.799	-41.6975	0.0114639	1487	su	0.23647	0.15346	0.267398	0.267398	0.321323	FALSE	0.0479058	0.0758965	0.0435831
S141WTS003	Munack:2016indus	78.0374	33.1676	0.0128094	543	sc	0.31382	0.01717	0.31842	0.31842	0.339347	FALSE	0.140647	0.0325593	0.0946013
S011WTS006	Bierman:2001background	-123.879	44.4793	0.0200936	2836	ss	0.2914	0.11829	0.32588	0.32588	0.392715	FALSE	0.0600891	0.120556	0.0644473
S078WTS001	Hippe:2012altiplano	-68.2162	-16.4772	0.0268066	1253	sm	0.07679	0.01241	0.100397	0.100397	0.0966854	FALSE	0.03374	0.0299969	0.0215961
S037WTS023	Wittmann:2007switzerland	8.53851	46.1435	0.0193407	2336	mt	0.49417	0.82156	0.510329	0.510329	0.548713	FALSE	0.181498	0.247644	0.188194
S101WTS013	Munack:2014outpaced	78.0777	33.7604	0.023109	539	nd	0.4969	0.02642	0.497618	0.497618	0.542159	FALSE	0.221444	0.131992	0.238524
S037WTS028	Wittmann:2007switzerland	7.32951	46.7083	0.0190053	1743	sc	0.31551	0.23134	0.32553	0.32553	0.361016	FALSE	0.107626	0.149804	0.0828929
S082WTS026	Bookhagen:2012andes	-66.1178	-25.8473	0.0249084	624	sm	0.267	0.12447	0.286527	0.286527	0.362915	FALSE	0.110553	0.0792758	0.103749
S149WTS035	Gonzalez:2016panamanian	-81.5278	8.38846	0.0272979	4741	va	0.21068	0.06264	0.226106	0.226106	0.293313	FALSE	0.0663531	0.0588433	0.0531016
S119WTS002	Glotzbach:2016kruger	31.2524	-25.1279	0.00134375	840	pa	0.05771	0.0054675	0.0630869	0.0630869	0.0698213	TRUE	0.0114829	0.00509744	0.00721346
S261WTS030	Riley:2020staircase	-112.366	37.3185	0.0219229	374	ss	0.13177	0.3187	0.14181	0.14181	0.175436	FALSE	0.0275405	0.046829	0.0252345
S108WTS003	Portenga:2015bhutanese	89.6937	28.1342	0.00994375	695	mt	0.5649	0.32525	0.561056	0.561056	0.614208	FALSE	0.271831	0.347861	0.289076
S260WTS020	He:2020weihe	108.349	33.9138	0.0228493	990	mt	0.55871	0.07804	0.612576	0.612576	0.710017	FALSE	0.19352	0.514142	0.238749
S025WTS026	Safran:2005bolivian	-68.1697	-16.1099	0.0107918	2756	sm	0.51794	0.50589	0.505099	0.505099	0.587053	FALSE	0.263165	0.32314	0.447044
S039WTS011	Sullivan:2007blue	-80.8718	36.5184	0.00902616	1240	mt	0.1577	0.0107929	0.177003	0.177003	0.202329	TRUE	0.0327893	0.0496232	0.0330084
S103WTS019	Godard:2014himalayan	85.1132	28.0221	0.00790208	2645	mt	0.49263	1.134	0.510617	0.510617	0.551037	FALSE	0.288343	0.158722	0.296822
S207WTS011	Stutenbecker:2018rhone	7.81767	46.4184	0.0189424	1994	mt	0.54124	1.47038	0.577383	0.577383	0.613571	FALSE	0.344752	0.424611	0.388161
S209WTS001	Rosenkranz:2018shillong	91.6966	25.6289	0.024609	5196	mt	0.1436	0.05344	0.19761	0.19761	0.263064	FALSE	0.0511108	0.067315	0.0568069
S260WTS005	He:2020weihe	109.869	34.4294	0.0055	924	mt	0.50978	0.08212	0.583156	0.583156	0.669705	FALSE	0.154489	0.554952	0.190678
S164WTS049	Mandal:2015indian	76.5478	11.4966	0.0267444	2035	pa	0.15246	0.01595	0.18216	0.18216	0.220643	FALSE	0.0562772	0.0485406	0.0973012
S265WTS001	Kim:2020taebaek	128.362	38.1921	0.0213361	1954	pa	0.33286	0.05839	0.406587	0.406587	0.49543	FALSE	0.0900734	0.193386	0.0877338
S224WTS009	Young:2018lucia	-121.681	36.2434	0.0121139	1039	pi	0.43406	0.57155	0.440157	0.440157	0.533668	FALSE	0.122677	0.179015	0.117994
S230WTS016	Grin:2018tajikistan	71.3032	39.4907	0.0209424	927	sm	0.50698	1.50998	0.562162	0.562162	0.662416	FALSE	0.287072	0.551175	0.359499
S078WTS019	Hippe:2012altiplano	-68.177	-17.1903	0.025921	923	ss	0.0904	0.01009	0.106209	0.106209	0.123452	FALSE	0.0234738	0.013505	0.015697
S148WTS011	Fuchs:2015pamir	72.6653	37.1993	0.00862083	414	mt	0.46878	0.86831	0.503915	0.503915	0.548773	FALSE	0.247181	0.354955	0.297321
S127WTS002	Kober:2015bolivian	-65.0708	-19.0813	0.0256285	664	sm	0.26456	0.03834	0.315025	0.315025	0.398703	FALSE	0.0806515	0.115895	0.0744496
S069WTS030	Norton:2011alps	12.4559	47.1202	0.0100343	1748	mt	0.50072	1.32499	0.507882	0.507882	0.548963	FALSE	0.2672	0.387006	0.2971
S069WTS026	Norton:2011alps	10.733	46.5204	0.0186323	1316	mt	0.49379	1.3493	0.501711	0.501711	0.546585	FALSE	0.279381	0.249967	0.336299
S022WTS009	Nichols:2005chagres	-79.3341	9.36807	0.014488	3272	pa	0.21331	0.09603	0.222637	0.222637	0.290037	FALSE	0.0394258	0.0697392	0.0391092
S014WTS009	Clapp:2002arid	-114.58	33.0741	9.38027e-05	93	pa	0.10683	0.021615	0.124378	0.124378	0.235628	TRUE	0.00990874	0.0418026	0.017293
S165WTS042	Cyr:2014distinguishing	10.9295	44.0807	0.0193167	1200	sc	0.33873	0.21974	0.384797	0.384797	0.451119	FALSE	0.101801	0.133058	0.092745
S207WTS017	Stutenbecker:2018rhone	6.94871	46.0593	0.0184771	2173	mt	0.52454	1.27638	0.555956	0.555956	0.619232	FALSE	0.299611	0.560658	0.400796
S104WTS010	Scherler:2013garhwal	77.6012	30.7432	0.0120347	2276	sc	0.5023	0.33354	0.543062	0.543062	0.628832	FALSE	0.187769	0.231613	0.198768
S033WTS001	Salgado:2007maracuja	-43.6725	-20.3989	7.76612e-05	2112	mt	0.17974	0.00739	0.197991	0.197991	0.285152	FALSE	0.0137564	0.043396	0.0214385
S121WTS013	Dixon:2016alps	15.446	47.3875	0.00947847	1088	mt	0.4059	0.09453	0.433515	0.433515	0.49864	FALSE	0.109911	0.158722	0.100115
S055WTS024	DiBiase:2010gabriel	-117.987	34.3583	0.000111494	598	pa	0.18967	0.09621	0.178807	0.178807	0.248183	FALSE	0.0310229	0.0207567	0.0202243
S110WTS026	Ansberque:2015longriba	102.738	31.9795	0.0224243	1376	ss	0.4787	0.31025	0.507479	0.507479	0.57463	FALSE	0.189375	0.13596	0.190133
S056WTS015	Meyer:2010black	8.2349	48.1683	0.017585	1418	pa	0.27055	0.06897	0.265963	0.265963	0.292991	FALSE	0.0627906	0.0801409	0.060817
S102WTS008	Li:2014tibetan	94.4094	35.9833	0.0213206	258	ss	0.38414	0.03665	0.401324	0.401324	0.477906	FALSE	0.117893	0.177867	0.104123
S037WTS004	Wittmann:2007switzerland	8.37329	46.532	0.018107	2611	mt	0.45641	0.76215	0.459368	0.459368	0.502906	FALSE	0.220142	0.250793	0.236906
S071WTS029	Henck:2011three	97.7743	29.9099	0.0228127	929	sc	0.36291	0.02699	0.365934	0.365934	0.400381	FALSE	0.117767	0.0729805	0.0990453
S149WTS033	Gonzalez:2016panamanian	-79.45	9.43932	0.0100563	3430	vb	0.18553	0.201552	0.206355	0.206355	0.267637	TRUE	0.0343581	0.0662853	0.0367594
S149WTS005	Gonzalez:2016panamanian	-79.8832	8.87846	0.0258528	2295	va	0.08508	0.02318	0.0949457	0.0949457	0.126574	FALSE	0.0104685	0.0220255	0.015174
S072WTS002	Dortch:2011ladakh	77.433	34.3929	0.021583	766	pa	0.47	0.0605	0.4717	0.4717	0.531166	FALSE	0.193498	0.245799	0.182661
S106WTS003	LeRouxMallouf:2015bhutan	89.6141	27.1024	0.00592847	2869	mt	0.53029	0.17364	0.55467	0.55467	0.621675	FALSE	0.28598	0.312953	0.362724
S165WTS026	Cyr:2014distinguishing	16.7473	39.316	0.02005	1166	pa	0.24178	0.25803	0.284544	0.284544	0.34039	FALSE	0.0840397	0.0808878	0.0749289
S081WTS018	Roller:2012rwenzori	30.3049	0.78546	0.0258492	1106	ev	0.15125	0.03782	0.184597	0.184597	0.195698	FALSE	0.0688683	0.037046	0.0677423
S128WTS001	McPhillips:2013cordillera	-75.6625	-13.5053	0.0250139	466	pa	0.36099	0.05321	0.421024	0.421024	0.499623	FALSE	0.152189	0.2177	0.161049
S130WTS017	Schildgen:2016argentina	-65.3368	-23.5986	0.00985972	1121	ss	0.29042	0.0360225	0.313387	0.313387	0.361118	TRUE	0.174979	0.0556383	0.181183
S135WTS018	Struth:2016colombia	-73.6326	5.53009	0.0255236	1315	sm	0.19444	0.00699	0.206585	0.206585	0.24727	FALSE	0.0788118	0.041383	0.0559692
S181WTS001	Rossi:2017baja	-115.311	30.8559	0.00765764	258	pa	0.43063	0.09066	0.503849	0.503849	0.600228	FALSE	0.159609	0.282452	0.157513
S261WTS035	Riley:2020staircase	-112.164	37.3705	0.0203583	341	ss	0.14674	0.14246	0.159113	0.159113	0.189327	TRUE	0.0360859	0.105843	0.0351995
S121WTS006	Dixon:2016alps	14.6503	47.3382	0.00690347	1729	mt	0.45707	0.09766	0.460726	0.460726	0.511394	FALSE	0.170974	0.131254	0.152807
S104WTS019	Scherler:2013garhwal	78.039	31.3354	0.0218437	2012	mt	0.5498	0.99737	0.544191	0.544191	0.593384	FALSE	0.30438	0.355949	0.361736
S268WTS001	Adams:2020climate	90.2612	26.9438	0.0124181	3821	mt	0.46342	0.26388	0.486057	0.486057	0.559719	FALSE	0.176148	0.20074	0.170895
S182WTS034	Schmidt:2016yunnan	100.914	23.681	0.0234181	1677	ss	0.39368	0.10171	0.419035	0.419035	0.506298	FALSE	0.115204	0.137919	0.104199
S200WTS007	Cook:2018gongga	101.835	29.9749	0.0221347	1507	pa	0.3992	0.11682	0.438348	0.438348	0.486442	FALSE	0.194392	0.157492	0.192424
S105WTS005	Kai:2015qilian	100.587	38.3017	0.0109194	814	ss	0.5463	0.28427	0.576124	0.576124	0.664377	FALSE	0.195271	0.367291	0.213253
S165WTS027	Cyr:2014distinguishing	16.7519	39.4255	0.0107111	1041	mt	0.26766	0.18946	0.314035	0.314035	0.378478	FALSE	0.086418	0.09057	0.0755054
S264WTS002	Kim:2016korean	128.623	37.934	0.019966	1950	mt	0.27685	0.10753	0.340483	0.340483	0.439739	FALSE	0.0767753	0.144794	0.0712218
S038WTS022	Bierman:2007namibian	16.4696	-21.2018	0.0128923	394	pa	0.0593	0.00747	0.061742	0.061742	0.0640082	FALSE	0.0135179	0.00949065	0.0109438
S058WTS010	Norton:2010rhone	8.17975	46.4643	5.625e-05	2448	mt	0.41077	0.15318	0.437563	0.437563	0.45734	FALSE	0.139967	0.0137579	0.0908281
S023WTS031	Bierman:2005fpuerco	-107.648	35.4964	0.0205839	294	ss	0.07024	0.03449	0.0826343	0.0826343	0.0924947	FALSE	0.0180521	0.0187218	0.0173122
S264WTS009	Kim:2016korean	129.299	36.5845	0.020266	1220	pa	0.23191	0.06162	0.296156	0.296156	0.399579	FALSE	0.0543595	0.140052	0.0566212
S099WTS010	Kirby:2013kunlun	101.323	33.8791	0.0208716	1057	su	0.3153	0.06206	0.32448	0.32448	0.367467	FALSE	0.078772	0.0738537	0.0602565
S105WTS002	Kai:2015qilian	100.313	38.4395	0.0151556	783	ss	0.5091	0.29143	0.540723	0.540723	0.628117	FALSE	0.182575	0.245092	0.191839
S038WTS033	Bierman:2007namibian	17.4731	-21.7869	0.0233426	354	mt	0.0266	0.00547	0.0372398	0.0372398	0.0326692	FALSE	0.0046495	0.00581937	0.00792136
S115WTS039	Adams:2016bhutan	91.4107	27.5815	0.00860278	2434	mt	0.47391	0.1553	0.496378	0.496378	0.544543	FALSE	0.246137	0.123215	0.24262
S011WTS001	Bierman:2001background	-123.866	44.4842	0.0177936	2868	ss	0.2984	0.10866	0.334743	0.334743	0.401752	TRUE	0.0622544	0.124317	0.0657238
S164WTS002	Mandal:2015indian	76.5964	10.9144	0.00145625	2528	mt	0.4277	0.05906	0.480331	0.480331	0.544253	FALSE	0.173145	0.270671	0.172511
S220WTS017	Balco:2013pacific	-123.822	45.0096	0.0175306	2851	ss	0.21694	0.09764	0.231138	0.231138	0.272916	FALSE	0.057035	0.062752	0.0467158
S069WTS018	Norton:2011alps	9.64266	46.2426	0.0169309	1829	pa	0.60803	0.32493	0.554017	0.554017	0.64366	FALSE	0.384336	0.553379	0.415338
S279WTS005	Heimsath:2020equilibrium	31.0811	-23.1194	0.0227833	571	mt	0.0176	0.00362	0.0219361	0.0219361	0.0176072	FALSE	0.0033601	0.00188563	0.00454613
S101WTS021	Munack:2014outpaced	77.0054	34.4086	0.0204301	527	pa	0.4646	0.03397	0.476399	0.476399	0.537101	FALSE	0.206026	0.25695	0.227776
S100WTS001	Dietsch:2014ladakh	77.7801	33.9714	0.000139668	415	su	0.4933	0.00094	0.492455	0.492455	0.622441	FALSE	0.113518	0.114715	0.0976313
S265WTS013	Kim:2020taebaek	128.818	37.6786	0.0195576	1906	pa	0.26188	0.04082	0.311791	0.311791	0.401526	FALSE	0.0807094	0.111175	0.0681873
S182WTS044	Schmidt:2016yunnan	100.516	21.851	0.0123868	1805	pa	0.19786	0.04852	0.226081	0.226081	0.313471	FALSE	0.0534982	0.0701944	0.0456188
S261WTS013	Riley:2020staircase	-112.455	37.3998	0.0195188	453	ss	0.16252	0.37928	0.171235	0.171235	0.206334	FALSE	0.0344363	0.058114	0.0284308
S108WTS046	Portenga:2015bhutanese	89.7827	27.5234	0.0103618	1320	mt	0.42486	0.0846225	0.450564	0.450564	0.516578	TRUE	0.189937	0.191718	0.189651
S260WTS011	He:2020weihe	109.665	34.1632	0.0203222	851	mt	0.36329	0.06102	0.410634	0.410634	0.552493	FALSE	0.0911782	0.227259	0.0938735
S108WTS034	Portenga:2015bhutanese	89.9334	28.0808	0.0210438	1045	mt	0.52279	1.75496	0.518926	0.518926	0.573463	FALSE	0.264402	0.455618	0.337537
S151WTS022	Derrieux:2014taiwan	121.395	24.1698	0.0222361	3196	mt	0.55465	0.79172	0.554818	0.554818	0.693663	FALSE	0.281168	0.407225	0.403791
S179WTS007	DeLong:2017andreas	-123.333	38.757	0.0107687	1389	ss	0.25146	0.13878	0.298211	0.298211	0.357437	FALSE	0.0538324	0.0851682	0.052359
S151WTS030	Derrieux:2014taiwan	121.004	23.2084	0.0223903	3689	sm	0.5416	4.44871	0.552246	0.552246	0.624641	TRUE	0.25235	0.367188	0.334422
S104WTS005	Scherler:2013garhwal	78.0847	30.8782	0.0198083	1715	sm	0.4111	0.10739	0.431488	0.431488	0.486439	FALSE	0.138594	0.163793	0.125484
S035WTS010	Vanacker:2007vegetation	-78.9277	-2.99878	0.022461	1066	py	0.22043	0.0347593	0.249749	0.249749	0.31536	TRUE	0.0531186	0.0652459	0.0443077
S183WTS002	Kim:2017seti	84.0075	28.481	0.0213924	3845	mt	0.74523	0.550562	0.479398	0.479398	0.746169	TRUE	0.47675	0.228378	0.819481
S022WTS015	Nichols:2005chagres	-79.3404	9.3397	0.0221798	3267	pa	0.23125	0.11424	0.235298	0.235298	0.302756	FALSE	0.0466004	0.069937	0.0426817
S060WTS019	Palumbo:2010control	100.492	39.125	6.31361e-05	180	sm	0.24537	0.39307	0.253807	0.253807	0.365699	FALSE	0.0472856	0.0312046	0.0275468
S082WTS002	Bookhagen:2012andes	-66.0315	-27.272	0.0187477	1511	mt	0.46782	0.7063	0.484591	0.484591	0.557017	FALSE	0.284251	0.139442	0.366031
S081WTS012	Roller:2012rwenzori	29.9944	0.357638	0.0210855	3758	mt	0.41953	0.0657	0.427708	0.427708	0.500496	FALSE	0.212559	0.27915	0.267775
S023WTS020	Bierman:2005fpuerco	-107.061	36.0141	0.0170056	356	ss	0.05777	0.13012	0.0649308	0.0649308	0.0781879	FALSE	0.00986783	0.0114797	0.0106445
S110WTS033	Ansberque:2015longriba	103.27	31.8891	0.00183611	1244	ss	0.6362	0.23928	0.672621	0.672621	0.756876	FALSE	0.325477	0.604173	0.406633
S108WTS014	Portenga:2015bhutanese	90.1991	27.1077	0.0216437	3250	mt	0.52069	1.04761	0.546117	0.546117	0.614241	FALSE	0.233463	0.257595	0.271151
S009WTS055	Schaller:2001european	3.33122	45.0738	0.0146082	891	mt	0.11003	0.04347	0.192027	0.192027	0.207958	FALSE	0.0542865	0.0341412	0.0403116
S037WTS016	Wittmann:2007switzerland	8.62167	46.4433	0.0141698	2577	mt	0.55124	0.87613	0.55685	0.55685	0.598548	FALSE	0.28492	0.485363	0.328844
S037WTS021	Wittmann:2007switzerland	8.52505	46.3933	0.0141479	2700	mt	0.65508	0.6987	0.617507	0.617507	0.677273	FALSE	0.368235	0.868637	0.512399
S181WTS018	Rossi:2017baja	-115.286	30.8963	0.00126389	236	pa	0.45764	0.0980025	0.506347	0.506347	0.597069	TRUE	0.158521	0.1186	0.135919
S121WTS001	Dixon:2016alps	15.0581	46.6998	0.0166674	1321	mt	0.26554	0.0681725	0.285988	0.285988	0.317438	TRUE	0.112137	0.0610622	0.0959449
S009WTS013	Schaller:2001european	13.3296	48.9986	0.0133364	1509	mt	0.15505	0.02333	0.161616	0.161616	0.18205	FALSE	0.0507033	0.0210738	0.0293416
S164WTS003	Mandal:2015indian	76.5879	10.9549	0.00351806	2449	mt	0.41317	0.07206	0.44802	0.44802	0.505414	FALSE	0.159906	0.289525	0.163621
S265WTS005	Kim:2020taebaek	128.427	37.9587	0.019141	1987	mt	0.30693	0.06283	0.376391	0.376391	0.470461	FALSE	0.0811126	0.164343	0.0775708
S205WTS020	Fame:2018paraglacial	-4.98924	56.7765	0.0111215	3209	ss	0.40084	0.23689	0.422179	0.422179	0.449697	FALSE	0.161478	0.152924	0.117614
S138WTS004	Molliex:2016mediterranean	9.0347	42.4423	0.0178653	987	va	0.44857	0.04322	0.497144	0.497144	0.559031	FALSE	0.188392	0.30075	0.195659
S081WTS001	Roller:2012rwenzori	30.2574	0.670612	0.0240559	1311	mt	0.11871	0.01557	0.130584	0.130584	0.159037	FALSE	0.0302327	0.0271782	0.0303794
S226WTS003	Tofelde:2018hillslope	-65.7591	-24.5063	0.0121194	1354	sm	0.21756	0.0845315	0.225124	0.225124	0.268459	TRUE	0.116344	0.0444623	0.07844
S230WTS015	Grin:2018tajikistan	71.1304	39.4376	0.018575	971	sm	0.47537	1.16092	0.524413	0.524413	0.637953	FALSE	0.27514	0.501582	0.332225
S138WTS003	Molliex:2016mediterranean	9.02972	42.5094	0.0147049	915	va	0.37053	0.03695	0.402272	0.402272	0.453829	FALSE	0.132601	0.114095	0.119115
S164WTS037	Mandal:2015indian	75.3836	13.0867	0.0234215	4721	mt	0.21005	0.03519	0.215095	0.215095	0.266823	FALSE	0.0751896	0.104351	0.0666569
S135WTS007	Struth:2016colombia	-74.0261	4.40083	0.0239243	1789	sm	0.25394	0.07606	0.264337	0.264337	0.299403	FALSE	0.149444	0.0748209	0.133013
S023WTS035	Bierman:2005fpuerco	-107.678	35.3141	0.0195747	305	ss	0.10363	0.02694	0.113697	0.113697	0.12763	FALSE	0.0383892	0.019678	0.0263504
S164WTS008	Mandal:2015indian	76.4517	11.3046	0.0234062	3124	pa	0.34284	0.05137	0.435587	0.435587	0.457608	FALSE	0.23113	0.282831	0.264369
S038WTS037	Bierman:2007namibian	16.0956	-23.7337	7.0957e-05	307	pa	0.3725	0.00738	0.389947	0.389947	0.467434	FALSE	0.0833459	0.0877011	0.0668552
S067WTS005	Placzek:2010atacama	-68.0647	-23.9937	0.0215535	192	py	0.1004	0.00189	0.104633	0.104633	0.113201	FALSE	0.0669852	0.00909633	0.0432447
S076WTS007	Andermann:2011nepal	85.2144	28.296	0.0207004	3092	mt	0.64129	3.43447	0.586529	0.586529	0.67714	FALSE	0.42906	0.418795	0.809445
S104WTS003	Scherler:2013garhwal	78.158	30.7199	0.00834306	2128	sc	0.4499	0.170598	0.476574	0.476574	0.549101	TRUE	0.183444	0.171634	0.177805
S261WTS049	Riley:2020staircase	-112.32	37.5006	0.0186417	536	sc	0.20935	0.05366	0.21554	0.21554	0.248409	FALSE	0.0390762	0.0463832	0.0323673
S069WTS016	Norton:2011alps	12.1859	47.1338	0.0131187	1730	pa	0.53768	0.56281	0.538112	0.538112	0.585537	FALSE	0.3025	0.314286	0.345665
S015WTS011	Matmon:2003smoky	-83.2351	35.6	0.0190565	1652	mt	0.32458	0.02381	0.357426	0.357426	0.412353	FALSE	0.094579	0.0996346	0.0853533
S130WTS018	Schildgen:2016argentina	-65.3253	-23.5748	0.00608472	1084	ss	0.26327	0.01746	0.284308	0.284308	0.32899	TRUE	0.158584	0.0506119	0.163072
S065WTS002	Guralnik:2010pavements	34.8262	30.5991	0.0201708	94	sc	0.0974	0.02344	0.103399	0.103399	0.128639	FALSE	0.0168679	0.0289613	0.0160886
S260WTS003	He:2020weihe	110.02	34.4685	0.002925	862	pa	0.53443	0.08721	0.567205	0.567205	0.672788	FALSE	0.141767	0.861883	0.179049
S023WTS013	Bierman:2005fpuerco	-108.318	35.2908	0.0188833	437	ss	0.08023	0.00619	0.0923259	0.0923259	0.0988614	FALSE	0.0197739	0.0129793	0.0148469
S102WTS013	Li:2014tibetan	92.8358	34.6285	0.0190132	536	ss	0.15531	0.01904	0.163596	0.163596	0.188547	FALSE	0.0308082	0.0329557	0.0240933
S116WTS006	Bierman:2014view	24.1119	-33.9044	0.0191701	929	ss	0.22962	0.00294	0.257361	0.257361	0.300958	FALSE	0.050851	0.0632993	0.0407049
S183WTS021	Kim:2017seti	83.8855	28.3803	0.0114812	3768	mt	0.54294	0.33524	0.566433	0.566433	0.636629	FALSE	0.332108	0.254841	0.390288
S069WTS024	Norton:2011alps	11.5937	46.9544	0.015745	1452	mt	0.53227	0.5549	0.543784	0.543784	0.588261	FALSE	0.23784	0.461388	0.257635
S139WTS012	Olivetti:2016massif	4.54302	45.2117	0.0132257	1110	mt	0.28131	0.03746	0.296982	0.296982	0.320752	FALSE	0.082088	0.04976	0.0623081
S127WTS001	Kober:2015bolivian	-65.0018	-19.0123	0.0217479	682	sm	0.29237	0.08482	0.343565	0.343565	0.442873	FALSE	0.0888504	0.130743	0.0765382
S139WTS002	Olivetti:2016massif	4.68616	45.3796	0.00298264	919	pa	0.14486	0.02925	0.156782	0.156782	0.17013	FALSE	0.0534308	0.019309	0.0307294
S179WTS004	DeLong:2017andreas	-123.439	38.9027	0.0178389	1458	ss	0.28632	0.19552	0.340497	0.340497	0.403178	FALSE	0.0602472	0.0987984	0.0583331
S276WTS004	Vanacker:2020tropical	-78.9059	-1.86691	0.0228563	2379	sm	0.45499	5.37187	0.479349	0.479349	0.547781	FALSE	0.226139	0.191521	0.283152
S018WTS007	Morel:2003wutach	8.15886	47.9206	0.0152919	1649	mt	0.19051	0.04402	0.199765	0.199765	0.213907	FALSE	0.0376743	0.0379688	0.031508
S101WTS032	Munack:2014outpaced	77.9697	33.5317	0.018976	505	pb	0.3943	0.02394	0.407547	0.407547	0.452248	FALSE	0.162638	0.101956	0.192639
S093WTS008	Regalla:2013tohoku	140.753	37.6551	0.0180029	1708	pa	0.17231	0.0583	0.193293	0.193293	0.2347	FALSE	0.0367922	0.0631163	0.0404252
S183WTS009	Kim:2017seti	84.0087	28.4875	0.0199215	3856	mt	0.75812	0.87698	0.473169	0.473169	0.755794	TRUE	0.485616	0.228917	0.853804
S104WTS002	Scherler:2013garhwal	77.9419	30.7126	0.0159799	2216	sc	0.4816	0.13537	0.521179	0.521179	0.60427	FALSE	0.176611	0.261507	0.184216
S009WTS069	Schaller:2001european	3.29492	46.0131	0.0157222	838	sm	0.0369	0.01732	0.040294	0.040294	0.0398857	FALSE	0.00644111	0.00424655	0.00651312
S097WTS014	Buechi:2014nunatak	8.94339	47.3815	0.000113194	1744	sm	0.2642	0.20882	0.310695	0.310695	0.382087	FALSE	0.028836	0.0472722	0.0251131
S149WTS023	Gonzalez:2016panamanian	-79.2833	9.20507	0.022316	3416	pa	0.16894	0.24105	0.178438	0.178438	0.226455	FALSE	0.0465566	0.0405153	0.0338145
S111WTS018	Olen:2015arun	87.1064	27.6417	0.0199514	3870	mt	0.58945	1.37385	0.571152	0.571152	0.644385	FALSE	0.360278	0.407004	0.573375
S101WTS017	Munack:2014outpaced	78.5408	33.0869	0.0188646	359	su	0.3335	0.02597	0.338034	0.338034	0.372854	FALSE	0.149844	0.0683639	0.119582
S086WTS008	Godard:2012marsyandi	84.5109	28.3897	0.0198023	3839	mt	0.6167	3.17188	0.606662	0.606662	0.67202	FALSE	0.470319	0.370725	0.742659
S075WTS001	Moon:2011washington	-121.271	47.6088	0.0151022	3111	pa	0.50016	0.47289	0.511992	0.511992	0.548804	FALSE	0.224496	0.360738	0.259032
S103WTS006	Godard:2014himalayan	84.7581	27.7628	0.00424444	2888	mt	0.49248	0.44044	0.506836	0.506836	0.599755	FALSE	0.142596	0.260788	0.139206
S159WTS016	Acosta:201vegetation	36.8995	1.81219	0.0223083	605	mt	0.05264	0.00394	0.0601855	0.0601855	0.0557578	FALSE	0.0138452	0.00890424	0.0103937
S224WTS006	Young:2018lucia	-121.789	36.3275	0.0104889	1045	pa	0.40706	0.19902	0.404858	0.404858	0.488704	FALSE	0.111925	0.14874	0.102481
S206WTS004	Val:2018andes	-69.0392	-31.1951	0.0156819	209	ss	0.31343	0.0745	0.333982	0.333982	0.420076	FALSE	0.135565	0.110162	0.122448
S230WTS014	Grin:2018tajikistan	70.5546	39.3092	0.0118146	984	pa	0.45489	0.57499	0.500203	0.500203	0.555919	FALSE	0.250389	0.283809	0.292688
S200WTS021	Cook:2018gongga	101.913	29.6801	0.0193139	2559	pa	0.47966	7.96577	0.498371	0.498371	0.752273	FALSE	0.493521	0.272069	0.518638
S196WTS006	Fellin:2017taiwan	120.84	22.5241	0.012016	2930	ss	0.5148	4.44098	0.527788	0.527788	0.613705	FALSE	0.198861	0.263305	0.220567
S182WTS014	Schmidt:2016yunnan	100.738	24.1816	0.00802569	1418	ss	0.40623	0.10495	0.45239	0.45239	0.573771	FALSE	0.0982623	0.197385	0.0965481
S138WTS006	Molliex:2016mediterranean	8.92127	42.2938	0.00643056	1254	pa	0.3156	0.05535	0.335141	0.335141	0.378435	FALSE	0.114989	0.0929979	0.0841291
S128WTS007	McPhillips:2013cordillera	-75.6541	-13.4926	0.0215389	494	sc	0.35738	0.04933	0.416562	0.416562	0.491422	FALSE	0.148609	0.222585	0.155766
S149WTS027	Gonzalez:2016panamanian	-79.4624	9.42724	0.012766	3387	vb	0.18501	0.27367	0.204369	0.204369	0.26579	FALSE	0.0344011	0.06542	0.0361582
S108WTS026	Portenga:2015bhutanese	89.9088	27.8391	0.0195757	1463	mt	0.46137	0.55556	0.461463	0.461463	0.553624	FALSE	0.226454	0.365203	0.441572
S092WTS019	Barreto:2013minas	-43.5509	-19.4044	0.0208597	1907	ss	0.17885	0.00469	0.185432	0.185432	0.219547	FALSE	0.0599096	0.0409129	0.0543709
S164WTS036	Mandal:2015indian	75.4673	13.0069	0.0215104	4860	mt	0.19661	0.04168	0.220459	0.220459	0.263578	FALSE	0.0632755	0.0529001	0.0524132
S121WTS018	Dixon:2016alps	15.3777	46.5176	0.00878403	1322	mt	0.26467	0.08817	0.285405	0.285405	0.330241	FALSE	0.0973472	0.0640974	0.0795165
S149WTS014	Gonzalez:2016panamanian	-81.8264	8.43635	0.0215521	5136	va	0.30642	0.40887	0.329237	0.329237	0.40541	FALSE	0.10221	0.138319	0.0882566
S025WTS015	Safran:2005bolivian	-68.2675	-15.4857	0.0209813	2053	sm	0.46742	0.1644	0.512393	0.512393	0.599633	FALSE	0.171448	0.248239	0.196622
S110WTS005	Ansberque:2015longriba	102.41	32.6658	0.00731597	1089	sm	0.2233	0.03447	0.233877	0.233877	0.271445	FALSE	0.0358551	0.0526506	0.0325771
S127WTS032	Kober:2015bolivian	-64.6884	-19.2047	0.0205486	698	sm	0.25313	0.02065	0.306082	0.306082	0.398378	FALSE	0.0607306	0.112448	0.0578128
S073WTS005	Siame:2011taiwan	121.407	24.4646	0.0197732	3679	ss	0.52518	1.61397	0.554354	0.554354	0.627244	FALSE	0.216831	0.294576	0.243908
S108WTS008	Portenga:2015bhutanese	90.1031	27.3936	0.0113222	2547	mt	0.42556	0.24313	0.43211	0.43211	0.515072	FALSE	0.224922	0.245722	0.360102
S135WTS009	Struth:2016colombia	-73.6288	5.19379	0.021616	1263	sm	0.16159	0.01064	0.174213	0.174213	0.214235	FALSE	0.0453626	0.0379459	0.0322509
S078WTS008	Hippe:2012altiplano	-68.0721	-16.9584	0.020737	712	sm	0.08607	0.00485	0.0921174	0.0921174	0.124866	FALSE	0.0148165	0.0154226	0.0133677
S072WTS012	Dortch:2011ladakh	77.8452	34.0141	0.0179668	500	nd	0.4301	0.0193	0.430585	0.430585	0.478274	FALSE	0.173618	0.0931341	0.154442
S121WTS022	Dixon:2016alps	14.8209	47.3334	0.00449583	1472	mt	0.38156	0.07616	0.394225	0.394225	0.432305	FALSE	0.129815	0.0763194	0.106368
S127WTS033	Kober:2015bolivian	-64.7976	-19.1496	0.0204312	645	sm	0.26419	0.0148	0.306204	0.306204	0.387508	FALSE	0.0712501	0.0946081	0.0618642
S159WTS018	Acosta:201vegetation	36.8378	2.00892	0.0137993	661	mt	0.16732	0.0303	0.182387	0.182387	0.203526	FALSE	0.0650353	0.0480654	0.0629796
S235WTS013	Collignon:2019zagros	53.865	29.0166	0.0189104	378	sm	0.1611	0.03789	0.195219	0.195219	0.235757	FALSE	0.0495172	0.0877925	0.0455761
S101WTS005	Munack:2014outpaced	76.8768	34.4761	0.0178183	516	pa	0.4765	0.06836	0.482853	0.482853	0.541967	FALSE	0.209282	0.226583	0.231187
S081WTS011	Roller:2012rwenzori	30.1054	0.441804	0.0216023	2186	mt	0.29172	0.03426	0.311272	0.311272	0.36941	FALSE	0.130511	0.0836928	0.131256
S014WTS005	Clapp:2002arid	-114.52	33.1598	0.0180464	105	va	0.099	0.0316001	0.116563	0.116563	0.179813	TRUE	0.0140238	0.0509916	0.0214024
S261WTS028	Riley:2020staircase	-112.412	37.2923	0.00579167	372	sm	0.0889	0.09523	0.0949097	0.0949097	0.116586	FALSE	0.0175894	0.0184731	0.0149858
S010WTS027	Kirchner:2001mountain	-115.252	45.7643	0.0149882	1234	pa	0.1865	0.03794	0.208896	0.208896	0.236982	FALSE	0.0460426	0.0456875	0.0376174
S121WTS028	Dixon:2016alps	15.4725	47.6103	0.00855069	1300	va	0.36039	0.14448	0.38075	0.38075	0.424258	FALSE	0.102937	0.104288	0.0848158
S264WTS003	Kim:2016korean	128.709	37.8216	0.0169132	1972	pa	0.26873	0.05436	0.320723	0.320723	0.41917	FALSE	0.0854966	0.129702	0.0756745
S038WTS020	Bierman:2007namibian	16.3723	-21.3574	0.0198457	367	pa	0.0652	0.0094	0.0672033	0.0672033	0.0723299	FALSE	0.01223	0.00989982	0.00949497
S078WTS015	Hippe:2012altiplano	-67.5651	-17.3122	0.0202501	758	sm	0.09188	0.00802	0.125525	0.125525	0.131051	FALSE	0.027586	0.0184428	0.0187218
S071WTS043	Henck:2011three	96.867	29.6948	0.0183982	1312	sm	0.44173	0.17914	0.444142	0.444142	0.499363	FALSE	0.120662	0.218822	0.109905
S111WTS014	Olen:2015arun	87.0042	27.3949	0.0187946	2666	sm	0.56058	0.16732	0.58329	0.58329	0.64527	FALSE	0.296329	0.263741	0.348065
S220WTS001	Balco:2013pacific	-123.488	40.3299	0.0159424	2107	ss	0.27256	0.80835	0.277092	0.277092	0.326863	FALSE	0.0864814	0.0646141	0.0642905
S063WTS003	Cyr:2010italy	11.5554	44.1459	0.0149178	1035	sc	0.30023	0.42	0.341326	0.341326	0.429433	TRUE	0.0619231	0.146874	0.0626022
S253WTS008	Chen:2020morakot	120.835	22.5228	0.0113472	2934	ss	0.5195	3.55894	0.532721	0.532721	0.619204	TRUE	0.201724	0.271929	0.225358
S265WTS009	Kim:2020taebaek	128.891	37.5136	0.016459	1947	sc	0.21028	0.05138	0.263338	0.263338	0.34838	FALSE	0.0463652	0.100306	0.0460619
S121WTS007	Dixon:2016alps	13.9073	47.3085	0.0140646	1685	mt	0.61049	0.17316	0.622255	0.622255	0.664572	FALSE	0.286463	0.572012	0.294187
S095WTS002	Hetzel:2013tibetan	99.1882	38.8596	0.0161487	986	pa	0.3811	0.28749	0.394308	0.394308	0.444818	FALSE	0.137667	0.104766	0.124596
S055WTS001	DiBiase:2010gabriel	-118.08	34.3312	0.0171236	586	pa	0.32225	0.11669	0.315076	0.315076	0.400055	FALSE	0.0886164	0.101351	0.0784243
S101WTS014	Munack:2014outpaced	77.6541	33.85	0.0172016	494	sm	0.4804	0.08379	0.510536	0.510536	0.593879	FALSE	0.182849	0.210355	0.186196
S127WTS028	Kober:2015bolivian	-64.3641	-19.0962	0.0193375	727	sm	0.24486	0.01644	0.284893	0.284893	0.355314	FALSE	0.0692023	0.0847993	0.0605888
S253WTS005	Chen:2020morakot	120.85	22.5965	0.0168785	2806	ss	0.49516	3.06351	0.511849	0.511849	0.590691	TRUE	0.201767	0.299502	0.217464
S200WTS005	Cook:2018gongga	101.864	29.8257	0.0177292	1996	pa	0.42384	0.97336	0.470849	0.470849	0.542248	TRUE	0.205961	0.319533	0.226923
S143WTS006	Wittmann:2016po	8.45559	46.0313	0.0141875	2385	mt	0.54708	0.27371	0.620329	0.620329	0.69337	FALSE	0.218457	0.475942	0.247686
S057WTS010	Delunel:2010pelvoux	6.07946	44.8819	0.0144314	1890	mt	0.68549	0.3213	0.63922	0.63922	0.732507	FALSE	0.346782	0.62253	0.376889
S159WTS003	Acosta:201vegetation	35.8933	-1.77837	0.0203201	935	mt	0.15591	0.00762	0.17122	0.17122	0.192242	FALSE	0.0691488	0.0429498	0.152987
S205WTS018	Fame:2018paraglacial	-4.86794	56.8068	0.00104375	3126	mt	0.37392	0.17958	0.38669	0.38669	0.413695	FALSE	0.121579	0.034246	0.0677043
S101WTS003	Munack:2014outpaced	78.4043	33.4468	0.0167446	459	nd	0.4568	0.02645	0.455595	0.455595	0.497397	FALSE	0.194443	0.113719	0.204186
S078WTS002	Hippe:2012altiplano	-68.1973	-16.4375	0.0191415	1399	sm	0.10117	0.00277	0.168061	0.168061	0.207613	FALSE	0.0549868	0.0610296	0.0373239
S265WTS014	Kim:2020taebaek	128.975	37.5879	0.0143986	1677	sc	0.29805	0.05921	0.368839	0.368839	0.479805	FALSE	0.0678076	0.176387	0.0721861
S061WTS004	Insel:2010bolivian	-67.0884	-15.5534	0.0173139	2603	sm	0.24691	0.09021	0.257197	0.257197	0.304914	FALSE	0.080372	0.0599306	0.0557469
S264WTS004	Kim:2016korean	129.19	37.3013	0.015816	1523	pb	0.26776	0.06122	0.347805	0.347805	0.45251	FALSE	0.0770281	0.146513	0.0739352
S082WTS010	Bookhagen:2012andes	-65.7113	-24.5911	0.0158463	1164	sm	0.3196	0.07055	0.327497	0.327497	0.380277	FALSE	0.160682	0.0704952	0.150408
S207WTS020	Stutenbecker:2018rhone	8.12831	46.4847	0.00942361	2405	ig	0.45451	2.26637	0.490281	0.490281	0.534136	FALSE	0.287531	0.41042	0.336424
S135WTS008	Struth:2016colombia	-74.1558	4.38255	0.0195785	1655	ss	0.18106	0.0143	0.191688	0.191688	0.225742	FALSE	0.0823806	0.0327477	0.0522146
S025WTS007	Safran:2005bolivian	-68.5926	-15.5725	0.0166771	2017	sm	0.50313	0.20201	0.521527	0.521527	0.581357	FALSE	0.321347	0.284003	0.514837
S135WTS015	Struth:2016colombia	-73.8486	4.8528	0.0197167	1408	ss	0.17027	0.0034	0.165844	0.165844	0.209585	FALSE	0.0579493	0.0331487	0.036024
S207WTS016	Stutenbecker:2018rhone	7.3254	46.133	0.00802083	1584	su	0.42388	0.62492	0.454266	0.454266	0.497048	FALSE	0.268866	0.169685	0.300084
S110WTS024	Ansberque:2015longriba	103.424	32.2906	0.0167264	1272	ss	0.431	0.17985	0.453488	0.453488	0.506027	FALSE	0.140502	0.11591	0.124489
S069WTS035	Norton:2011alps	10.4587	46.0879	0.0134989	1769	pa	0.53985	0.57127	0.552313	0.552313	0.594538	FALSE	0.300601	0.342132	0.386864
S107WTS006	Morell:2015gap	78.2543	30.6822	0.0169495	1993	sc	0.4079	0.1557	0.434044	0.434044	0.505112	FALSE	0.154303	0.140034	0.139255
S073WTS004	Siame:2011taiwan	121.405	24.4557	0.017915	3666	ss	0.52577	0.89478	0.557781	0.557781	0.635491	FALSE	0.220085	0.28547	0.248629
S019WTS002	Perg:2003cruz	-122.249	37.2614	0.0156513	843	ss	0.2284	0.1814	0.261117	0.261117	0.309551	FALSE	0.0510012	0.0844878	0.0480088
S133WTS009	Gonzalez:2016background	-41.9658	-21.3806	0.0182431	1286	mt	0.22245	0.00998	0.232465	0.232465	0.285418	FALSE	0.0283225	0.080411	0.0362657
S139WTS021	Olivetti:2016massif	4.46762	45.0922	0.0137139	1193	mt	0.25096	0.05143	0.278479	0.278479	0.307998	FALSE	0.0658254	0.0596538	0.0534886
S111WTS019	Olen:2015arun	87.1294	27.6964	0.0171884	4442	mt	0.6482	1.44221	0.556473	0.556473	0.693029	FALSE	0.403195	0.388666	0.625534
S260WTS017	He:2020weihe	108.849	33.9126	0.016109	1229	mt	0.43363	0.07416	0.483772	0.483772	0.589526	FALSE	0.144439	0.366106	0.157133
S271WTS019	Brocard:2021guatemala	-90.6138	15.0709	0.0131951	1568	mt	0.29806	0.06266	0.318399	0.318399	0.389155	FALSE	0.105891	0.0987991	0.0920433
S026WTS015	Reuter:2005susquehanna	-76.1479	40.0535	0.0148562	1139	sc	0.0349	0.01104	0.040569	0.040569	0.0403912	FALSE	0.00457725	0.00512339	0.00749925
S260WTS007	He:2020weihe	109.729	34.2948	0.0112688	904	pa	0.4816	0.16674	0.546926	0.546926	0.678371	FALSE	0.129677	0.391065	0.144222
S086WTS023	Godard:2012marsyandi	84.4846	28.5149	0.0119852	3632	mt	0.69803	1.10417	0.306894	0.306894	0.730571	FALSE	0.319474	0.112611	0.207666
S015WTS035	Matmon:2003smoky	-83.8415	35.5831	0.0156596	1728	ss	0.21197	0.01387	0.235415	0.235415	0.285637	FALSE	0.0558431	0.0660304	0.0478971
S072WTS005	Dortch:2011ladakh	77.8808	34.208	0.0159017	560	pa	0.4781	0.04466	0.477788	0.477788	0.525402	FALSE	0.233344	0.100378	0.227206
S193WTS021	Wang:2017wenchuan	103.84	31.3622	0.0163326	1714	vi	0.69262	0.817054	0.335623	0.335623	0.690211	TRUE	0.259457	0.154834	0.358931
S179WTS005	DeLong:2017andreas	-123.423	38.84	0.0105993	1422	ss	0.28436	0.17341	0.339044	0.339044	0.416216	FALSE	0.0577003	0.106787	0.0585597
S115WTS002	Adams:2016bhutan	90.6712	27.3528	0.0120667	2623	mt	0.54577	0.4069	0.558742	0.558742	0.608153	FALSE	0.357772	0.128904	0.456359
S104WTS017	Scherler:2013garhwal	77.6428	31.1874	0.0116167	1624	mt	0.394	0.26886	0.416923	0.416923	0.47384	FALSE	0.151505	0.103327	0.126983
S015WTS031	Matmon:2003smoky	-83.5784	35.6295	0.0154966	1594	ss	0.25565	0.02412	0.312866	0.312866	0.367968	FALSE	0.0824763	0.0886759	0.066744
S051WTS001	Cox:2009madagascar	47.1861	-19.1492	0.017992	1819	vb	0.13958	0.01101	0.153384	0.153384	0.188461	FALSE	0.0355068	0.026494	0.0266542
S093WTS004	Regalla:2013tohoku	140.776	37.3356	0.0151064	1822	pa	0.15624	0.09147	0.177816	0.177816	0.214835	FALSE	0.0363538	0.0538535	0.0329396
S050WTS015	Ouimet:2009threshold	100.887	31.6587	0.016103	913	ss	0.2239	0.03146	0.241645	0.241645	0.275444	FALSE	0.0453649	0.0512223	0.0403587
S101WTS010	Munack:2014outpaced	78.2653	33.5627	0.0157534	512	pa	0.467	0.08604	0.461801	0.461801	0.507086	FALSE	0.200012	0.113021	0.235275
S200WTS003	Cook:2018gongga	102.076	29.3346	0.00297153	2340	pa	0.57328	0.68209	0.615669	0.615669	0.727778	FALSE	0.434879	0.283053	0.713902
S185WTS009	Salgado:2016relief	-44.7372	-22.8089	0.0174111	2041	mt	0.21541	0.00767	0.26083	0.26083	0.334909	FALSE	0.0571339	0.0808933	0.0656961
S196WTS008	Fellin:2017taiwan	120.89	22.6717	0.0125035	2930	mt	0.47085	2.86487	0.503352	0.503352	0.577178	TRUE	0.178504	0.253521	0.199716
S224WTS007	Young:2018lucia	-121.703	36.2478	0.0149708	1049	pi	0.42383	0.387968	0.426566	0.426566	0.514814	TRUE	0.120443	0.16484	0.113933
S144WTS002	Nakamura:2014abukuma	140.775	37.4281	0.0107535	1729	pa	0.15189	0.09182	0.175805	0.175805	0.218085	FALSE	0.0318243	0.0551392	0.0317468
S025WTS022	Safran:2005bolivian	-67.5276	-16.0995	0.0129985	2172	sm	0.43342	0.22563	0.476759	0.476759	0.593217	FALSE	0.145581	0.208258	0.180965
S137WTS008	Molliex:2016lion	4.53595	44.3056	0.0132222	980	sc	0.10518	0.04578	0.122061	0.122061	0.142439	FALSE	0.0251997	0.0440721	0.0247209
S164WTS025	Mandal:2015indian	75.4564	12.3198	0.0168528	5834	pa	0.28313	0.0292	0.316936	0.316936	0.377854	FALSE	0.0853269	0.0787745	0.0693906
S075WTS010	Moon:2011washington	-120.854	47.6869	0.0123743	2045	mt	0.47455	0.18122	0.477841	0.477841	0.52125	FALSE	0.189048	0.175866	0.197038
S092WTS024	Barreto:2013minas	-43.7372	-18.3176	0.0128218	1482	ss	0.11249	0.00223	0.118458	0.118458	0.146681	FALSE	0.0188205	0.0271924	0.0171654
S121WTS010	Dixon:2016alps	15.075	46.8659	0.00787778	1088	mt	0.25772	0.05533	0.27483	0.27483	0.312317	FALSE	0.100962	0.0548253	0.0727965
S015WTS039	Matmon:2003smoky	-83.1236	35.6278	0.0148854	1634	mt	0.2922	0.01846	0.318428	0.318428	0.382343	FALSE	0.0770963	0.0861994	0.0632153
S253WTS010	Chen:2020morakot	120.848	22.459	0.0113069	2851	ss	0.44461	2.28617	0.469915	0.469915	0.548253	TRUE	0.145245	0.203882	0.145397
S164WTS057	Mandal:2015indian	76.5131	11.1669	0.0179562	2852	pa	0.26591	0.02832	0.313285	0.313285	0.383844	FALSE	0.111208	0.124858	0.134485
S265WTS007	Kim:2020taebaek	128.594	37.7495	0.0106132	2198	pa	0.2752	0.08633	0.335908	0.335908	0.421794	FALSE	0.0733574	0.12839	0.0647267
S261WTS029	Riley:2020staircase	-112.348	37.3376	0.0145208	377	ss	0.14836	0.32467	0.157803	0.157803	0.19803	FALSE	0.0292866	0.0531076	0.0266343
S057WTS007	Delunel:2010pelvoux	6.43045	44.9029	0.0128929	1749	mt	0.65753	1.32289	0.593788	0.593788	0.704279	FALSE	0.336218	0.712023	0.378884
S099WTS003	Kirby:2013kunlun	100.802	34.7996	9.17563e-05	710	sm	0.31782	0.07422	0.346842	0.346842	0.445344	FALSE	0.0698891	0.180525	0.056469
S071WTS034	Henck:2011three	98.4202	29.7214	0.0155958	725	ss	0.41188	0.08609	0.426298	0.426298	0.494247	FALSE	0.176236	0.130222	0.171718
S151WTS020	Derrieux:2014taiwan	121.474	24.2673	0.0163278	3355	mt	0.54959	4.8669	0.575361	0.575361	0.655507	FALSE	0.247048	0.456329	0.321701
S143WTS005	Wittmann:2016po	8.58845	46.0799	0.0124111	2508	mt	0.52806	0.33777	0.571993	0.571993	0.627138	FALSE	0.208391	0.180834	0.211201
S060WTS013	Palumbo:2010control	100.03	39.0193	0.000326031	212	sm	0.16957	0.13014	0.171611	0.171611	0.251066	FALSE	0.0322185	0.0582746	0.0252591
S207WTS018	Stutenbecker:2018rhone	7.70503	46.2047	0.0123667	1328	mt	0.46204	0.80346	0.493758	0.493758	0.535508	FALSE	0.326552	0.219102	0.427397
S037WTS022	Wittmann:2007switzerland	8.48628	46.1379	0.0123484	2427	mt	0.46531	0.99938	0.474836	0.474836	0.516197	FALSE	0.166812	0.144213	0.149233
S104WTS009	Scherler:2013garhwal	78.4227	30.9854	0.0151917	2224	mt	0.578	5.03921	0.611772	0.611772	0.652992	FALSE	0.321059	0.610477	0.403031
S055WTS011	DiBiase:2010gabriel	-117.731	34.3173	0.0145993	653	mt	0.54498	0.97261	0.538474	0.538474	0.622405	FALSE	0.206099	0.197268	0.215882
S037WTS010	Wittmann:2007switzerland	7.8564	46.4406	0.0120666	2164	mt	0.56012	1.52616	0.558789	0.558789	0.598641	FALSE	0.304866	0.427315	0.300276
S154WTS022	Linari:2016appalachian	-80.8142	36.5633	8.95833e-05	1423	ss	0.37058	0.0161205	0.378991	0.378991	0.419067	TRUE	0.158846	0.0539978	0.0895695
S108WTS002	Portenga:2015bhutanese	89.6127	28.0779	0.0153903	870	mt	0.53414	1.14269	0.535193	0.535193	0.594253	FALSE	0.266499	0.381269	0.314769
S135WTS001	Struth:2016colombia	-73.8595	4.67208	0.0173708	2235	sm	0.26495	0.07583	0.279005	0.279005	0.322016	FALSE	0.14949	0.0726473	0.140325
S130WTS015	Schildgen:2016argentina	-65.2601	-23.4292	0.0159514	1318	ss	0.3101	0.01741	0.342301	0.342301	0.391229	TRUE	0.129187	0.0809449	0.130981
S253WTS003	Chen:2020morakot	120.901	22.6745	0.0140778	2929	mt	0.46638	2.64116	0.496121	0.496121	0.56793	FALSE	0.177445	0.237657	0.19437
S103WTS018	Godard:2014himalayan	85.2906	28.0158	0.0134465	3462	mt	0.53189	0.785722	0.558403	0.558403	0.618161	TRUE	0.306829	0.20923	0.355248
S226WTS019	Tofelde:2018hillslope	-65.85	-24.9325	0.0156181	866	mt	0.46468	3.42752	0.480717	0.480717	0.53834	TRUE	0.257449	0.134709	0.278399
S102WTS001	Li:2014tibetan	88.6034	33.2576	0.0145155	536	ss	0.12055	0.01185	0.122926	0.122926	0.13784	FALSE	0.0306588	0.0168664	0.0178971
S182WTS018	Schmidt:2016yunnan	100.8	24.2337	0.0157312	1382	ss	0.30448	0.09706	0.340911	0.340911	0.447399	FALSE	0.0926496	0.138058	0.0905256
S121WTS019	Dixon:2016alps	15.8183	47.5302	0.0115035	1227	mt	0.29624	0.0789	0.313476	0.313476	0.341482	FALSE	0.0922505	0.0591654	0.0675025
S019WTS001	Perg:2003cruz	-122.293	37.3414	0.0133773	846	ss	0.2025	0.17211	0.224033	0.224033	0.271314	FALSE	0.0463036	0.0656626	0.0397153
S082WTS012	Bookhagen:2012andes	-65.4363	-24.515	0.0153009	1681	ss	0.30275	0.87219	0.324376	0.324376	0.392766	FALSE	0.104291	0.108234	0.0958222
S264WTS013	Kim:2016korean	129.399	35.7189	0.00339167	1458	vb	0.19217	0.08612	0.244912	0.244912	0.322712	FALSE	0.0447559	0.091922	0.0415109
S120WTS005	Regard:2016cameroon	11.8477	3.2097	0.0171187	1521	mt	0.04067	0.00149	0.0562612	0.0562612	0.0620736	FALSE	0.00281327	0.0125396	0.0118458
S146WTS006	Burdis:2016nelson	172.733	-41.5174	0.0127972	1493	su	0.18676	0.40799	0.211029	0.211029	0.262471	FALSE	0.0378619	0.0684786	0.0363361
S138WTS012	Molliex:2016mediterranean	9.38845	42.4078	0.0125861	1033	mt	0.34464	0.1098	0.380543	0.380543	0.434297	FALSE	0.122637	0.104753	0.0970567
S127WTS009	Kober:2015bolivian	-65.8964	-17.8593	0.0159312	783	sm	0.30403	0.04103	0.34362	0.34362	0.420116	FALSE	0.108211	0.104413	0.0885114
S159WTS020	Acosta:201vegetation	36.7207	2.19846	0.0166625	589	vb	0.20565	0.06714	0.22669	0.22669	0.269446	FALSE	0.0890118	0.0737956	0.0737959
S110WTS010	Ansberque:2015longriba	103.396	33.003	0.0103618	1171	ss	0.3149	0.11706	0.335291	0.335291	0.402277	FALSE	0.070407	0.100449	0.0588861
S015WTS019	Matmon:2003smoky	-83.3396	35.5877	0.0134123	1634	mt	0.33672	0.02917	0.373165	0.373165	0.439826	FALSE	0.0991518	0.107734	0.0810631
S059WTS003	Abbuehl:2010peruvian	-79.9736	-4.93459	0.012304	1577	pa	0.37964	0.10717	0.393009	0.393009	0.468169	FALSE	0.198731	0.108995	0.192129
S268WTS005	Adams:2020climate	90.1612	27.0178	0.00995833	3228	mt	0.41771	0.77576	0.433954	0.433954	0.485881	FALSE	0.204541	0.128462	0.197547
S128WTS005	McPhillips:2013cordillera	-75.6303	-13.478	0.0159465	553	sc	0.34982	0.04818	0.408969	0.408969	0.478225	FALSE	0.148029	0.227677	0.157202
S038WTS015	Bierman:2007namibian	15.3079	-21.1842	0.0151412	213	mt	0.0234	0.00689	0.028171	0.028171	0.0296229	FALSE	0.00621048	0.00234065	0.0052678
S249WTS021	Heineke:2019menderes	27.6459	37.9187	0.000274034	790	ss	0.1839	0.07095	0.186004	0.186004	0.24754	FALSE	0.0392242	0.0308608	0.0231765
S149WTS007	Gonzalez:2016panamanian	-79.9831	8.63282	0.0160479	2378	vi	0.19435	0.11308	0.206517	0.206517	0.247527	FALSE	0.0586954	0.0573395	0.0434452
S108WTS024	Portenga:2015bhutanese	90.0272	27.5719	0.013409	1730	mt	0.49708	0.12444	0.520047	0.520047	0.589552	FALSE	0.210538	0.346643	0.225648
S059WTS004	Abbuehl:2010peruvian	-79.9931	-4.95387	0.0150695	1481	pa	0.35112	0.080405	0.369245	0.369245	0.433829	TRUE	0.1801	0.10218	0.169687
S010WTS026	Kirchner:2001mountain	-115.379	45.6625	0.0112965	1256	mt	0.19712	0.02708	0.212665	0.212665	0.238426	FALSE	0.0571401	0.0368424	0.0408444
S082WTS017	Bookhagen:2012andes	-65.058	-25.4681	0.0145758	966	sm	0.22987	1.09047	0.323509	0.323509	0.414089	FALSE	0.101994	0.118717	0.0977967
S021WTS005	vonBlanckenburg:2004tropical	80.7539	7.39075	0.0110257	1691	mt	0.27132	0.01535	0.295933	0.295933	0.352434	FALSE	0.0990573	0.107153	0.0777185
S030WTS004	Vanacker:2007escarpment	80.783	6.80193	4.83359e-05	2561	mt	0.13554	0.0017	0.131567	0.131567	0.171649	FALSE	0.00433705	0.00760837	0.00717248
S260WTS018	He:2020weihe	108.751	33.8989	0.0131965	1257	mt	0.47657	0.0834	0.527989	0.527989	0.639408	FALSE	0.176013	0.422657	0.210123
S206WTS003	Val:2018andes	-69.0061	-30.3447	0.0131965	318	ss	0.22305	0.12151	0.240581	0.240581	0.32482	FALSE	0.0918036	0.0769683	0.066511
S073WTS002	Siame:2011taiwan	121.397	24.4413	0.014295	3665	ss	0.53385	1.1622	0.56459	0.56459	0.637378	FALSE	0.22538	0.290181	0.257308
S025WTS033	Safran:2005bolivian	-67.261	-16.864	0.0150265	1608	sm	0.51179	0.298217	0.54273	0.54273	0.617387	TRUE	0.262796	0.264244	0.331612
S078WTS018	Hippe:2012altiplano	-67.5533	-17.2856	0.0149675	808	sm	0.10967	0.00781	0.128305	0.128305	0.155468	FALSE	0.0276098	0.0187222	0.0188902
S071WTS012	Henck:2011three	98.6966	31.7253	0.0133123	1090	ss	0.39359	0.10555	0.403622	0.403622	0.443259	FALSE	0.182589	0.074368	0.198035
S034WTS005	Binnie:2007developing	-116.954	34.0839	3.81996e-05	918	pa	0.61817	1.13438	0.611678	0.611678	0.763251	FALSE	0.13105	0.0855318	0.12702
S101WTS033	Munack:2014outpaced	77.4031	34.0597	0.0128162	493	pb	0.5144	0.06417	0.53863	0.53863	0.615052	FALSE	0.221989	0.25756	0.241837
S052WTS015	Stock:2009wasatch	-111.8	40.5185	0.000263347	787	pa	0.44073	0.08343	0.466084	0.466084	0.536061	FALSE	0.188379	0.0677011	0.192901
S018WTS009	Morel:2003wutach	8.24951	47.8562	3.07667e-05	1342	ss	0.049	0.01477	0.0551028	0.0551028	0.0983399	FALSE	0.00905533	0.00400145	0.00615519
S082WTS016	Bookhagen:2012andes	-65.6396	-24.644	0.0137389	1511	sm	0.40159	0.14247	0.415923	0.415923	0.481569	FALSE	0.201237	0.103479	0.181391
S130WTS008	Schildgen:2016argentina	-65.5612	-23.5713	0.00158542	826	ss	0.36943	0.251145	0.382643	0.382643	0.429362	TRUE	0.181276	0.0520557	0.122104
S218WTS016	Matmon:2018namibia	14.214	-21.4083	0.014059	63	pb	0.05955	0.00141	0.0716749	0.0716749	0.0820879	FALSE	0.010504	0.0172696	0.0108524
S115WTS015	Adams:2016bhutan	91.1385	27.6727	0.00122083	1939	mt	0.57801	0.11117	0.609723	0.609723	0.647272	FALSE	0.233192	0.341481	0.282519
S257WTS020	Butler:2007orange	20.106	-28.6423	0.0130785	127	mt	0.01726	0.00199	0.0233522	0.0233522	0.0202903	FALSE	0.00722382	0.0022933	0.00556601
S127WTS048	Kober:2015bolivian	-63.8607	-19.735	0.0140139	966	sm	0.22556	0.26066	0.285707	0.285707	0.384224	FALSE	0.0494879	0.124128	0.0547993
S164WTS053	Mandal:2015indian	76.631	11.3305	0.0145868	1806	pa	0.20039	0.00614	0.240143	0.240143	0.293551	FALSE	0.0521118	0.0658467	0.0540826
S220WTS018	Balco:2013pacific	-123.719	46.0087	0.0102604	2580	ss	0.19395	0.1619	0.19405	0.19405	0.226209	FALSE	0.0430715	0.0566512	0.0338889
S096WTS004	Glotzbach:2013glacially	6.78686	45.4498	0.0102963	1768	mt	0.5158	1.3987	0.511613	0.511613	0.566405	FALSE	0.26448	0.373108	0.317707
S039WTS047	Sullivan:2007blue	-80.4088	36.7019	0.0117425	1499	ss	0.1511	0.02003	0.186452	0.186452	0.212247	FALSE	0.037752	0.0628146	0.0459319
S193WTS012	Wang:2017wenchuan	103.945	31.3155	0.00614931	1655	ss	0.40243	0.280101	0.42494	0.42494	0.503911	TRUE	0.139908	0.16237	0.121939
S118WTS005	Dirks:2016cradle	27.7516	-25.9025	0.0131243	679	ss	0.08893	0.00237	0.101678	0.101678	0.117915	FALSE	0.020764	0.0135295	0.0143234
S146WTS003	Burdis:2016nelson	172.909	-41.3142	0.0109465	1422	su	0.18018	0.10366	0.209878	0.209878	0.269256	FALSE	0.0254228	0.0780677	0.0339435
S129WTS004	Nobile:2016ambato	-65.9886	-28.2583	0.0128326	756	mt	0.41667	0.11095	0.468011	0.468011	0.554698	FALSE	0.21646	0.17851	0.243597
S159WTS001	Acosta:201vegetation	36.7525	-1.8092	0.0144576	745	vi	0.0383	0.00208	0.051112	0.051112	0.0423487	FALSE	0.0083572	0.0079641	0.00982782
S224WTS020	Young:2018lucia	-121.377	35.9751	0.011725	860	ss	0.28395	0.15176	0.301143	0.301143	0.387194	FALSE	0.0622532	0.107851	0.0571495
S260WTS004	He:2020weihe	109.969	34.4258	0.0119229	931	pa	0.41638	0.09202	0.471192	0.471192	0.573698	FALSE	0.12275	0.451557	0.166811
S140WTS001	Abrahami:2016sikkim	88.2967	27.1815	4.02778e-05	2788	sm	0.56423	0.10583	0.558454	0.558454	0.624932	FALSE	0.204731	0.0897249	0.166794
S015WTS032	Matmon:2003smoky	-83.6829	35.6095	0.0117695	1589	ss	0.28339	0.02151	0.329087	0.329087	0.362866	FALSE	0.0941916	0.0900803	0.0765687
S106WTS014	LeRouxMallouf:2015bhutan	89.6537	27.3058	0.0128139	1777	mt	0.42331	0.077	0.449379	0.449379	0.515401	FALSE	0.209973	0.122761	0.218261
S026WTS088	Reuter:2005susquehanna	-76.3556	40.0897	0.0110535	1106	sc	0.03255	0.00965	0.0387816	0.0387816	0.0376948	FALSE	0.00312161	0.00637608	0.00807887
S093WTS001	Regalla:2013tohoku	140.775	37.4296	0.011423	1725	pa	0.14911	0.084	0.175999	0.175999	0.215656	FALSE	0.0316751	0.0555324	0.0319072
S015WTS030	Matmon:2003smoky	-83.3589	35.6868	0.0116855	1567	ss	0.35535	0.03065	0.377582	0.377582	0.442718	FALSE	0.114674	0.113122	0.0979757
S183WTS022	Kim:2017seti	83.8875	28.374	0.0126583	3714	mt	0.52258	0.24995	0.518252	0.518252	0.582934	FALSE	0.28512	0.218282	0.323095
S086WTS015	Godard:2012marsyandi	84.3097	28.3625	0.0125402	3577	mt	0.53738	2.58174	0.552484	0.552484	0.595365	FALSE	0.344248	0.310752	0.470465
S021WTS008	vonBlanckenburg:2004tropical	80.7494	7.09987	0.00171645	2233	mt	0.26059	0.00501	0.267812	0.267812	0.31949	FALSE	0.123152	0.0478416	0.0910169
S099WTS008	Kirby:2013kunlun	101.281	34.684	0.0117072	897	sm	0.23072	0.05241	0.240916	0.240916	0.282837	FALSE	0.0422359	0.051519	0.0335057
S101WTS026	Munack:2014outpaced	76.7753	34.5201	0.0116831	520	pa	0.5044	0.08599	0.511748	0.511748	0.582726	FALSE	0.232731	0.258363	0.270074
S015WTS042	Matmon:2003smoky	-83.657	35.5251	0.0115137	1723	mt	0.30471	0.02028	0.329829	0.329829	0.390774	FALSE	0.0791595	0.0891738	0.0643731
S071WTS031	Henck:2011three	97.8691	29.7679	0.0122208	844	sc	0.37838	0.03201	0.384029	0.384029	0.425209	FALSE	0.135588	0.0785361	0.10983
S264WTS012	Kim:2016korean	129.411	35.8026	0.0113958	1392	ss	0.18755	0.12954	0.244402	0.244402	0.332745	FALSE	0.0336755	0.106504	0.0405378
S117WTS009	Chadwick:2013weathering	31.3983	-25.0809	0.012684	704	pa	0.03655	0.0042875	0.0440303	0.0440303	0.0464182	TRUE	0.0065531	0.003529	0.00652211
S116WTS001	Bierman:2014view	23.6395	-33.5382	0.0102896	530	ss	0.20637	0.00378	0.253061	0.253061	0.318376	FALSE	0.046209	0.097783	0.0466665
S061WTS016	Insel:2010bolivian	-63.2818	-19.7465	0.0131678	1192	sm	0.26386	0.326877	0.295758	0.295758	0.412827	TRUE	0.0467303	0.202086	0.0603798
S117WTS003	Chadwick:2013weathering	31.2318	-23.0389	4.16667e-05	485	mt	0.0145	0.00458	0.0222259	0.0222259	0.0193465	FALSE	0.0011693	0.000733745	0.00209976
S010WTS015	Kirchner:2001mountain	-115.408	45.9959	3.05198e-05	1656	mt	0.23755	0.02743	0.248988	0.248988	0.294833	FALSE	0.0501739	0.0438908	0.0309331
S096WTS005	Glotzbach:2013glacially	6.79117	45.4489	0.00975115	1774	mt	0.5216	0.50266	0.515816	0.515816	0.570861	FALSE	0.265198	0.387068	0.320984
S186WTS034	Portenga:2019potomac	-77.8006	39.0967	0.0047375	1084	pa	0.06709	0.01143	0.0769439	0.0769439	0.0876952	FALSE	0.0149708	0.00864979	0.0120934
S014WTS028	Clapp:2002arid	-114.502	33.1908	0.0116109	109	su	0.07921	0.02748	0.115725	0.115725	0.176733	FALSE	0.0135451	0.051328	0.0210044
S161WTS032	Vanacker:2015transient	-78.8093	-3.16111	4.375e-05	1564	py	0.30699	0.00731	0.29827	0.29827	0.400951	FALSE	0.113624	0.0390333	0.0706181
S101WTS009	Munack:2014outpaced	77.8714	33.9261	0.0114331	500	nd	0.4474	0.02064	0.451973	0.451973	0.507491	FALSE	0.180822	0.0987478	0.162566
S082WTS022	Bookhagen:2012andes	-65.3002	-22.8315	0.012684	1143	ss	0.20026	0.00342	0.20776	0.20776	0.237255	FALSE	0.0530865	0.0287929	0.0343841
S181WTS010	Rossi:2017baja	-115.341	31.0142	0.00289583	270	pa	0.57116	0.13305	0.69779	0.69779	0.770636	FALSE	0.236766	1.03383	0.305067
S062WTS013	Meyer:2008rhenish	8.22832	51.4306	0.00856904	1146	ss	0.09245	0.03858	0.10635	0.10635	0.130767	FALSE	0.0165744	0.0153534	0.0150352
S257WTS017	Butler:2007orange	27.4052	-31.4131	0.0117188	647	ss	0.12091	0.01569	0.129474	0.129474	0.144879	FALSE	0.0298898	0.019355	0.0184177
S067WTS001	Placzek:2010atacama	-68.594	-24.2205	0.0122375	111	su	0.1384	0.00095	0.149298	0.149298	0.185309	FALSE	0.0667255	0.026978	0.0392793
S062WTS006	Meyer:2008rhenish	8.43696	51.4306	0.00854612	1113	ss	0.09877	0.02216	0.112586	0.112586	0.126112	FALSE	0.0185005	0.0182337	0.0159841
S147WTS007	Larsen:2014rapid	170.396	-43.3944	7.70833e-05	5220	mt	0.66398	8.42185	0.681536	0.681536	0.743428	FALSE	0.216403	0.171378	0.231772
S025WTS045	Safran:2005bolivian	-67.5532	-16.501	0.0129568	1807	sm	0.52133	0.23509	0.554118	0.554118	0.619207	FALSE	0.258761	0.201074	0.31595
S037WTS031	Wittmann:2007switzerland	8.48508	46.4937	0.0092588	2677	mt	0.48371	0.645953	0.488722	0.488722	0.52931	TRUE	0.230888	0.271958	0.230176
S010WTS014	Kirchner:2001mountain	-115.398	45.9948	7.31893e-05	1638	mt	0.27436	0.03756	0.28225	0.28225	0.323653	FALSE	0.0879389	0.037596	0.0445692
S030WTS007	Vanacker:2007escarpment	80.7774	6.79199	9.31672e-05	2586	mt	0.17872	0.00255	0.181284	0.181284	0.253298	FALSE	0.0240168	0.0415325	0.019668
S042WTS001	Binnie:2008bernardino	-116.938	34.1018	7.7507e-05	883	mt	0.54703	0.18993	0.532263	0.532263	0.586766	FALSE	0.27654	0.0470277	0.184425
S135WTS014	Struth:2016colombia	-73.9702	4.68455	0.0132701	1445	ss	0.18555	0.01713	0.19525	0.19525	0.231995	FALSE	0.0583411	0.0414288	0.0377776
S151WTS018	Derrieux:2014taiwan	120.81	23.1115	0.0116493	3594	sm	0.55206	1.8229	0.579629	0.579629	0.634298	FALSE	0.247443	0.287205	0.304288
S164WTS062	Mandal:2015indian	75.7214	12.4949	0.012975	3536	mt	0.16355	0.01908	0.19736	0.19736	0.249973	FALSE	0.0371885	0.0497426	0.0345525
S025WTS025	Safran:2005bolivian	-68.1527	-16.2092	0.0127375	2535	sm	0.56558	0.41527	0.516158	0.516158	0.589196	FALSE	0.261281	0.39222	0.317224
S081WTS016	Roller:2012rwenzori	29.7774	0.123463	0.0132459	3643	mt	0.27155	0.03173	0.297478	0.297478	0.37904	FALSE	0.108067	0.0919691	0.0949484
S121WTS003	Dixon:2016alps	14.8423	47.1039	0.00897778	1012	mt	0.34657	0.06713	0.367366	0.367366	0.416512	FALSE	0.11346	0.0865464	0.0928685
S060WTS003	Palumbo:2010control	99.6274	39.2044	0.000129329	234	ss	0.18824	0.128865	0.258213	0.258213	0.46039	TRUE	0.0427433	0.14527	0.0486177
S096WTS007	Glotzbach:2013glacially	7.11318	45.3839	0.00922353	1886	mt	0.4433	0.48068	0.445574	0.445574	0.486774	FALSE	0.212906	0.320793	0.210946
S093WTS006	Regalla:2013tohoku	140.726	37.6721	0.0103587	1711	pa	0.14363	0.05455	0.157119	0.157119	0.187903	FALSE	0.0212412	0.0456866	0.0252112
S021WTS010	vonBlanckenburg:2004tropical	80.7993	7.07334	0.0120155	1984	mt	0.28502	0.03625	0.359974	0.359974	0.412483	FALSE	0.171234	0.114861	0.154484
S010WTS007	Kirchner:2001mountain	-115.339	46.0005	6.50186e-05	1317	mt	0.30014	0.04754	0.319795	0.319795	0.361693	FALSE	0.0853308	0.0457057	0.0543871
S015WTS034	Matmon:2003smoky	-83.4236	35.5372	0.0104249	1705	mt	0.3248	0.02078	0.352226	0.352226	0.42729	FALSE	0.0902026	0.0990294	0.0743848
S164WTS073	Mandal:2015indian	75.1607	13.3226	0.0122208	6372	mt	0.16473	0.01407	0.192131	0.192131	0.239012	FALSE	0.0345276	0.0525526	0.0314067
S025WTS023	Safran:2005bolivian	-67.6042	-16.1134	0.0122974	2322	sm	0.5458	0.14312	0.592557	0.592557	0.685607	FALSE	0.210115	0.258535	0.273437
S154WTS035	Linari:2016appalachian	-82.3504	35.5477	0.00128889	1578	mt	0.2136	0.0116	0.240247	0.240247	0.263096	FALSE	0.0465041	0.0478283	0.0326124
S249WTS001	Heineke:2019menderes	27.9214	38.4042	0.00996268	812	mt	0.21404	0.28268	0.239589	0.239589	0.285077	FALSE	0.0699531	0.0685405	0.0754532
S186WTS047	Portenga:2019potomac	-79.4774	39.2255	0.000895833	1631	ss	0.131	0.01389	0.146991	0.146991	0.156412	FALSE	0.0220063	0.0158219	0.0155249
S073WTS008	Siame:2011taiwan	121.385	24.4386	0.0115552	3633	ss	0.5353	1.57878	0.564243	0.564243	0.636082	FALSE	0.228787	0.30299	0.257919
S055WTS003	DiBiase:2010gabriel	-118.053	34.3194	0.0104292	590	pa	0.26256	0.1178	0.289321	0.289321	0.36859	TRUE	0.0808618	0.0819335	0.0665064
S082WTS040	Bookhagen:2012andes	-65.5181	-24.6618	0.0114474	1578	ss	0.34374	0.29879	0.370966	0.370966	0.457157	FALSE	0.123742	0.14345	0.11286
S127WTS012	Kober:2015bolivian	-66.4593	-17.3583	0.0118826	1261	sm	0.33642	0.62682	0.387387	0.387387	0.456074	FALSE	0.156261	0.168005	0.16226
S110WTS015	Ansberque:2015longriba	103.672	32.6791	0.0103833	1067	ss	0.3832	0.20374	0.390649	0.390649	0.433626	FALSE	0.137742	0.0713225	0.105428
S167WTS002	Matsushi:2014yield	137.806	36.3979	7.43056e-05	2054	pa	0.37914	0.2453	0.392157	0.392157	0.548622	FALSE	0.0767746	0.133452	0.065275
S101WTS015	Munack:2014outpaced	77.5597	33.9446	0.0103179	526	sm	0.4435	0.06894	0.0371975	0.0371975	0.042536	FALSE	0.178614	0.236889	0.179097
S049WTS016	Densmore:2009footwalls	-118.599	38.3585	7.23275e-05	164	pa	0.37531	0.51425	0.429235	0.429235	0.533758	FALSE	0.107957	0.037668	0.072014
S127WTS038	Kober:2015bolivian	-64.6839	-18.2215	0.0116972	558	sm	0.24745	0.06494	0.292533	0.292533	0.376582	FALSE	0.0704451	0.102814	0.0629017
S146WTS004	Burdis:2016nelson	172.87	-41.3882	0.00807222	1365	su	0.22669	0.06557	0.261536	0.261536	0.337893	FALSE	0.0365276	0.0902216	0.0405718
S015WTS056	Matmon:2003smoky	-83.546	35.6086	0.00998997	1701	ss	0.29081	0.0423606	0.330837	0.330837	0.390196	TRUE	0.0876617	0.0946871	0.0693575
S179WTS006	DeLong:2017andreas	-123.354	38.8078	0.00950903	1413	ss	0.28606	0.15942	0.331414	0.331414	0.403464	FALSE	0.0637617	0.095414	0.0577507
S069WTS031	Norton:2011alps	11.6231	47.2091	0.00828087	1557	mt	0.45103	0.50449	0.451315	0.451315	0.486852	FALSE	0.293624	0.133508	0.254477
S051WTS003	Cox:2009madagascar	46.8983	-18.9494	0.0115248	1609	mt	0.13973	0.01441	0.165287	0.165287	0.241113	FALSE	0.0174178	0.0516924	0.0272484
S271WTS018	Brocard:2021guatemala	-90.6083	15.0304	0.00295972	1563	mt	0.39622	0.09988	0.417347	0.417347	0.490013	FALSE	0.179142	0.125892	0.161445
S057WTS008	Delunel:2010pelvoux	5.89502	44.9881	0.0085773	2049	va	0.59012	0.28791	0.589173	0.589173	0.64045	FALSE	0.275926	0.405439	0.29291
S265WTS008	Kim:2020taebaek	128.783	37.593	0.00569653	2024	pa	0.1888	0.05903	0.231066	0.231066	0.291359	FALSE	0.0394205	0.0679269	0.0370196
S103WTS016	Godard:2014himalayan	83.5298	28.2609	0.010666	2751	sm	0.4435	0.22789	0.46048	0.46048	0.512095	FALSE	0.211082	0.170441	0.196261
S139WTS001	Olivetti:2016massif	4.66137	45.4216	0.00427917	938	pa	0.21846	0.03093	0.226068	0.226068	0.246976	FALSE	0.0835141	0.0254698	0.0507121
S001WTS004	Granger:1996averaged	-120.067	40.0913	7.03893e-05	299	pa	0.19555	0.0496871	0.24119	0.24119	0.289472	TRUE	0.0475746	0.0238936	0.0293607
S059WTS010	Abbuehl:2010peruvian	-79.8661	-5.04547	0.0120239	1618	pa	0.38146	0.12526	0.397503	0.397503	0.472478	FALSE	0.19317	0.117154	0.192029
S164WTS040	Mandal:2015indian	75.0956	13.4441	0.0117229	6522	mt	0.22372	0.01367	0.255327	0.255327	0.306035	FALSE	0.0847567	0.125526	0.0798934
S149WTS029	Gonzalez:2016panamanian	-82.3355	8.96911	0.0119042	3052	va	0.30224	0.10233	0.324768	0.324768	0.394454	FALSE	0.10908	0.103266	0.0936306
S182WTS045	Schmidt:2016yunnan	100.457	21.7536	0.0111653	1932	mt	0.20635	0.04935	0.238996	0.238996	0.340716	FALSE	0.0443297	0.0988097	0.0545323
S011WTS014	Bierman:2001background	-123.826	44.5027	0.00855631	2869	ss	0.2758	0.22676	0.309481	0.309481	0.383056	FALSE	0.0476993	0.118894	0.0537936
S136WTS008	Schaller:2016european	3.24123	46.0222	0.00830069	816	sm	0.03053	0.01587	0.031257	0.031257	0.0318438	FALSE	0.00454396	0.00283172	0.00527057
S138WTS014	Molliex:2016mediterranean	9.0332	42.276	0.00886875	1130	pa	0.37794	0.05049	0.401149	0.401149	0.445308	FALSE	0.157784	0.122785	0.160798
S110WTS004	Ansberque:2015longriba	102.396	32.5704	0.0100896	969	sm	0.1617	0.04104	0.173194	0.173194	0.196251	FALSE	0.0231865	0.0371157	0.0234103
S141WTS001	Munack:2016indus	78.2044	32.9853	0.0100359	504	su	0.28489	0.01913	0.295426	0.295426	0.320147	FALSE	0.148254	0.0545802	0.10741
S010WTS021	Kirchner:2001mountain	-115.692	45.0615	0.000729009	935	pa	0.41086	0.10003	0.418977	0.418977	0.487676	FALSE	0.185097	0.0983033	0.143054
S082WTS020	Bookhagen:2012andes	-65.2171	-22.8725	0.0109666	1355	su	0.3666	0.12785	0.383593	0.383593	0.436915	FALSE	0.177018	0.0717937	0.158802
S192WTS025	Arkle:2017trinidad	-61.6044	10.7212	0.00144583	1719	mt	0.24178	0.03275	0.273362	0.273362	0.318509	FALSE	0.0422971	0.0638601	0.0393036
S014WTS030	Clapp:2002arid	-114.499	33.2027	0.00992403	111	su	0.06784	0.02444	0.115355	0.115355	0.17679	FALSE	0.0133147	0.0523138	0.0210474
S061WTS014	Insel:2010bolivian	-63.3089	-19.5213	0.0111708	1231	sm	0.2346	0.30663	0.266871	0.266871	0.385919	FALSE	0.0408564	0.168342	0.0529598
S121WTS024	Dixon:2016alps	15.5898	46.9777	0.00808542	923	sm	0.11891	0.09688	0.138626	0.138626	0.157839	FALSE	0.0121286	0.0383109	0.0210333
S149WTS037	Gonzalez:2016panamanian	-79.3365	9.4664	0.0116396	3158	vb	0.20371	0.190013	0.224517	0.224517	0.288937	TRUE	0.039267	0.0698936	0.0391003
S088WTS015	Savi:2014zielbach	11.0083	46.7233	0.00182487	1565	mt	0.4778	0.4481	0.487295	0.487295	0.565641	FALSE	0.192689	0.413295	0.212846
S161WTS021	Vanacker:2015transient	-78.8871	-2.95832	7.70833e-05	1108	py	0.14181	0.0194575	0.156536	0.156536	0.191171	TRUE	0.0409206	0.0144625	0.0171007
S115WTS011	Adams:2016bhutan	90.6092	27.6181	0.0103979	1869	mt	0.33071	0.0722	0.348519	0.348519	0.403105	FALSE	0.151507	0.0948909	0.129177
S058WTS008	Norton:2010rhone	8.21029	46.491	0.00106111	2614	mt	0.57756	1.2981	0.597252	0.597252	0.647397	FALSE	0.307844	0.256709	0.347789
S025WTS001	Safran:2005bolivian	-68.5928	-15.8603	0.0111832	2100	sm	0.42785	0.77681	0.432708	0.432708	0.483778	FALSE	0.289094	0.177959	0.362189
S164WTS006	Mandal:2015indian	76.4514	11.1018	0.011375	3478	pa	0.27975	0.04688	0.324769	0.324769	0.381982	FALSE	0.118783	0.163028	0.148802
S165WTS034	Cyr:2014distinguishing	16.5648	39.4531	0.00889444	1106	pa	0.28276	0.46422	0.322841	0.322841	0.382673	FALSE	0.0939614	0.0946596	0.0953425
S076WTS023	Andermann:2011nepal	85.6083	27.6295	0.0102687	1638	mt	0.26069	0.17084	0.27887	0.27887	0.348484	FALSE	0.0711901	0.0790501	0.0588247
S115WTS033	Adams:2016bhutan	90.4152	27.5331	0.00136667	1805	mt	0.45917	0.08417	0.478407	0.478407	0.547331	FALSE	0.213915	0.103726	0.186425
S072WTS004	Dortch:2011ladakh	77.3268	34.3162	0.00955954	651	pa	0.4781	0.03551	0.487764	0.487764	0.547578	FALSE	0.201373	0.162253	0.201506
S109WTS004	Rades:2015graben	86.7915	31.3541	0.00129375	681	ss	0.45103	0.03274	0.468742	0.468742	0.531429	FALSE	0.180508	0.109702	0.154778
S035WTS008	Vanacker:2007vegetation	-78.9379	-3.0428	0.0114415	1084	py	0.23642	0.03738	0.256401	0.256401	0.325776	TRUE	0.0502319	0.0651495	0.0429662
S165WTS035	Cyr:2014distinguishing	16.5215	39.4911	0.00115972	1019	pa	0.15981	0.0928	0.200945	0.200945	0.241722	FALSE	0.0396309	0.0554666	0.0357342
S086WTS003	Godard:2012marsyandi	84.3814	28.0268	0.0100668	2762	mt	0.29682	0.0697	0.310767	0.310767	0.375818	FALSE	0.0757275	0.0992588	0.0624422
S220WTS019	Balco:2013pacific	-123.656	46.0718	0.00790278	2294	ss	0.15761	0.22788	0.165989	0.165989	0.195393	FALSE	0.0371387	0.0406996	0.0284544
S261WTS043	Riley:2020staircase	-111.895	37.604	0.00901389	301	ss	0.19118	0.30958	0.207018	0.207018	0.282577	FALSE	0.0384765	0.0963186	0.0376248
S253WTS025	Chen:2020morakot	120.74	22.2977	0.0105007	2644	ss	0.41566	0.07733	0.442527	0.442527	0.537025	FALSE	0.117754	0.160367	0.112974
S186WTS016	Portenga:2019potomac	-77.1355	39.1766	0.00162153	1161	mt	0.0281	0.00982	0.0451454	0.0451454	0.0499007	FALSE	0.00382601	0.00859272	0.00906926
S104WTS015	Scherler:2013garhwal	78.3444	31.1853	0.00969097	1822	mt	0.6081	1.87491	0.611481	0.611481	0.67071	FALSE	0.351658	0.574727	0.473101
S179WTS011	DeLong:2017andreas	-123.222	38.5737	0.00884514	1436	ss	0.21158	0.15269	0.254163	0.254163	0.310284	FALSE	0.0405084	0.073186	0.0419524
S207WTS010	Stutenbecker:2018rhone	7.62436	46.2716	0.00144514	1142	ss	0.62079	9.0513	0.67355	0.67355	0.763573	FALSE	0.316574	0.42418	0.403329
S271WTS008	Brocard:2021guatemala	-90.1896	14.9954	0.0107993	1509	mt	0.30551	0.0603125	0.319523	0.319523	0.36673	TRUE	0.15267	0.0713747	0.122842
S271WTS014	Brocard:2021guatemala	-90.434	15.1328	0.00342083	1641	mt	0.27047	0.01671	0.283776	0.283776	0.359434	FALSE	0.0649343	0.0820433	0.0526905
S226WTS012	Tofelde:2018hillslope	-65.8888	-24.6622	0.0101361	912	mt	0.41146	0.10571	0.432036	0.432036	0.501254	TRUE	0.17893	0.11662	0.184646
S177WTS019	Puchol:2014himalayan	84.2703	28.3973	0.00305486	3975	pa	0.52511	3.28049	0.544065	0.544065	0.579157	TRUE	0.318133	0.360539	0.404301
S059WTS009	Abbuehl:2010peruvian	-79.8636	-5.03916	0.0111	1631	pa	0.37322	0.10036	0.390643	0.390643	0.465948	FALSE	0.18958	0.115177	0.1859
S037WTS020	Wittmann:2007switzerland	8.47727	46.2776	0.00768751	2600	mt	0.53756	0.87017	0.552314	0.552314	0.582158	FALSE	0.248214	0.398617	0.259803
S050WTS036	Ouimet:2009threshold	103.225	31.9717	0.0094125	1333	sm	0.61993	0.247	0.618983	0.618983	0.728942	FALSE	0.278463	0.400058	0.323367
S115WTS021	Adams:2016bhutan	89.9221	27.2843	0.00369931	1977	mt	0.5219	0.16433	0.527879	0.527879	0.590923	FALSE	0.287358	0.116203	0.329696
S121WTS023	Dixon:2016alps	15.5428	47.4457	0.00741181	1063	mt	0.33716	0.09237	0.358693	0.358693	0.410533	FALSE	0.10315	0.0971144	0.0805031
S115WTS012	Adams:2016bhutan	91.2472	27.4691	0.00540903	2485	sm	0.52579	0.14392	0.539764	0.539764	0.583742	FALSE	0.356461	0.156969	0.476406
S075WTS002	Moon:2011washington	-121.127	47.7135	0.00731223	2699	pa	0.47718	0.38811	0.481719	0.481719	0.526098	FALSE	0.172661	0.179598	0.150411
S044WTS001	Norton:2008swiss	8.0003	47.0075	0.00739999	1615	sm	0.28717	0.23957	0.339839	0.339839	0.404912	FALSE	0.058683	0.146679	0.0636349
S106WTS010	LeRouxMallouf:2015bhutan	89.4651	27.4498	0.0013	814	mt	0.38594	0.04128	0.390786	0.390786	0.432176	FALSE	0.209053	0.0527748	0.151632
S135WTS016	Struth:2016colombia	-74.057	5.04192	0.0107097	1658	ss	0.18076	0.00748	0.190551	0.190551	0.230974	FALSE	0.0640831	0.0411323	0.0442817
S264WTS007	Kim:2016korean	129.343	36.8577	0.00856181	1253	pb	0.23496	0.05505	0.309548	0.309548	0.449265	FALSE	0.0495077	0.154241	0.0554816
S108WTS033	Portenga:2015bhutanese	90.01	28.1006	0.00941528	972	mt	0.49323	1.34527	0.466236	0.466236	0.560717	FALSE	0.229651	0.316884	0.248246
S127WTS022	Kober:2015bolivian	-66.328	-18.7235	0.01005	803	sm	0.26912	0.06741	0.315038	0.315038	0.401457	FALSE	0.0772594	0.0980182	0.0697539
S271WTS002	Brocard:2021guatemala	-89.6668	15.1298	0.00165556	2010	mt	0.23893	0.03135	0.264042	0.264042	0.324059	FALSE	0.0782005	0.085388	0.0700727
S044WTS012	Norton:2008swiss	7.88657	46.9871	0.00116458	1930	sm	0.31505	0.2791	0.351942	0.351942	0.425332	FALSE	0.0532731	0.114349	0.0491817
S111WTS033	Olen:2015arun	87.2577	27.6506	0.00941647	4585	mt	0.52279	9.88405	0.543311	0.543311	0.559297	FALSE	0.341922	0.263026	0.417523
S253WTS020	Chen:2020morakot	120.717	22.4543	0.00972361	2817	ss	0.49171	0.81098	0.512675	0.512675	0.584368	TRUE	0.188065	0.179988	0.194723
S257WTS016	Butler:2007orange	26.4119	-31.4886	0.00901389	605	ss	0.07438	0.00664	0.0859365	0.0859365	0.0887174	FALSE	0.0137023	0.0120493	0.0123921
S025WTS014	Safran:2005bolivian	-68.3138	-15.4695	0.0101816	1927	sm	0.49071	0.06702	0.524135	0.524135	0.608581	FALSE	0.189049	0.230232	0.209453
S164WTS059	Mandal:2015indian	76.0211	11.5702	0.0103368	3938	pa	0.17496	0.01664	0.212825	0.212825	0.267397	FALSE	0.0498141	0.0743224	0.0458315
S182WTS024	Schmidt:2016yunnan	100.601	23.6762	0.00156319	1553	ss	0.34117	0.04488	0.377578	0.377578	0.479733	FALSE	0.0861296	0.111167	0.0718362
S089WTS015	Gudmundsdottir:2013cruz	-121.913	37.0877	0.00841173	803	ss	0.2389	0.45463	0.262237	0.262237	0.299917	FALSE	0.0658019	0.0693936	0.0544185
S082WTS033	Bookhagen:2012andes	-65.5177	-26.9105	0.0093858	2129	su	0.27821	0.17818	0.319154	0.319154	0.400845	FALSE	0.104099	0.116397	0.102722
S030WTS003	Vanacker:2007escarpment	80.8004	6.80166	7.63569e-05	2524	mt	0.08842	0.00228	0.091079	0.091079	0.109561	FALSE	0.00466353	0.00729796	0.00775844
S283WTS038	Delunel:2020alps	7.50563	46.744	0.00720515	1651	su	0.23676	0.26322	0.291151	0.291151	0.321387	FALSE	0.113602	0.126064	0.092612
S205WTS013	Fame:2018paraglacial	-4.94047	56.7725	0.00566528	3335	ss	0.36903	0.23834	0.389367	0.389367	0.416436	FALSE	0.125797	0.0944867	0.0881282
S151WTS011	Derrieux:2014taiwan	121.084	24.0219	0.00949583	3212	ss	0.5226	0.56609	0.548793	0.548793	0.625483	FALSE	0.172962	0.23363	0.182431
S282WTS002	Grischott:2017stappitz	13.2497	47.0211	0.00414759	1985	pa	0.5957	0.67966	0.63743	0.63743	0.7021	TRUE	0.340849	0.677043	0.369298
S050WTS008	Ouimet:2009threshold	102.122	29.9282	0.00891396	2197	mt	0.63609	0.36986	0.643674	0.643674	0.753513	FALSE	0.388659	0.406366	0.517766
S106WTS005	LeRouxMallouf:2015bhutan	89.7373	27.5941	0.00632847	1175	mt	0.48885	0.20053	0.511532	0.511532	0.580372	FALSE	0.2506	0.257175	0.25748
S201WTS006	Heineke:2017reservoir	27.7788	38.0091	0.00809517	1036	mt	0.34519	0.39344	0.36443	0.36443	0.446068	FALSE	0.096284	0.114757	0.0833105
S081WTS003	Roller:2012rwenzori	30.3623	0.526319	0.0102582	1185	mt	0.11598	0.0069	0.128755	0.128755	0.154503	FALSE	0.0171542	0.0213801	0.019494
S164WTS026	Mandal:2015indian	75.3634	12.3733	0.00974653	5672	pa	0.27582	0.02287	0.305647	0.305647	0.357532	FALSE	0.0772501	0.0629703	0.0616943
S072WTS006	Dortch:2011ladakh	77.7448	34.2522	0.00847757	609	pa	0.4216	0.06142	0.417693	0.417693	0.462211	FALSE	0.19347	0.0974124	0.197065
S103WTS005	Godard:2014himalayan	84.8326	27.7292	0.00907292	2904	mt	0.46233	0.31815	0.479583	0.479583	0.568823	FALSE	0.152125	0.275542	0.158366
S182WTS043	Schmidt:2016yunnan	100.529	21.8591	0.00946736	1857	pa	0.20409	0.06606	0.229309	0.229309	0.311551	FALSE	0.0550603	0.0696215	0.046041
S138WTS001	Molliex:2016mediterranean	9.33387	42.5717	0.00746389	896	mt	0.25487	0.04499	0.277961	0.277961	0.314469	FALSE	0.100191	0.0556377	0.0748825
S069WTS022	Norton:2011alps	9.51292	46.2596	0.00696873	1760	mt	0.70377	0.79009	0.0842569	0.0842569	0.10202	FALSE	0.385792	0.411799	0.377867
S103WTS010	Godard:2014himalayan	83.9874	28.0412	0.00889236	3219	sm	0.34956	0.11962	0.371353	0.371353	0.454613	FALSE	0.0938545	0.147199	0.0864145
S139WTS023	Olivetti:2016massif	4.59398	45.0814	0.00710833	1185	mt	0.24818	0.03563	0.261587	0.261587	0.284957	FALSE	0.0589393	0.044714	0.0423619
S209WTS003	Rosenkranz:2018shillong	91.4734	25.4166	0.00906458	6554	pa	0.11394	0.18706	0.156364	0.156364	0.220406	FALSE	0.0225226	0.0544946	0.0309843
S253WTS012	Chen:2020morakot	120.814	22.371	0.00921458	2873	ss	0.41697	0.335023	0.443334	0.443334	0.515138	TRUE	0.134618	0.154889	0.12866
S164WTS043	Mandal:2015indian	75.1271	13.2666	0.00165694	6525	mt	0.25459	0.02796	0.276745	0.276745	0.323893	FALSE	0.089376	0.0857183	0.0681364
S107WTS007	Morell:2015gap	78.4284	30.6483	0.00862556	2177	ss	0.4692	0.04303	0.498044	0.498044	0.573068	FALSE	0.165466	0.186955	0.159404
S078WTS016	Hippe:2012altiplano	-67.2985	-17.2164	0.00957429	1227	sm	0.12095	0.0125	0.141095	0.141095	0.163381	FALSE	0.0292851	0.0198976	0.0205287
S056WTS020	Meyer:2010black	8.22716	48.121	0.00667485	1532	pa	0.17233	0.06555	0.198101	0.198101	0.212215	FALSE	0.0447135	0.0570449	0.0492586
S196WTS004	Fellin:2017taiwan	120.805	22.3818	0.00659444	2936	ss	0.44955	1.26293	0.476048	0.476048	0.545818	FALSE	0.154409	0.167286	0.14902
S050WTS005	Ouimet:2009threshold	101.225	29.3182	0.00871392	1797	pa	0.50013	0.31886	0.506407	0.506407	0.565652	FALSE	0.267076	0.178302	0.323589
S185WTS003	Salgado:2016relief	-44.683	-23.0097	0.00155972	2483	mt	0.3827	0.03586	0.412559	0.412559	0.472099	FALSE	0.190727	0.145008	0.175007
S092WTS005	Barreto:2013minas	-43.4674	-19.2731	0.00939193	1930	mt	0.19823	0.00352	0.209224	0.209224	0.257598	FALSE	0.0747169	0.0509461	0.0715767
S165WTS013	Cyr:2014distinguishing	15.9532	37.9894	0.00209653	759	mt	0.31267	1.06636	0.370009	0.370009	0.484527	TRUE	0.101838	0.14161	0.096482
S196WTS010	Fellin:2017taiwan	120.956	22.7476	0.00911042	3024	mt	0.50573	1.69428	0.530047	0.530047	0.602944	TRUE	0.202993	0.279761	0.246086
S055WTS010	DiBiase:2010gabriel	-117.703	34.3307	0.00813359	642	mt	0.50023	0.78821	0.522806	0.522806	0.605271	FALSE	0.19867	0.163841	0.201349
S161WTS036	Vanacker:2015transient	-78.6237	-3.0284	0.00712083	1971	mt	0.46499	0.0868626	0.491906	0.491906	0.5697	TRUE	0.199373	0.178502	0.204225
S260WTS012	He:2020weihe	109.176	33.9301	0.00814583	1157	mt	0.48984	0.08076	0.551034	0.551034	0.703335	FALSE	0.145692	0.437768	0.161125
S164WTS024	Mandal:2015indian	75.9034	12.0032	0.00798056	3833	mt	0.14107	0.01334	0.166256	0.166256	0.195689	FALSE	0.0247523	0.0367055	0.0257971
S050WTS014	Ouimet:2009threshold	101.09	32.2294	0.00829361	1285	sm	0.34135	0.03574	0.363469	0.363469	0.407148	FALSE	0.110724	0.0823567	0.112581
S025WTS029	Safran:2005bolivian	-68.0396	-16.8235	0.00936212	743	sm	0.25974	0.19266	0.291113	0.291113	0.376794	FALSE	0.095442	0.0960105	0.106562
S192WTS014	Arkle:2017trinidad	-61.3486	10.7605	0.00299931	2273	mt	0.20156	0.02322	0.240648	0.240648	0.327479	FALSE	0.0373241	0.0663444	0.0391375
S106WTS002	LeRouxMallouf:2015bhutan	89.6288	27.2096	0.00869028	2276	mt	0.46928	0.08785	0.50406	0.50406	0.554104	FALSE	0.239943	0.270503	0.322715
S104WTS018	Scherler:2013garhwal	77.806	31.2847	0.00832847	2129	mt	0.4841	0.26071	0.501683	0.501683	0.55821	FALSE	0.208421	0.180319	0.197401
S062WTS004	Meyer:2008rhenish	8.33859	51.4306	0.00606967	1116	ss	0.08821	0.04199	0.1076	0.1076	0.123616	FALSE	0.0190594	0.0160667	0.0147577
S138WTS013	Molliex:2016mediterranean	9.38236	42.2813	0.00719583	1068	mt	0.29987	0.06064	0.334855	0.334855	0.382785	FALSE	0.104175	0.0952991	0.0895271
S056WTS002	Meyer:2010black	8.17399	48.5733	0.00642901	1799	pa	0.29725	0.04428	0.314255	0.314255	0.351958	FALSE	0.0840553	0.0725867	0.0631701
S029WTS011	Binnie:2006rapidly	-116.952	34.1286	0.000854167	876	pa	0.47213	0.50142	0.449263	0.449263	0.514797	FALSE	0.204652	0.0959766	0.215812
S164WTS035	Mandal:2015indian	75.5167	12.9502	0.00940556	4876	mt	0.2444	0.0402175	0.266663	0.266663	0.315586	TRUE	0.0803528	0.0744318	0.0651199
S226WTS023	Tofelde:2018hillslope	-65.9153	-24.3519	0.00877986	715	mt	0.24123	0.022235	0.244052	0.244052	0.277054	TRUE	0.0701062	0.0470054	0.0575134
S103WTS009	Godard:2014himalayan	83.9887	28.1181	0.00850417	3437	mt	0.35277	0.10981	0.377887	0.377887	0.462393	FALSE	0.0817281	0.184436	0.0779595
S184WTS002	Penserini:2017cascadia	-124.095	43.4743	0.000251389	2315	ss	0.23961	0.07216	0.292695	0.292695	0.385176	FALSE	0.0294613	0.116739	0.0411007
S069WTS013	Norton:2011alps	10.2435	46.3728	0.00664537	1418	mt	0.5362	0.3572	0.54215	0.54215	0.585293	FALSE	0.279423	0.37153	0.28374
S265WTS010	Kim:2020taebaek	128.942	37.4101	0.00482986	1879	sc	0.29593	0.03887	0.364474	0.364474	0.465661	FALSE	0.0716658	0.139938	0.0653206
S130WTS010	Schildgen:2016argentina	-65.5942	-23.8203	0.00873472	1185	ss	0.3473	0.146195	0.363828	0.363828	0.40575	TRUE	0.202	0.0534948	0.220444
S253WTS023	Chen:2020morakot	120.698	22.3881	0.00562014	2758	ss	0.47514	0.10365	0.502807	0.502807	0.593063	FALSE	0.159385	0.1762	0.163258
S164WTS072	Mandal:2015indian	75.2226	13.205	0.00923889	6309	mt	0.20628	0.01099	0.235487	0.235487	0.286661	FALSE	0.0606541	0.0665387	0.0465431
S262WTS003	Bender:2018yukon	-142.121	63.843	0.00414514	494	mt	0.15164	0.0189	0.17285	0.17285	0.167288	FALSE	0.0433989	0.218845	0.055381
S103WTS024	Godard:2014himalayan	85.9733	27.7812	0.00831042	3132	mt	0.59168	0.91111	0.601346	0.601346	0.662196	FALSE	0.350271	0.315968	0.399011
S271WTS013	Brocard:2021guatemala	-90.3845	15.0701	0.00905833	1626	mt	0.25139	0.02553	0.267111	0.267111	0.326235	FALSE	0.0918377	0.0700653	0.074111
S121WTS014	Dixon:2016alps	13.6838	47.3061	0.00632014	1729	mt	0.56712	0.20823	0.567576	0.567576	0.625015	FALSE	0.255548	0.306786	0.281174
S108WTS021	Portenga:2015bhutanese	89.9466	27.2389	0.00821528	2491	mt	0.52843	0.487803	0.557741	0.557741	0.64057	TRUE	0.227522	0.17881	0.243375
S092WTS004	Barreto:2013minas	-43.4315	-19.3351	0.00878921	1867	mt	0.24299	0.00452	0.264181	0.264181	0.310954	FALSE	0.0861521	0.131457	0.0881007
S034WTS009	Binnie:2007developing	-116.952	34.1981	0.000283054	704	pa	0.37275	0.47124	0.391917	0.391917	0.441323	FALSE	0.140301	0.0682591	0.119338
S129WTS005	Nobile:2016ambato	-65.9994	-28.0951	0.0081875	873	mt	0.30848	0.08323	0.350939	0.350939	0.432779	FALSE	0.189007	0.104986	0.212122
S200WTS001	Cook:2018gongga	101.951	29.7611	0.00804583	2378	pa	0.50212	1.24001	0.551944	0.551944	0.693643	FALSE	0.412541	0.478583	0.49111
S081WTS014	Roller:2012rwenzori	29.9	0.217216	0.00924423	3894	mt	0.40928	0.09887	0.43892	0.43892	0.512947	FALSE	0.207192	0.26365	0.25251
S138WTS015	Molliex:2016mediterranean	9.07593	42.2476	0.00679861	1136	pa	0.53973	0.08338	0.58979	0.58979	0.658649	FALSE	0.232792	0.261743	0.257439
S260WTS006	He:2020weihe	109.823	34.3934	0.00757708	932	pa	0.48674	0.10404	0.558191	0.558191	0.664288	FALSE	0.135622	0.441686	0.158966
S207WTS002	Stutenbecker:2018rhone	7.885	46.368	0.00487431	1832	mt	0.59038	0.69994	0.643778	0.643778	0.695496	FALSE	0.411294	0.75333	0.51933
S111WTS023	Olen:2015arun	87.351	27.1441	0.0081664	1649	mt	0.39982	0.14714	0.409911	0.409911	0.459573	FALSE	0.243107	0.0901258	0.275495
S119WTS009	Glotzbach:2016kruger	31.9116	-24.9331	0.00827083	602	vb	0.02713	0.00299	0.0315325	0.0315325	0.0283791	FALSE	0.00506723	0.00315028	0.00509909
S015WTS027	Matmon:2003smoky	-83.1724	35.7132	0.00744768	1703	mt	0.34329	0.03237	0.39728	0.39728	0.46215	FALSE	0.118535	0.113227	0.104576
S077WTS001	Codilean:2014discordance	16.1831	-23.4031	0.00841398	282	pa	0.19185	0.01333	0.204735	0.204735	0.260536	FALSE	0.0501548	0.0563082	0.0467112
S115WTS028	Adams:2016bhutan	89.6471	27.7718	0.00811042	1186	mt	0.56445	0.35627	0.579037	0.579037	0.636657	FALSE	0.344757	0.433282	0.504287
S115WTS044	Adams:2016bhutan	90.3704	27.5075	0.00267083	2016	mt	0.29779	0.09049	0.309984	0.309984	0.375052	FALSE	0.132949	0.0682114	0.0985705
S092WTS016	Barreto:2013minas	-43.5368	-19.4563	0.00863677	2013	ss	0.16725	0.00289	0.172971	0.172971	0.207045	FALSE	0.0571517	0.0350333	0.0521421
S186WTS027	Portenga:2019potomac	-77.7877	38.6478	0.0022625	1137	vb	0.02507	0.00938	0.0381587	0.0381587	0.0436759	FALSE	0.00279115	0.00548464	0.00713703
S149WTS024	Gonzalez:2016panamanian	-79.0274	9.3468	0.00902153	2834	vb	0.16483	0.07645	0.18712	0.18712	0.246027	FALSE	0.0306623	0.0541871	0.0317131
S159WTS017	Acosta:201vegetation	36.8327	1.71493	0.00912361	544	mt	0.02219	0.00583	0.0281777	0.0281777	0.022857	FALSE	0.00570707	0.00241061	0.00539649
S069WTS001	Norton:2011alps	12.1807	47.0648	0.00413697	1601	mt	0.51552	1.25752	0.51439	0.51439	0.587252	FALSE	0.220043	0.547969	0.224767
S103WTS013	Godard:2014himalayan	83.7281	28.358	0.00802153	3678	mt	0.50152	0.54167	0.530547	0.530547	0.580224	FALSE	0.25531	0.291451	0.32893
S078WTS014	Hippe:2012altiplano	-67.6384	-17.3062	0.00869192	746	sm	0.14219	0.00506	0.160981	0.160981	0.187034	FALSE	0.0377645	0.0262393	0.0241318
S101WTS020	Munack:2014outpaced	78.5993	33.3308	0.00760561	447	pa	0.3908	0.01032	0.388401	0.388401	0.428498	FALSE	0.153062	0.0746999	0.138153
S186WTS039	Portenga:2019potomac	-78.9273	38.2601	0.00162639	997	ss	0.0345	0.00276	0.0515899	0.0515899	0.0628943	FALSE	0.00404664	0.00810351	0.00904024
S249WTS008	Heineke:2019menderes	27.5684	38.2738	0.00713829	864	mt	0.2788	0.05049	0.290653	0.290653	0.338589	FALSE	0.0823837	0.054872	0.0606624
S103WTS003	Godard:2014himalayan	84.9309	27.737	0.00804583	2863	pa	0.39622	0.17257	0.417189	0.417189	0.506464	FALSE	0.141815	0.127583	0.135033
S056WTS007	Meyer:2010black	8.21592	48.562	4.96225e-05	1911	ss	0.26405	0.04144	0.258272	0.258272	0.309618	FALSE	0.0586433	0.0396762	0.0326355
S179WTS003	DeLong:2017andreas	-123.561	38.9957	0.00697986	1436	ss	0.28819	0.11703	0.334456	0.334456	0.39909	FALSE	0.0642417	0.0928416	0.0631505
S121WTS029	Dixon:2016alps	15.3001	46.5343	0.00617431	1351	pa	0.27879	0.08525	0.300919	0.300919	0.353896	FALSE	0.0856926	0.0773509	0.069311
S271WTS017	Brocard:2021guatemala	-90.6375	14.9786	0.00856042	1266	mt	0.28007	0.03883	0.298951	0.298951	0.353512	FALSE	0.130281	0.0775977	0.125543
S092WTS009	Barreto:2013minas	-43.4737	-18.535	0.00850723	1489	ss	0.15495	0.00434	0.165501	0.165501	0.19964	FALSE	0.027801	0.0318128	0.0244139
S070WTS005	Palumbo:2010tibet	97.5821	39.3713	0.00689393	951	sm	0.4231	0.04283	0.430019	0.430019	0.490837	FALSE	0.134807	0.129093	0.106722
S253WTS028	Chen:2020morakot	120.787	22.2227	0.00747986	2617	ss	0.3119	0.13844	0.339246	0.339246	0.430823	TRUE	0.0801081	0.122397	0.072074
S101WTS006	Munack:2014outpaced	77.0397	34.2121	0.00735956	548	pb	0.5973	0.10489	0.626252	0.626252	0.713039	FALSE	0.280043	0.567195	0.334901
S261WTS042	Riley:2020staircase	-112.171	37.554	0.006975	354	ss	0.1856	0.08156	0.197443	0.197443	0.24296	FALSE	0.0370946	0.0937988	0.0353783
S096WTS001	Glotzbach:2013glacially	6.82888	45.5025	0.00623348	1969	mt	0.5144	1.27913	0.511754	0.511754	0.561353	TRUE	0.266808	0.486996	0.290488
S043WTS002	Codilean:2008spatially	16.3352	-23.4147	0.00808403	265	mt	0.20455	0.01278	0.235142	0.235142	0.307265	FALSE	0.0600956	0.0932735	0.0618804
S131WTS001	Siame:2015palo	-68.0325	-31.4065	0.00756528	271	mt	0.38171	0.05008	0.418088	0.418088	0.539661	FALSE	0.135916	0.146308	0.132746
S015WTS041	Matmon:2003smoky	-83.5564	35.5196	0.00716596	1731	mt	0.3245	0.01887	0.34409	0.34409	0.397917	FALSE	0.105624	0.0737504	0.0821308
S182WTS028	Schmidt:2016yunnan	100.948	23.8765	0.00804931	1392	ss	0.33585	0.09071	0.371394	0.371394	0.463546	FALSE	0.0865483	0.14849	0.0823738
S110WTS013	Ansberque:2015longriba	103.587	32.8979	0.00340625	948	ss	0.3724	0.16673	0.389874	0.389874	0.450807	FALSE	0.10606	0.10305	0.0842339
S218WTS009	Matmon:2018namibia	14.6176	-21.1324	0.00818264	128	pa	0.36123	0.00487	0.382302	0.382302	0.424773	FALSE	0.184105	0.101956	0.189911
S110WTS007	Ansberque:2015longriba	102.678	33.0207	0.00732292	1190	ss	0.228	0.0565	0.247452	0.247452	0.282569	FALSE	0.0426891	0.0557919	0.0349408
S271WTS028	Brocard:2021guatemala	-91.1835	15.5487	0.00667708	3047	mt	0.43861	0.06387	0.478584	0.478584	0.56389	FALSE	0.162919	0.209263	0.189807
S110WTS027	Ansberque:2015longriba	102.679	32.1065	0.00739653	1343	ss	0.5269	0.24515	0.554658	0.554658	0.625601	FALSE	0.218814	0.168415	0.225995
S115WTS031	Adams:2016bhutan	90.699	27.2661	0.00775903	2651	mt	0.61931	1.10467	0.655461	0.655461	0.690639	FALSE	0.340602	0.402208	0.476247
S186WTS033	Portenga:2019potomac	-77.7495	38.9101	0.00664028	1085	mt	0.0601	0.00644	0.0703081	0.0703081	0.0901123	FALSE	0.00822455	0.0110948	0.0114477
S101WTS023	Munack:2014outpaced	77.5129	34.2615	0.00720939	678	pa	0.4476	0.02237	0.451634	0.451634	0.503777	FALSE	0.183052	0.126123	0.16863
S106WTS020	LeRouxMallouf:2015bhutan	89.5431	26.9403	0.00427361	4382	mt	0.44255	0.98883	0.458379	0.458379	0.500738	FALSE	0.249495	0.164167	0.242955
S111WTS024	Olen:2015arun	87.3188	27.0844	0.00771432	1558	mt	0.40324	0.158	0.411062	0.411062	0.457759	FALSE	0.22929	0.066287	0.191164
S165WTS028	Cyr:2014distinguishing	16.7562	39.4018	0.00653056	1097	mt	0.25629	0.275325	0.305774	0.305774	0.371863	TRUE	0.0805905	0.0921658	0.0721037
S265WTS011	Kim:2020taebaek	128.969	37.2682	0.00688333	1713	sc	0.27613	0.02603	0.33559	0.33559	0.403672	FALSE	0.0512467	0.11209	0.0523188
S011WTS013	Bierman:2001background	-123.809	44.4913	0.00615735	2842	ss	0.2873	0.10494	0.322739	0.322739	0.400995	FALSE	0.0542195	0.122921	0.0578304
S225WTS002	Stolle:2018medieval	83.8732	28.2901	0.00181665	3314	mt	0.40488	0.51313	0.417347	0.417347	0.45537	FALSE	0.0961388	0.195035	0.0868535
S086WTS006	Godard:2012marsyandi	84.3698	28.1471	0.0076176	3455	mt	0.34594	0.29198	0.355461	0.355461	0.413444	FALSE	0.102172	0.103139	0.0811392
S050WTS045	Ouimet:2009threshold	100.994	32.4242	0.00729095	1074	ss	0.34004	0.13721	0.37795	0.37795	0.447776	FALSE	0.0872433	0.116252	0.0781123
S249WTS010	Heineke:2019menderes	27.8186	38.4029	0.0067617	780	mt	0.20859	0.10327	0.241153	0.241153	0.292587	FALSE	0.0718583	0.0680644	0.0718511
S110WTS020	Ansberque:2015longriba	103.774	32.0846	0.00726181	1446	sm	0.6309	0.45338	0.475519	0.475519	0.749885	FALSE	0.168483	0.526969	0.212374
S097WTS002	Buechi:2014nunatak	8.97103	47.3311	0.00021875	2034	sm	0.4205	0.35029	0.466555	0.466555	0.54377	FALSE	0.0721083	0.0624525	0.0565575
S050WTS029	Ouimet:2009threshold	100.917	30.0497	0.00736871	1308	ss	0.53353	0.08233	0.557872	0.557872	0.621387	FALSE	0.20597	0.154513	0.216477
S069WTS003	Norton:2011alps	10.6216	46.031	0.00586336	1826	sc	0.52337	0.45853	0.534927	0.534927	0.578635	FALSE	0.270769	0.259325	0.264961
S100WTS005	Dietsch:2014ladakh	77.6265	34.1911	6.16928e-05	457	pa	0.4779	0.00067	0.498089	0.498089	0.63458	FALSE	0.114215	0.159933	0.0921613
S111WTS026	Olen:2015arun	87.3773	27.5267	0.00753103	4242	mt	0.61581	0.48155	0.630084	0.630084	0.667846	FALSE	0.371447	0.464993	0.526323
S138WTS011	Molliex:2016mediterranean	9.28073	42.3689	0.00620903	1047	mt	0.33744	0.0671	0.373321	0.373321	0.428059	FALSE	0.122934	0.101634	0.096233
S098WTS001	Buscher:2013menderes	28.0289	38.3756	0.00663027	824	mt	0.32476	0.06543	0.334178	0.334178	0.386973	FALSE	0.121363	0.0936645	0.123106
S279WTS003	Heimsath:2020equilibrium	31.2318	-23.0398	3.88889e-05	485	mt	0.01602	0.00458	0.0219173	0.0219173	0.0196728	FALSE	0.0015609	0.000695014	0.00245752
S101WTS022	Munack:2014outpaced	78.6852	33.2947	0.00705528	448	pa	0.4117	0.01204	0.408087	0.408087	0.446986	FALSE	0.167217	0.0780522	0.143572
S119WTS006	Glotzbach:2016kruger	31.4104	-25.2842	0.00186389	704	pa	0.08321	0.0108	0.091481	0.091481	0.108707	FALSE	0.015472	0.0101205	0.01041
S164WTS063	Mandal:2015indian	75.7095	12.4758	0.00823333	3619	mt	0.14228	0.01891	0.179889	0.179889	0.232017	FALSE	0.0275257	0.0486197	0.0305745
S249WTS013	Heineke:2019menderes	27.6099	38.33	0.00660591	895	mt	0.36814	0.05001	0.371779	0.371779	0.4248	FALSE	0.112148	0.0710485	0.0866329
S118WTS004	Dirks:2016cradle	27.7304	-25.9259	0.00752708	692	ss	0.08026	0.00254	0.0913036	0.0913036	0.105086	FALSE	0.018942	0.011007	0.0128337
S264WTS001	Kim:2016korean	128.495	38.1632	0.00654931	1945	pa	0.35895	0.13128	0.416242	0.416242	0.505622	FALSE	0.112068	0.181034	0.103967
S151WTS023	Derrieux:2014taiwan	121.617	24.222	0.00547847	3892	mt	0.65824	1.531	0.656061	0.656061	0.784468	FALSE	0.357922	0.524266	0.468683
S194WTS006	Woelfler:2017menderes	28.1626	37.9972	0.0065568	764	mt	0.35052	0.08637	0.35711	0.35711	0.416014	FALSE	0.140748	0.0824435	0.117056
S130WTS013	Schildgen:2016argentina	-65.6014	-23.8233	0.00758472	1192	ss	0.33586	0.151298	0.352925	0.352925	0.394369	TRUE	0.186956	0.0519662	0.210804
S152WTS011	Foster:2016storm	-105.421	40.0311	5.69444e-05	488	pa	0.38983	0.03484	0.419524	0.419524	0.500554	FALSE	0.0670457	0.0788215	0.0591234
S183WTS018	Kim:2017seti	83.8937	28.4073	0.00730833	3935	mt	0.60506	0.41279	0.589502	0.589502	0.668501	FALSE	0.366449	0.255542	0.441166
S205WTS025	Fame:2018paraglacial	-5.96508	57.2524	0.000420139	2599	pa	0.16363	0.07229	0.167922	0.167922	0.18404	FALSE	0.0467741	0.0162622	0.0180346
S271WTS010	Brocard:2021guatemala	-90.2879	15.0437	0.00798611	1745	mt	0.23806	0.03017	0.253909	0.253909	0.308121	FALSE	0.0860989	0.0726592	0.0670746
S101WTS019	Munack:2014outpaced	77.3865	34.2763	0.0068294	616	pa	0.4952	0.02875	0.507925	0.507925	0.578414	TRUE	0.216173	0.187484	0.224316
S108WTS016	Portenga:2015bhutanese	89.9929	27.1758	0.00734236	3158	mt	0.45601	3.65792	0.482342	0.482342	0.548654	FALSE	0.261542	0.140929	0.324902
S275WTS005	Vermeesch:2018macedonia	21.9275	41.1495	0.00621458	836	mt	0.29458	0.10789	0.316833	0.316833	0.364778	FALSE	0.1062	0.0793898	0.0869215
S115WTS001	Adams:2016bhutan	90.6074	27.4157	0.00730417	2425	mt	0.52498	0.35354	0.549472	0.549472	0.611945	FALSE	0.309269	0.163139	0.399542
S046WTS042	Duxburry:2008shenandoah	-78.7856	38.1817	5.73273e-05	1100	mt	0.2308	0.00532	0.238537	0.238537	0.273733	FALSE	0.0480802	0.0327692	0.0260977
S019WTS004	Perg:2003cruz	-122.212	37.1105	0.00656088	888	ss	0.2269	0.0736	0.273428	0.273428	0.322027	FALSE	0.0674951	0.0974349	0.0610729
S062WTS007	Meyer:2008rhenish	8.46342	51.4255	0.00512117	1134	ss	0.0969	0.03727	0.111706	0.111706	0.124732	FALSE	0.0174226	0.0184779	0.0158113
S218WTS012	Matmon:2018namibia	14.5311	-21.2116	0.00764931	133	pa	0.24128	0.00305	0.265117	0.265117	0.292312	FALSE	0.115711	0.0768895	0.132625
S101WTS024	Munack:2014outpaced	77.2006	34.3644	0.00673709	650	pa	0.4579	0.03922	0.46061	0.46061	0.519981	FALSE	0.192926	0.149827	0.198943
S260WTS013	He:2020weihe	109.116	33.9423	0.00569167	1167	mt	0.52495	0.1427	0.569027	0.569027	0.693689	FALSE	0.179141	0.531011	0.202588
S249WTS025	Heineke:2019menderes	27.6645	38.0017	0.00641369	1000	mt	0.31274	0.30317	0.330209	0.330209	0.415398	FALSE	0.071573	0.118179	0.0642018
S268WTS009	Adams:2020climate	90.7232	27.0387	0.00609583	3374	mt	0.44733	0.32258	0.472137	0.472137	0.540431	FALSE	0.205432	0.133948	0.218024
S059WTS002	Abbuehl:2010peruvian	-79.9511	-4.90827	0.008086	1620	pa	0.3614	0.10887	0.381426	0.381426	0.461848	FALSE	0.19746	0.119202	0.191372
S186WTS023	Portenga:2019potomac	-77.2156	38.4603	0.00374653	1062	su	0.01827	0.00521	0.0371814	0.0371814	0.024467	FALSE	0.00224364	0.00951022	0.0102203
S164WTS051	Mandal:2015indian	76.6714	11.4483	0.00793194	1491	pa	0.19124	0.01117	0.225242	0.225242	0.263582	FALSE	0.106035	0.0524634	0.176382
S149WTS003	Gonzalez:2016panamanian	-79.5418	9.43739	0.00797847	3651	vb	0.20476	0.17089	0.222924	0.222924	0.292721	FALSE	0.041753	0.0852374	0.0411096
S205WTS003	Fame:2018paraglacial	-5.29471	57.1999	0.00438125	2946	mt	0.46232	0.16479	0.493129	0.493129	0.52541	FALSE	0.167718	0.229472	0.131468
S030WTS016	Vanacker:2007escarpment	80.7545	6.72092	7.14411e-05	2426	mt	0.44913	0.03091	0.447848	0.447848	0.573716	FALSE	0.196298	0.191097	0.145141
S015WTS028	Matmon:2003smoky	-83.1798	35.7103	0.00653783	1728	mt	0.37123	0.03146	0.401801	0.401801	0.468862	FALSE	0.113627	0.116989	0.0992433
S034WTS002	Binnie:2007developing	-116.939	34.0774	5.9478e-05	919	pa	0.51024	2.80038	0.535335	0.535335	0.614613	FALSE	0.17155	0.0775691	0.138711
S050WTS035	Ouimet:2009threshold	102.179	29.305	0.00702793	2307	vb	0.58021	0.14654	0.593864	0.593864	0.644991	FALSE	0.284319	0.444196	0.349903
S083WTS004	VandenBerg:2012entlebuch	8.0991	46.9129	0.00197708	2199	sc	0.361	0.18843	0.372492	0.372492	0.408622	FALSE	0.101732	0.0987042	0.0751572
S091WTS002	Lee:2013patagonian	-71.0629	-53.1338	0.00482017	942	ss	0.11434	0.42989	0.126053	0.126053	0.147235	FALSE	0.0419183	0.0179248	0.0261884
S218WTS014	Matmon:2018namibia	14.474	-21.1384	0.00744306	151	pa	0.32767	0.00345	0.347036	0.347036	0.408415	FALSE	0.154449	0.0916346	0.173362
S185WTS012	Salgado:2016relief	-44.6028	-22.688	0.0019	2005	mt	0.38141	0.02025	0.412524	0.412524	0.473571	FALSE	0.184313	0.0955575	0.152263
S108WTS044	Portenga:2015bhutanese	89.8527	27.3102	0.00705069	2114	mt	0.47884	0.84644	0.497908	0.497908	0.559234	FALSE	0.286949	0.213863	0.445628
S138WTS005	Molliex:2016mediterranean	8.94931	42.4193	0.00585417	1116	va	0.50616	0.01702	0.554948	0.554948	0.609244	FALSE	0.213841	0.353354	0.212771
S163WTS015	Glotzbach:2013glaciation	8.06724	47.9212	0.00527847	1656	mt	0.24428	0.08683	0.264169	0.264169	0.286296	FALSE	0.07616	0.0586307	0.0723448
S200WTS016	Cook:2018gongga	102.016	30.0367	0.00121528	1540	pa	0.69911	0.63575	0.766534	0.766534	0.798571	FALSE	0.528882	0.389561	0.756502
S207WTS013	Stutenbecker:2018rhone	7.93109	46.366	0.00279722	1828	mt	0.71646	0.25325	0.780312	0.780312	0.834623	FALSE	0.470499	0.919393	0.512037
S161WTS002	Vanacker:2015transient	-78.7604	-3.19817	0.0078625	1616	py	0.4835	0.06201	0.502508	0.502508	0.574547	FALSE	0.270504	0.155428	0.281039
S151WTS024	Derrieux:2014taiwan	121.387	23.9496	0.00717917	3276	mt	0.53852	2.53551	0.564392	0.564392	0.631901	FALSE	0.222773	0.447977	0.305235
S115WTS009	Adams:2016bhutan	90.9536	27.6231	0.00529097	2355	mt	0.30605	0.06494	0.329297	0.329297	0.394506	FALSE	0.128579	0.0722047	0.106977
S077WTS002	Codilean:2014discordance	16.1654	-23.5689	0.00719238	287	mt	0.1958	0.01358	0.218163	0.218163	0.301697	FALSE	0.0491697	0.0798644	0.0524317
S167WTS007	Matsushi:2014yield	137.783	36.4004	5.76389e-05	2423	pa	0.58918	1.25177	0.630605	0.630605	0.749404	FALSE	0.153502	0.353515	0.152191
S271WTS029	Brocard:2021guatemala	-91.1293	15.4218	0.00754028	2968	su	0.30598	0.21549	0.33097	0.33097	0.391307	FALSE	0.111303	0.122068	0.107689
S037WTS017	Wittmann:2007switzerland	8.58809	46.4298	0.00538604	2740	mt	0.58115	0.29251	0.573631	0.573631	0.625597	FALSE	0.307304	0.618725	0.332469
S195WTS002	Morell:2017strain	79.1562	30.4887	0.00671763	2592	mt	0.47622	0.31927	0.48918	0.48918	0.534457	FALSE	0.247493	0.158306	0.247468
S226WTS027	Tofelde:2018hillslope	-65.9479	-24.5694	0.00701389	808	mt	0.39047	0.0236325	0.410016	0.410016	0.469313	TRUE	0.157363	0.0876256	0.159136
S015WTS033	Matmon:2003smoky	-83.4765	35.6402	0.00633388	1632	ss	0.36611	0.02974	0.390027	0.390027	0.46302	FALSE	0.117476	0.120195	0.100849
S106WTS021	LeRouxMallouf:2015bhutan	89.5619	26.9684	0.00150903	4106	mt	0.46709	0.37782	0.452458	0.452458	0.506628	FALSE	0.326636	0.10136	0.379205
S077WTS007	Codilean:2014discordance	16.4696	-23.2708	0.00715718	263	pa	0.03926	0.00544	0.0464739	0.0464739	0.0533331	FALSE	0.00542426	0.00489701	0.0075222
S271WTS021	Brocard:2021guatemala	-90.6844	15.0706	0.000732639	1824	mt	0.28436	0.06846	0.310798	0.310798	0.393131	FALSE	0.111726	0.0918883	0.100285
S101WTS001	Munack:2014outpaced	76.6974	34.5521	0.00640452	480	pa	0.5123	0.05656	0.528295	0.528295	0.605431	FALSE	0.231758	0.23339	0.285293
S022WTS017	Nichols:2005chagres	-79.352	9.2862	0.00764288	3233	pa	0.23698	0.12057	0.258089	0.258089	0.326499	FALSE	0.0600982	0.0666058	0.0481188
S097WTS008	Buechi:2014nunatak	9.00147	47.3612	0.00272847	1788	sm	0.2605	0.2514	0.278222	0.278222	0.322491	FALSE	0.0399744	0.0623013	0.0366053
S081WTS017	Roller:2012rwenzori	29.953	0.267902	0.00773081	3822	mt	0.43342	0.12281	0.454763	0.454763	0.511425	FALSE	0.235039	0.251609	0.303441
S104WTS012	Scherler:2013garhwal	78.0447	30.9522	0.00344028	1466	sm	0.4409	0.12346	0.485231	0.485231	0.569018	FALSE	0.106119	0.231637	0.108995
S057WTS005	Delunel:2010pelvoux	6.40532	44.92	0.00545857	1901	mt	0.69367	0.94993	0.598427	0.598427	0.741247	FALSE	0.347341	0.828935	0.389746
S108WTS012	Portenga:2015bhutanese	90.2562	27.1886	0.00685486	3368	ss	0.58315	0.60556	0.612791	0.612791	0.654473	FALSE	0.307015	0.28049	0.378111
S172WTS013	Grischott:2016alpine	9.75539	46.3722	0.00199375	1844	mt	0.52635	0.620407	0.571308	0.571308	0.597117	TRUE	0.269674	0.42729	0.263699
S050WTS033	Ouimet:2009threshold	102.005	29.6352	0.00667975	2706	sm	0.55315	2.44132	0.558632	0.558632	0.63127	FALSE	0.447534	0.399696	0.823995
S192WTS021	Arkle:2017trinidad	-61.2002	10.7639	0.00393472	2504	mt	0.23277	0.04678	0.282006	0.282006	0.370088	FALSE	0.0555334	0.0926091	0.0513939
S092WTS015	Barreto:2013minas	-43.5287	-19.46	0.00721984	2026	ss	0.15553	0.00223	0.160588	0.160588	0.193074	FALSE	0.0503714	0.0308894	0.0494695
S186WTS030	Portenga:2019potomac	-77.355	38.8135	0.00464861	1091	ss	0.03492	0.00377	0.0527595	0.0527595	0.0554938	FALSE	0.00538415	0.0100904	0.0106819
S249WTS029	Heineke:2019menderes	27.8803	37.9571	0.00601649	957	mt	0.46794	0.38595	0.479549	0.479549	0.561666	FALSE	0.158017	0.184214	0.144659
S110WTS025	Ansberque:2015longriba	103.254	32.8045	0.00640556	1176	ss	0.3066	0.25182	0.328711	0.328711	0.397927	FALSE	0.0760339	0.100197	0.0607745
S213WTS008	Neely:2019california	-117.632	34.212	0.000104861	693	mt	0.58168	0.23134	0.622903	0.622903	0.715418	FALSE	0.187874	0.0728501	0.184526
S111WTS013	Olen:2015arun	87.0724	27.3454	0.00675985	2569	sm	0.43982	0.36498	0.455687	0.455687	0.513852	FALSE	0.237877	0.111851	0.247629
S268WTS014	Adams:2020climate	90.973	26.9528	0.00678194	2834	sm	0.5397	0.65915	0.56593	0.56593	0.654837	FALSE	0.192322	0.275953	0.21539
S165WTS005	Cyr:2014distinguishing	11.5435	44.049	0.00542847	1183	sc	0.30661	0.301945	0.366885	0.366885	0.446116	TRUE	0.0743748	0.149618	0.0690648
S043WTS004	Codilean:2008spatially	16.2967	-23.3447	0.00690556	336	pa	0.09025	0.00794	0.0949568	0.0949568	0.109875	FALSE	0.0152213	0.0143154	0.0146572
S260WTS021	He:2020weihe	108.271	33.9753	0.00623125	934	mt	0.5164	0.31766	0.580376	0.580376	0.704436	FALSE	0.162511	0.432411	0.179477
S019WTS003	Perg:2003cruz	-122.24	37.1698	0.0060027	854	ss	0.2433	0.21787	0.266431	0.266431	0.314112	FALSE	0.0579017	0.0889538	0.0533304
S101WTS029	Munack:2014outpaced	77.492	34.0039	0.00623986	520	sm	0.4567	0.06704	0.487287	0.487287	0.564609	FALSE	0.181014	0.348605	0.191322
S070WTS011	Palumbo:2010tibet	99.4655	38.8679	0.00584918	815	sc	0.5283	0.09514	0.559188	0.559188	0.643808	FALSE	0.193808	0.259161	0.208882
S249WTS003	Heineke:2019menderes	27.9211	38.3089	0.00587555	848	mt	0.30829	0.1903	0.323335	0.323335	0.388636	FALSE	0.0989552	0.0796366	0.081768
S186WTS002	Portenga:2019potomac	-77.0322	39.1084	0.00579375	1172	mt	0.03164	0.0164	0.0478849	0.0478849	0.0556286	FALSE	0.00471969	0.00978086	0.0101934
S149WTS001	Gonzalez:2016panamanian	-80.1898	8.52826	0.00737222	2664	vi	0.1113	0.11784	0.124998	0.124998	0.166377	FALSE	0.027099	0.0538655	0.0248597
S115WTS024	Adams:2016bhutan	91.1863	27.7862	0.00655764	2225	mt	0.5258	0.10634	0.547006	0.547006	0.591224	FALSE	0.281711	0.281842	0.405118
S194WTS001	Woelfler:2017menderes	28.0783	38.1928	5.58348e-05	668	mt	0.19221	0.04684	0.2072	0.2072	0.267261	FALSE	0.0238882	0.039867	0.0202134
S194WTS008	Woelfler:2017menderes	27.9959	38.0155	0.00585966	830	mt	0.38839	0.13683	0.392511	0.392511	0.454762	FALSE	0.12629	0.0954838	0.102142
S110WTS029	Ansberque:2015longriba	103.263	32.1894	0.00628125	1121	ss	0.5145	0.21254	0.544511	0.544511	0.606186	FALSE	0.213284	0.182399	0.227547
S276WTS003	Vanacker:2020tropical	-78.8698	-1.80177	0.00739792	2200	sm	0.36727	1.35916	0.388732	0.388732	0.449987	FALSE	0.151387	0.107431	0.140675
S087WTS003	Scharf:2013strong	21.4121	-33.383	0.0061684	349	ss	0.3931	0.00324	0.413273	0.413273	0.490761	FALSE	0.134794	0.357004	0.145489
S139WTS018	Olivetti:2016massif	4.67284	44.9392	0.00118472	1269	mt	0.09244	0.02667	0.104945	0.104945	0.117331	FALSE	0.0137956	0.0204662	0.0159293
S108WTS001	Portenga:2015bhutanese	89.5199	28.0327	0.00650486	764	mt	0.51299	1.74057	0.505654	0.505654	0.567829	FALSE	0.238078	0.298304	0.241689
S205WTS007	Fame:2018paraglacial	-5.04663	57.1897	0.00398542	2815	mt	0.31007	0.17044	0.326811	0.326811	0.357007	FALSE	0.0875687	0.0871104	0.0547301
S262WTS002	Bender:2018yukon	-141.657	64.242	0.00319583	453	mt	0.26983	0.01656	0.307709	0.307709	0.314337	FALSE	0.084199	0.656502	0.113311
S105WTS001	Kai:2015qilian	100.25	38.5026	0.00575069	652	sm	0.4349	0.22233	0.469747	0.469747	0.5613	FALSE	0.136079	0.189338	0.130144
S165WTS017	Cyr:2014distinguishing	16.5852	39.0884	0.00567639	1355	mt	0.22068	0.65102	0.256033	0.256033	0.293486	FALSE	0.0846601	0.0644557	0.130157
S260WTS010	He:2020weihe	109.572	34.1119	0.00603403	945	pa	0.38093	0.09685	0.42981	0.42981	0.580847	FALSE	0.100823	0.229201	0.109233
S081WTS008	Roller:2012rwenzori	30.0227	0.554268	0.00730909	2762	mt	0.37014	0.04346	0.398223	0.398223	0.48074	FALSE	0.193863	0.106494	0.228894
S186WTS025	Portenga:2019potomac	-77.56	38.4608	0.0017625	1124	mt	0.02774	0.00938	0.0470299	0.0470299	0.0557645	FALSE	0.00255402	0.00940819	0.00957216
S110WTS028	Ansberque:2015longriba	103.108	32.008	0.00617083	1337	sm	0.5874	0.28389	0.615562	0.615562	0.678435	FALSE	0.294315	0.195522	0.336635
S135WTS017	Struth:2016colombia	-73.4969	5.4441	0.00720833	1275	sm	0.14981	0.00477	0.160277	0.160277	0.196879	FALSE	0.0449661	0.0306167	0.0296115
S176WTS002	Delunel:2013etages	6.25904	44.9067	0.00158194	1996	pa	0.742	0.91207	0.605713	0.605713	0.749014	FALSE	0.432718	0.453313	0.371853
S071WTS039	Henck:2011three	97.3118	30.1129	0.00616382	744	sm	0.544	0.09336	0.549937	0.549937	0.601578	FALSE	0.273848	0.231911	0.328397
S015WTS043	Matmon:2003smoky	-83.7572	35.5278	0.00573093	1782	mt	0.30263	0.01807	0.325741	0.325741	0.387066	FALSE	0.0869275	0.0836799	0.0674523
S163WTS004	Glotzbach:2013glaciation	8.00977	47.9171	8.40278e-05	1645	mt	0.372	0.10402	0.413131	0.413131	0.472305	FALSE	0.162485	0.0568331	0.124949
S077WTS004	Codilean:2014discordance	16.3204	-23.534	0.00652777	283	mt	0.23021	0.01279	0.255229	0.255229	0.343672	FALSE	0.0596311	0.0897692	0.0694709
S092WTS018	Barreto:2013minas	-43.5369	-19.3571	0.00671735	1855	ss	0.19205	0.00336	0.205482	0.205482	0.245334	FALSE	0.0668305	0.0451869	0.0550358
S192WTS027	Arkle:2017trinidad	-61.3227	10.6887	0.00216667	2165	mt	0.27266	0.03466	0.319882	0.319882	0.386067	FALSE	0.0604871	0.0833326	0.0502517
S070WTS009	Palumbo:2010tibet	99.218	39.0453	0.00552893	759	ss	0.5374	0.46707	0.561436	0.561436	0.65722	FALSE	0.204671	0.206012	0.211331
S224WTS014	Young:2018lucia	-121.555	36.0913	0.00572153	1044	pi	0.40602	0.15948	0.413686	0.413686	0.497462	FALSE	0.140511	0.140555	0.141665
S185WTS010	Salgado:2016relief	-44.7828	-22.8999	0.00129306	1850	pa	0.22472	0.00957	0.273872	0.273872	0.34736	FALSE	0.0429482	0.0861578	0.0441428
S101WTS028	Munack:2014outpaced	77.49	34.0012	0.00585618	530	sm	0.4536	0.07902	0.484529	0.484529	0.560756	FALSE	0.182138	0.333922	0.193061
S164WTS012	Mandal:2015indian	76.0829	11.4354	0.00692014	4109	pa	0.35017	0.04983	0.391761	0.391761	0.46543	FALSE	0.16726	0.265982	0.155045
S092WTS012	Barreto:2013minas	-43.6541	-18.2281	0.00666786	1460	ss	0.09102	0.003	0.099054	0.099054	0.117814	FALSE	0.0232417	0.0119497	0.015136
S149WTS015	Gonzalez:2016panamanian	-82.2512	8.95521	0.00202639	2941	va	0.3053	0.08557	0.323452	0.323452	0.379893	FALSE	0.118618	0.0751615	0.0868875
S261WTS010	Riley:2020staircase	-112.444	37.3618	0.00555347	425	ss	0.14222	0.09417	0.144721	0.144721	0.183193	FALSE	0.0305729	0.0302335	0.0232246
S050WTS067	Ouimet:2009threshold	101.793	31.0206	0.00594785	1324	mt	0.60402	0.29802	0.607477	0.607477	0.682113	FALSE	0.342064	0.376709	0.461006
S081WTS013	Roller:2012rwenzori	30.0467	0.277855	0.00697745	2606	mt	0.30997	0.03677	0.33544	0.33544	0.415775	FALSE	0.136577	0.101298	0.149769
S018WTS001	Morel:2003wutach	8.15506	47.8675	0.00465184	1647	pa	0.2018	0.09612	0.198982	0.198982	0.215988	FALSE	0.0364677	0.0341842	0.0290892
S279WTS016	Heimsath:2020equilibrium	31.2904	-25.2176	0.00625208	761	pa	0.04873	0.0037625	0.0519299	0.0519299	0.0554429	TRUE	0.00923657	0.00294564	0.00616587
S156WTS024	Reusser:2015landscape	-83.7904	34.7769	0.00489931	1863	mt	0.23214	0.01471	0.257922	0.257922	0.310974	FALSE	0.0500844	0.0677454	0.0434486
S014WTS023	Clapp:2002arid	-114.509	33.2224	0.00575733	114	va	0.17202	0.0206407	0.14158	0.14158	0.213254	TRUE	0.0154966	0.0701221	0.0251828
S015WTS010	Matmon:2003smoky	-83.2675	35.6382	0.00556182	1709	mt	0.33826	0.01818	0.336962	0.336962	0.388639	FALSE	0.0861807	0.0925362	0.0879742
S103WTS011	Godard:2014himalayan	84.1812	28.046	0.00599583	2810	sm	0.32405	0.09292	0.359245	0.359245	0.460472	FALSE	0.069799	0.171021	0.0714833
S164WTS070	Mandal:2015indian	76.7141	10.9432	0.00665625	1581	mt	0.2572	0.0391	0.28181	0.28181	0.293837	FALSE	0.128408	0.0712375	0.100169
S159WTS013	Acosta:201vegetation	35.5939	0.435488	0.000670139	1206	vi	0.2917	0.03241	0.305487	0.305487	0.339446	FALSE	0.171831	0.0479107	0.130686
S164WTS027	Mandal:2015indian	75.6349	12.4523	0.00672014	3858	mt	0.26334	0.04763	0.295074	0.295074	0.352819	FALSE	0.102046	0.0684926	0.0737897
S101WTS025	Munack:2014outpaced	78.234	33.3318	0.00571373	456	mt	0.3805	0.03093	0.384973	0.384973	0.41553	FALSE	0.213918	0.0774851	0.216535
S207WTS009	Stutenbecker:2018rhone	8.41261	46.5211	0.00463403	2602	mt	0.50044	1.07658	0.545394	0.545394	0.585712	FALSE	0.235575	0.382022	0.266819
S072WTS013	Dortch:2011ladakh	77.3418	34.3353	0.00564101	724	pa	0.4601	0.02664	0.463622	0.463622	0.512356	FALSE	0.19764	0.101618	0.188248
S253WTS018	Chen:2020morakot	120.7	22.5793	0.00621667	2946	ss	0.5361	0.56852	0.542041	0.542041	0.607865	FALSE	0.245155	0.207234	0.269755
S201WTS007	Heineke:2017reservoir	27.8301	37.9797	0.00536438	995	mt	0.37835	0.15659	0.394438	0.394438	0.465755	FALSE	0.136728	0.113059	0.123993
S179WTS009	DeLong:2017andreas	-123.223	38.5871	0.00531458	1440	mt	0.21231	0.16138	0.257709	0.257709	0.318183	FALSE	0.0404838	0.0757468	0.0408759
S069WTS036	Norton:2011alps	11.4735	46.2302	0.00274433	1332	va	0.50316	0.17001	0.505286	0.505286	0.562845	FALSE	0.183889	0.278834	0.180585
S050WTS049	Ouimet:2009threshold	101.346	30.2988	0.00586207	1325	ss	0.12354	0.04045	0.127978	0.127978	0.114556	FALSE	0.0368837	0.0165489	0.0205223
S139WTS006	Olivetti:2016massif	4.44222	45.2785	0.00277292	1096	pa	0.13586	0.027	0.146363	0.146363	0.150175	FALSE	0.0338024	0.019569	0.0222255
S249WTS018	Heineke:2019menderes	27.7107	38.311	0.00531012	825	mt	0.30873	0.10263	0.313295	0.313295	0.357794	FALSE	0.112174	0.0486725	0.0788365
S115WTS043	Adams:2016bhutan	91.6923	27.3012	0.0060125	2698	mt	0.49222	1.31478	0.503472	0.503472	0.538972	FALSE	0.29893	0.151407	0.336996
S083WTS009	VandenBerg:2012entlebuch	8.10746	46.9071	0.000919444	2282	sc	0.3252	0.18812	0.333214	0.333214	0.358314	FALSE	0.111106	0.0610517	0.078467
S050WTS061	Ouimet:2009threshold	101.47	28.9363	0.00591715	1393	ss	0.49216	0.3208	0.513344	0.513344	0.563309	FALSE	0.232287	0.151495	0.269368
S115WTS008	Adams:2016bhutan	90.831	27.6565	0.00596528	1962	sm	0.40401	0.06625	0.419246	0.419246	0.501319	FALSE	0.158544	0.122862	0.133281
S089WTS013	Gudmundsdottir:2013cruz	-122.248	37.3268	0.005306	866	ss	0.2091	0.26605	0.230824	0.230824	0.279835	FALSE	0.051712	0.0673069	0.0420394
S261WTS012	Riley:2020staircase	-112.428	37.4639	0.00529306	483	ss	0.23269	0.43914	0.238513	0.238513	0.31333	FALSE	0.0403935	0.112815	0.0386332
S149WTS030	Gonzalez:2016panamanian	-79.9023	8.67928	0.00132917	2464	va	0.27228	0.01827	0.284236	0.284236	0.340595	FALSE	0.0872838	0.0817763	0.0627622
S050WTS031	Ouimet:2009threshold	101.635	30.0176	0.00576361	938	ss	0.3961	0.03845	0.403161	0.403161	0.454977	FALSE	0.0869652	0.102828	0.0762263
S260WTS023	He:2020weihe	107.979	34.0408	0.005425	1045	pa	0.5048	0.16728	0.563513	0.563513	0.680542	FALSE	0.157561	0.374474	0.171697
S078WTS017	Hippe:2012altiplano	-67.4325	-17.2842	0.00634256	1067	sm	0.07337	0.0037	0.0865485	0.0865485	0.0963027	FALSE	0.0161428	0.0112051	0.0128618
S092WTS023	Barreto:2013minas	-43.5614	-18.6294	0.00627821	1645	ss	0.1177	0.00355	0.12775	0.12775	0.158078	FALSE	0.020262	0.020648	0.0214616
S186WTS061	Portenga:2019potomac	-77.0227	39.5704	0.0035875	1071	vb	0.05805	0.01293	0.0782571	0.0782571	0.0895615	FALSE	0.00706317	0.0132068	0.0118456
S115WTS022	Adams:2016bhutan	90.0513	27.3372	0.00587847	2033	pa	0.55473	0.4387	0.563694	0.563694	0.766053	TRUE	0.312712	0.334947	0.289825
S271WTS026	Brocard:2021guatemala	-90.9854	15.162	0.00633056	1855	mt	0.29044	0.04942	0.313078	0.313078	0.397037	FALSE	0.0814172	0.0941986	0.0679673
S218WTS008	Matmon:2018namibia	15.2144	-21.0126	0.00617361	194	pa	0.02614	0.00248	0.0361006	0.0361006	0.0320284	FALSE	0.00514353	0.00643812	0.00611601
S262WTS007	Bender:2018yukon	-141.707	64.0369	0.00289306	478	mt	0.23882	0.01453	0.270066	0.270066	0.268804	FALSE	0.0771914	0.503	0.0941486
S044WTS015	Norton:2008swiss	7.90871	46.9771	0.00447916	1873	sm	0.28907	0.38361	0.32729	0.32729	0.398168	FALSE	0.0510879	0.131134	0.0521423
S213WTS020	Neely:2019california	-116.644	33.8265	0.000125694	489	pa	0.69067	0.68478	0.763927	0.763927	0.889815	FALSE	0.331693	0.166983	0.390212
S037WTS030	Wittmann:2007switzerland	7.26296	46.8337	0.00448787	1349	sm	0.10304	0.13627	0.115728	0.115728	0.13967	FALSE	0.0177378	0.0302858	0.0189833
S193WTS002	Wang:2017wenchuan	104.056	31.5259	0.00498264	2013	pa	0.57053	1.16969	0.512486	0.512486	0.614923	TRUE	0.277012	0.358413	0.270803
S225WTS005	Stolle:2018medieval	83.8495	28.2463	0.00574022	3706	mt	0.37083	0.3439	0.386355	0.386355	0.430309	FALSE	0.161337	0.106606	0.131769
S164WTS050	Mandal:2015indian	76.5416	11.6398	0.00637153	1512	mt	0.07155	0.00981	0.0855874	0.0855874	0.0929514	FALSE	0.00962752	0.00985826	0.010817
S165WTS016	Cyr:2014distinguishing	16.5171	39.1005	0.00500764	1363	mt	0.21835	0.4364	0.253833	0.253833	0.305168	FALSE	0.0749185	0.0691338	0.0820308
S161WTS028	Vanacker:2015transient	-78.7049	-2.94622	0.00649583	1408	mt	0.33632	0.0547826	0.349247	0.349247	0.402155	TRUE	0.136175	0.0881053	0.134875
S164WTS029	Mandal:2015indian	75.4559	12.4269	0.00445556	5621	pa	0.28631	0.03496	0.316546	0.316546	0.382403	FALSE	0.114207	0.0686743	0.08528
S064WTS009	Godard:2010regressive	103.939	31.3136	0.00553972	1678	ss	0.4005	0.1772	0.428042	0.428042	0.506779	FALSE	0.142621	0.16436	0.12533
S165WTS032	Cyr:2014distinguishing	16.5239	39.4557	0.00498958	1120	pa	0.17837	0.14177	0.216296	0.216296	0.26502	FALSE	0.047762	0.062751	0.0509859
S108WTS030	Portenga:2015bhutanese	89.9502	27.9736	0.00178194	1435	mt	0.46487	0.36161	0.493368	0.493368	0.567929	FALSE	0.257261	0.268611	0.341239
S050WTS048	Ouimet:2009threshold	101.137	31.0746	0.00551053	933	sm	0.44424	0.18633	0.467624	0.467624	0.525144	FALSE	0.162753	0.105875	0.158872
S200WTS014	Cook:2018gongga	101.794	30.1652	0.00393819	1365	pa	0.24168	0.15803	0.255038	0.255038	0.28465	FALSE	0.115155	0.0351086	0.0692724
S260WTS009	He:2020weihe	109.604	34.2284	0.00531944	878	pa	0.38911	0.10917	0.441316	0.441316	0.597185	FALSE	0.10672	0.229904	0.102592
S099WTS009	Kirby:2013kunlun	101.251	33.8349	0.00533554	929	su	0.33616	0.07227	0.349745	0.349745	0.404519	FALSE	0.0875426	0.0791229	0.0664847
S133WTS002	Gonzalez:2016background	-43.0174	-22.5037	0.000605556	2329	pa	0.42751	0.0546275	0.407484	0.407484	0.53746	TRUE	0.115637	0.247182	0.0957773
S261WTS033	Riley:2020staircase	-112.267	37.4022	0.00509306	418	ss	0.1853	0.19513	0.19856	0.19856	0.238064	FALSE	0.04589	0.0600826	0.0351442
S261WTS011	Riley:2020staircase	-112.487	37.1068	0.00510556	344	ss	0.10355	0.11208	0.127384	0.127384	0.152278	FALSE	0.0254648	0.03343	0.0227562
S015WTS009	Matmon:2003smoky	-83.2154	35.6368	0.00515854	1745	mt	0.42078	0.02346	0.386862	0.386862	0.443676	FALSE	0.117376	0.0923186	0.0928772
S063WTS010	Cyr:2010italy	15.3674	38.0447	0.00503277	963	mt	0.39651	0.885025	0.430037	0.430037	0.531817	TRUE	0.115625	0.158807	0.106739
S182WTS012	Schmidt:2016yunnan	99.3558	27.0734	0.00568542	1249	sm	0.32082	0.04376	0.362616	0.362616	0.481132	FALSE	0.0993786	0.134047	0.0903484
S119WTS004	Glotzbach:2016kruger	31.2222	-25.1445	0.00121528	872	pa	0.06025	0.00375	0.0653394	0.0653394	0.0717306	FALSE	0.011452	0.0031752	0.00691712
S082WTS001	Bookhagen:2012andes	-65.664	-24.7538	0.00579494	1382	mt	0.47852	0.19361	0.497095	0.497095	0.58158	FALSE	0.23845	0.135905	0.253785
S055WTS034	DiBiase:2010gabriel	-117.711	34.3443	0.00526115	631	mt	0.48339	0.90408	0.501218	0.501218	0.581138	FALSE	0.186562	0.157357	0.177645
S163WTS013	Glotzbach:2013glaciation	7.93983	47.8954	0.00424514	1980	mt	0.33192	0.0768	0.345891	0.345891	0.370991	FALSE	0.120016	0.0640604	0.0990582
S167WTS006	Matsushi:2014yield	137.771	36.4121	2.70833e-05	2586	pa	0.66038	0.51929	0.653611	0.653611	0.824789	FALSE	0.200959	0.251799	0.169652
S089WTS011	Gudmundsdottir:2013cruz	-122.409	37.5116	0.00499942	812	pa	0.2368	0.1036	0.261644	0.261644	0.316491	FALSE	0.0443801	0.0858518	0.0443131
S139WTS005	Olivetti:2016massif	4.55682	45.3444	0.0031875	1091	pa	0.23151	0.03616	0.247383	0.247383	0.264261	FALSE	0.0778893	0.033916	0.0527995
S167WTS001	Matsushi:2014yield	137.812	36.3982	2.70833e-05	1957	pa	0.35386	0.23082	0.368324	0.368324	0.516765	FALSE	0.0652173	0.100797	0.0451211
S015WTS021	Matmon:2003smoky	-83.3225	35.6145	0.00511357	1608	mt	0.37263	0.03545	0.400435	0.400435	0.480177	FALSE	0.106356	0.125097	0.0881032
S128WTS002	McPhillips:2013cordillera	-75.5861	-13.4768	0.00611319	638	sc	0.3252	0.05281	0.377946	0.377946	0.43776	FALSE	0.140837	0.15853	0.159805
S183WTS017	Kim:2017seti	83.8911	28.4178	0.00550139	4008	mt	0.62617	0.31624	0.598274	0.598274	0.689421	FALSE	0.392497	0.274708	0.483882
S138WTS002	Molliex:2016mediterranean	9.12144	42.5525	0.00456806	734	vb	0.21998	0.03644	0.265624	0.265624	0.33203	FALSE	0.0429538	0.0822404	0.0424035
S104WTS008	Scherler:2013garhwal	78.2986	30.9374	0.005275	2221	sc	0.6249	1.1225	0.648956	0.648956	0.693623	FALSE	0.315755	0.569453	0.365861
S021WTS011	vonBlanckenburg:2004tropical	80.7807	7.05121	0.00607445	2140	mt	0.35975	0.02475	0.378272	0.378272	0.432374	FALSE	0.18422	0.134507	0.170358
S130WTS021	Schildgen:2016argentina	-65.3544	-23.6388	0.00360833	1175	ss	0.3329	0.0484525	0.357452	0.357452	0.413812	TRUE	0.191191	0.0577663	0.162078
S025WTS044	Safran:2005bolivian	-67.4732	-16.4813	0.00581912	1561	sm	0.4502	0.10711	0.470702	0.470702	0.530549	FALSE	0.198187	0.119801	0.190407
S181WTS012	Rossi:2017baja	-115.408	31.0248	0.00498542	307	pa	0.59231	0.15447	0.67557	0.67557	0.777717	FALSE	0.274036	0.712107	0.328527
S201WTS010	Heineke:2017reservoir	28.3704	38.1824	0.0047638	760	mt	0.18257	0.067495	0.203102	0.203102	0.264503	TRUE	0.0580172	0.0484648	0.04532
S139WTS004	Olivetti:2016massif	4.50324	45.2703	0.00423819	1119	pa	0.24318	0.03474	0.252641	0.252641	0.272827	FALSE	0.0896388	0.0322503	0.0570228
S121WTS020	Dixon:2016alps	14.3611	47.4488	0.00392917	1543	mt	0.51541	0.19887	0.52072	0.52072	0.574532	FALSE	0.197283	0.221351	0.169339
S283WTS016	Delunel:2020alps	8.10778	46.8443	0.00409985	2121	sc	0.30437	0.641447	0.331787	0.331787	0.367839	TRUE	0.14809	0.09355	0.136305
S165WTS021	Cyr:2014distinguishing	16.6897	39.0553	0.00464722	1346	mt	0.22807	0.16483	0.270521	0.270521	0.321567	FALSE	0.0893576	0.0690231	0.0840934
S092WTS017	Barreto:2013minas	-43.5296	-19.3591	0.00563208	1886	ss	0.18071	0.0031	0.195966	0.195966	0.235221	FALSE	0.0665726	0.0437133	0.0568282
S149WTS009	Gonzalez:2016panamanian	-82.5788	8.87301	0.00584306	4280	va	0.29397	0.2278	0.314266	0.314266	0.383875	FALSE	0.104005	0.125727	0.0802082
S186WTS011	Portenga:2019potomac	-77.4857	39.5891	0.00155417	1325	vb	0.1245	0.01329	0.137867	0.137867	0.147017	FALSE	0.035011	0.0140018	0.0215172
S092WTS021	Barreto:2013minas	-43.5403	-19.2067	0.00557063	1972	mt	0.10276	0.00203	0.11176	0.11176	0.138258	FALSE	0.0191947	0.0177647	0.0237424
S279WTS013	Heimsath:2020equilibrium	31.2806	-25.2074	2.91667e-05	758	pa	0.04474	0.00287	0.0446418	0.0446418	0.0504191	FALSE	0.00683634	0.00130601	0.00345347
S269WTS010	Bellingham:2020ohau	169.991	-44.0359	0.00422342	2739	sm	0.53589	2.08444	0.540266	0.540266	0.595277	FALSE	0.242124	0.141528	0.220206
S002WTS003	Heimsath:1997soil	-122.55	37.8648	2.5012e-05	914	mt	0.25589	0.09259	0.309164	0.309164	0.367422	FALSE	0.0525785	0.028304	0.034531
S079WTS003	Strobl:2012tibetan	89.9215	31.4211	0.00498374	549	pa	0.1828	0.01527	0.186201	0.186201	0.205695	FALSE	0.0616829	0.0219876	0.0345504
S106WTS024	LeRouxMallouf:2015bhutan	89.7548	27.5341	0.00502014	1334	mt	0.42977	0.10727	0.464041	0.464041	0.536767	FALSE	0.177511	0.218457	0.171798
S079WTS014	Strobl:2012tibetan	91.1508	30.9147	0.00500562	802	pa	0.10444	0.00926	0.0944597	0.0944597	0.0979133	FALSE	0.0382463	0.0043776	0.0126119
S149WTS026	Gonzalez:2016panamanian	-79.9056	8.77061	0.00573125	2066	va	0.12833	0.01995	0.13149	0.13149	0.161452	FALSE	0.0242885	0.0333493	0.0207576
S078WTS007	Hippe:2012altiplano	-68.1198	-16.8011	0.00557727	750	sm	0.08443	0.01352	0.112541	0.112541	0.14117	FALSE	0.0185572	0.0212803	0.0166082
S192WTS023	Arkle:2017trinidad	-61.2526	10.7605	0.00195139	2467	mt	0.21923	0.03934	0.260264	0.260264	0.342805	FALSE	0.0459219	0.0772649	0.0476271
S049WTS024	Densmore:2009footwalls	-118.671	38.3274	0.0045443	211	pa	0.26445	0.22429	0.283028	0.283028	0.338656	FALSE	0.0757194	0.0726195	0.0612833
S186WTS003	Portenga:2019potomac	-77.1399	39.1467	0.00448958	1157	mt	0.03045	0.013	0.0458576	0.0458576	0.0516693	FALSE	0.00421108	0.00949483	0.00971263
S050WTS053	Ouimet:2009threshold	101.159	29.7538	0.00500312	1329	ss	0.52778	0.0991725	0.545492	0.545492	0.601295	TRUE	0.239335	0.117589	0.2855
S261WTS027	Riley:2020staircase	-112.329	37.366	0.00449653	397	ss	0.19611	0.15053	0.203384	0.203384	0.257905	FALSE	0.0386265	0.0834381	0.0345557
S024WTS005	Ferrier:2005coast	-123.723	39.3754	2.44603e-05	1350	ss	0.19952	0.11863	0.23634	0.23634	0.308554	FALSE	0.0360594	0.0224095	0.0166647
S056WTS008	Meyer:2010black	8.18988	48.5838	0.00379698	1855	pa	0.30761	0.0503	0.321911	0.321911	0.356915	FALSE	0.0983999	0.0660301	0.069758
S021WTS006	vonBlanckenburg:2004tropical	80.7532	7.4196	0.00568294	1739	mt	0.2897	0.02171	0.301744	0.301744	0.357099	FALSE	0.110859	0.117296	0.0858071
S115WTS042	Adams:2016bhutan	91.6337	27.2848	0.00507361	2857	mt	0.52398	0.48372	0.535515	0.535515	0.584317	FALSE	0.320645	0.296912	0.373132
S083WTS008	VandenBerg:2012entlebuch	8.08905	46.9163	0.000957639	2156	sm	0.3837	0.21653	0.395021	0.395021	0.442381	FALSE	0.0848161	0.0585257	0.0584402
S249WTS007	Heineke:2019menderes	27.5275	38.3288	0.00445321	951	mt	0.31954	0.05982	0.332546	0.332546	0.382315	FALSE	0.100687	0.073983	0.0848422
S015WTS038	Matmon:2003smoky	-83.4919	35.5133	0.00461984	1719	mt	0.33488	0.01859	0.352807	0.352807	0.408547	FALSE	0.0963924	0.0791478	0.0742388
S063WTS014	Cyr:2010italy	16.0392	38.0237	0.0044543	871	mt	0.26935	0.50925	0.294095	0.294095	0.377366	TRUE	0.0785038	0.102937	0.0658
S103WTS007	Godard:2014himalayan	84.6778	27.7631	0.00490347	3205	sm	0.53325	0.21254	0.570093	0.570093	0.662701	FALSE	0.175093	0.395675	0.191473
S182WTS003	Schmidt:2016yunnan	99.3539	27.0527	0.00148681	1337	sm	0.30268	0.06073	0.353041	0.353041	0.457544	FALSE	0.0929561	0.0971379	0.0756089
S055WTS026	DiBiase:2010gabriel	-117.882	34.3212	0.00463252	607	pa	0.49135	0.53601	0.513559	0.513559	0.602269	FALSE	0.177015	0.219788	0.171191
S151WTS027	Derrieux:2014taiwan	121.111	23.1883	0.00514097	3512	mt	0.53365	1.85001	0.539857	0.539857	0.62438	FALSE	0.251414	0.367583	0.315835
S192WTS032	Arkle:2017trinidad	-61.4609	10.7113	0.00384861	2011	mt	0.26776	0.04313	0.305483	0.305483	0.354852	FALSE	0.0537214	0.091593	0.0476704
S070WTS007	Palumbo:2010tibet	99.0364	39.2119	0.00432527	652	pa	0.5561	0.35625	0.576204	0.576204	0.678567	FALSE	0.214912	0.192415	0.21887
S110WTS030	Ansberque:2015longriba	103.324	32.261	0.00471528	1257	ss	0.488	0.18649	0.512088	0.512088	0.568186	FALSE	0.195121	0.150425	0.194841
S069WTS020	Norton:2011alps	12.3208	47.3046	0.00377684	1625	mt	0.4065	0.80429	0.422972	0.422972	0.464479	FALSE	0.171578	0.122851	0.157261
S055WTS025	DiBiase:2010gabriel	-117.793	34.3325	2.56671e-05	645	mt	0.39297	0.13277	0.401437	0.401437	0.510251	FALSE	0.0769446	0.0171418	0.0402213
S038WTS003	Bierman:2007namibian	16.576	-23.8224	2.8383e-05	191	mt	0.0266	0.00354	0.037948	0.037948	0.0384721	FALSE	0.0026081	0.00147927	0.003548
S025WTS054	Safran:2005bolivian	-67.9788	-16.3239	0.00530836	2582	sm	0.6141	0.48289	0.537386	0.537386	0.634854	FALSE	0.275701	0.450777	0.313281
S103WTS017	Godard:2014himalayan	85.0903	27.9522	0.00485069	2573	mt	0.43973	0.453505	0.463821	0.463821	0.530333	TRUE	0.173777	0.180179	0.15287
S076WTS024	Andermann:2011nepal	86.1352	27.6226	0.00489903	2233	mt	0.3365	0.21655	0.354182	0.354182	0.398046	FALSE	0.182547	0.0838894	0.145869
S139WTS015	Olivetti:2016massif	4.7414	45.1419	0.00386389	960	mt	0.09586	0.03277	0.113232	0.113232	0.134592	FALSE	0.026633	0.0228235	0.0228908
S127WTS049	Kober:2015bolivian	-64.0571	-19.7065	0.00364236	941	sm	0.32119	0.57673	0.423672	0.423672	0.56041	FALSE	0.058177	0.363833	0.0804892
S038WTS013	Bierman:2007namibian	16.1751	-23.9343	2.7343e-05	256	pa	0.1717	0.01081	0.185453	0.185453	0.217507	FALSE	0.0143483	0.0236788	0.0134411
S050WTS025	Ouimet:2009threshold	101.97	30.6906	0.0047441	1020	sc	0.65449	0.9065	0.671693	0.671693	0.732766	FALSE	0.355465	0.931496	0.547837
S165WTS040	Cyr:2014distinguishing	10.9711	44.0553	0.00395833	1293	sc	0.35644	0.19792	0.419377	0.419377	0.501859	FALSE	0.0981057	0.151415	0.0959269
S164WTS042	Mandal:2015indian	75.1443	13.1979	0.00514375	6328	mt	0.19083	0.02911	0.212293	0.212293	0.245922	FALSE	0.0722846	0.0621745	0.0535409
S149WTS002	Gonzalez:2016panamanian	-82.9237	8.30476	0.00537222	3924	sc	0.12571	0.32332	0.143731	0.143731	0.198474	FALSE	0.021377	0.0445234	0.0236457
S268WTS011	Adams:2020climate	90.922	26.9859	0.00483194	2698	sm	0.59578	1.1034	0.619288	0.619288	0.702417	FALSE	0.209985	0.393968	0.240257
S026WTS006	Reuter:2005susquehanna	-77.441	40.3877	0.00411611	1137	ss	0.11129	0.00755	0.117423	0.117423	0.123254	FALSE	0.0150745	0.0139074	0.0141042
S036WTS001	Reinhardt:2007spain	-3.4519	37.0037	2.36896e-05	816	mt	0.33106	0.08072	0.315251	0.315251	0.326729	FALSE	0.151757	0.00401296	0.0497073
S076WTS019	Andermann:2011nepal	85.3603	28.0814	0.0047638	3747	mt	0.52376	0.27743	0.539589	0.539589	0.598634	FALSE	0.322913	0.242436	0.476707
S182WTS041	Schmidt:2016yunnan	100.549	21.8657	0.00490139	1910	pa	0.19688	0.04807	0.222766	0.222766	0.297164	FALSE	0.052872	0.0655317	0.0434707
S129WTS006	Nobile:2016ambato	-65.9846	-28.0472	0.00475833	860	mt	0.23778	0.04857	0.284594	0.284594	0.380834	FALSE	0.118079	0.0881195	0.105503
S209WTS014	Rosenkranz:2018shillong	92.0566	25.2568	0.00487083	6176	sm	0.16124	0.05028	0.201988	0.201988	0.229848	FALSE	0.084786	0.0528163	0.100836
S149WTS022	Gonzalez:2016panamanian	-79.4945	9.52378	0.00517014	3186	vb	0.14682	0.25967	0.162502	0.162502	0.215104	FALSE	0.0218321	0.0566868	0.0281559
S030WTS002	Vanacker:2007escarpment	80.805	6.81495	2.94227e-05	2473	mt	0.06143	0.00272	0.120432	0.120432	0.192494	FALSE	0.00745929	0.0209802	0.0151912
S025WTS055	Safran:2005bolivian	-67.9107	-16.3648	0.00515743	2463	sm	0.67706	0.29152	0.495964	0.495964	0.678822	FALSE	0.378604	0.352845	0.593173
S115WTS037	Adams:2016bhutan	91.3908	27.6529	0.00473403	2351	mt	0.44271	0.26723	0.451997	0.451997	0.499746	FALSE	0.26899	0.099199	0.27519
S201WTS008	Heineke:2017reservoir	27.7796	37.9079	0.000254059	824	ss	0.21472	0.09062	0.221554	0.221554	0.292568	FALSE	0.0407898	0.0449589	0.028223
S089WTS001	Gudmundsdottir:2013cruz	-122.075	37.1766	0.00424677	902	ss	0.2585	0.2812	0.285273	0.285273	0.345901	FALSE	0.0550167	0.0958735	0.0522561
S164WTS054	Mandal:2015indian	76.8488	11.3903	0.00511806	1338	pa	0.30587	0.00693	0.335166	0.335166	0.382734	FALSE	0.165192	0.0838827	0.232734
S050WTS040	Ouimet:2009threshold	100.685	32.5809	0.00448857	1012	ss	0.40878	0.0964475	0.444578	0.444578	0.52052	TRUE	0.111406	0.138275	0.100855
S050WTS059	Ouimet:2009threshold	101.877	28.6821	0.00465036	1406	sm	0.55787	1.23232	0.585418	0.585418	0.714538	FALSE	0.306157	0.487883	0.482503
S115WTS010	Adams:2016bhutan	90.9485	27.6846	0.00460833	2458	mt	0.4141	0.10349	0.434254	0.434254	0.501546	FALSE	0.171981	0.117709	0.167079
S249WTS006	Heineke:2019menderes	27.6567	38.2918	0.00415457	850	mt	0.30273	0.08495	0.307627	0.307627	0.357008	FALSE	0.0999923	0.0594323	0.0756876
S253WTS026	Chen:2020morakot	120.748	22.3245	0.00489097	2790	ss	0.45469	0.11298	0.483351	0.483351	0.578963	FALSE	0.14523	0.185023	0.141079
S165WTS022	Cyr:2014distinguishing	16.5927	39.1384	0.00129167	1464	mt	0.15113	0.07669	0.174228	0.174228	0.201848	FALSE	0.0278915	0.0336248	0.0251424
S249WTS016	Heineke:2019menderes	27.8732	38.4279	0.00412354	745	ss	0.23076	0.21068	0.251299	0.251299	0.296205	FALSE	0.0800025	0.0605744	0.0682454
S261WTS009	Riley:2020staircase	-112.543	37.3017	0.00418403	437	sm	0.10157	0.08862	0.116128	0.116128	0.140757	FALSE	0.0272882	0.027391	0.0222692
S046WTS004	Duxburry:2008shenandoah	-78.3263	38.5893	0.00408274	1388	mt	0.2722	0.026008	0.27559	0.27559	0.307242	TRUE	0.0868738	0.047264	0.057347
S021WTS014	vonBlanckenburg:2004tropical	80.8121	6.97207	0.00344131	2136	mt	0.22162	0.0271	0.246687	0.246687	0.291766	FALSE	0.100376	0.0642469	0.130477
S174WTS008	Barreto:2014diamantina	-43.8105	-18.0511	0.00309028	1316	ss	0.07774	0.00733832	0.0887504	0.0887504	0.108153	TRUE	0.0150243	0.0150972	0.0117082
S107WTS001	Morell:2015gap	79.5235	30.4599	0.00446796	2777	sc	0.6085	0.60438	0.573673	0.573673	0.651111	FALSE	0.329331	0.359423	0.389207
S021WTS003	vonBlanckenburg:2004tropical	80.6661	7.17727	0.00512874	2329	mt	0.22913	0.01439	0.242268	0.242268	0.292933	FALSE	0.0667746	0.0580954	0.0465729
S083WTS005	VandenBerg:2012entlebuch	8.11721	46.9263	0.00350556	2077	sc	0.3792	0.30155	0.390708	0.390708	0.427831	FALSE	0.113046	0.148905	0.0864854
S055WTS029	DiBiase:2010gabriel	-117.97	34.3046	0.00425907	588	pa	0.45717	0.26614	0.439228	0.439228	0.525898	FALSE	0.146384	0.14245	0.133054
S015WTS040	Matmon:2003smoky	-83.1996	35.5498	0.00419245	1631	mt	0.3219	0.024	0.351352	0.351352	0.413097	FALSE	0.0906486	0.0958995	0.0784277
S154WTS007	Linari:2016appalachian	-80.8499	36.4589	0.000308333	1200	mt	0.09136	0.0065216	0.11358	0.11358	0.137582	TRUE	0.0121932	0.0162529	0.01272
S072WTS008	Dortch:2011ladakh	77.8426	34.1451	0.00421545	653	nd	0.4266	0.02074	0.417641	0.417641	0.458394	FALSE	0.169275	0.0778581	0.126673
S261WTS048	Riley:2020staircase	-112.343	37.4969	0.00402708	563	sc	0.21389	0.12997	0.213988	0.213988	0.248568	FALSE	0.0421089	0.0441717	0.0322225
S050WTS064	Ouimet:2009threshold	101.372	29.9866	0.00438231	1235	ss	0.26994	0.02409	0.274197	0.274197	0.298799	FALSE	0.107151	0.0494767	0.0780015
S030WTS014	Vanacker:2007escarpment	80.7792	6.74774	2.94186e-05	2504	mt	0.65549	0.02713	0.640491	0.640491	0.690431	FALSE	0.203084	0.0400677	0.147961
S070WTS010	Palumbo:2010tibet	99.2628	38.9951	0.00393202	852	ss	0.5605	1.01658	0.586769	0.586769	0.680047	FALSE	0.226549	0.255004	0.244131
S106WTS008	LeRouxMallouf:2015bhutan	89.5716	27.5231	0.00446181	1106	mt	0.46119	0.12096	0.485978	0.485978	0.549621	FALSE	0.223747	0.194002	0.268045
S181WTS009	Rossi:2017baja	-115.325	30.9734	0.00431111	271	pa	0.49987	0.09057	0.576112	0.576112	0.641184	FALSE	0.207303	0.643736	0.232829
S037WTS012	Wittmann:2007switzerland	8.70959	46.3988	0.00346189	2516	mt	0.65637	0.61674	0.65215	0.65215	0.704945	FALSE	0.336575	0.704775	0.416761
S115WTS035	Adams:2016bhutan	91.259	27.397	0.00445417	2386	sm	0.5847	0.63055	0.598015	0.598015	0.637684	FALSE	0.354262	0.292778	0.401394
S186WTS042	Portenga:2019potomac	-79.169	38.5334	0.003025	1292	ss	0.26787	0.02408	0.315028	0.315028	0.369566	FALSE	0.0609644	0.0745479	0.0481035
S186WTS022	Portenga:2019potomac	-76.9901	38.5758	0.00391181	1097	su	0.02536	0.00414	0.0461772	0.0461772	0.0445524	FALSE	0.00425313	0.00979443	0.010505
S096WTS011	Glotzbach:2013glacially	6.15039	45.355	0.00350967	1958	mt	0.5342	0.39372	0.54259	0.54259	0.606407	FALSE	0.258756	0.349969	0.278223
S018WTS003	Morel:2003wutach	8.27766	47.9029	0.00331201	1350	ss	0.08211	0.03421	0.10061	0.10061	0.104546	FALSE	0.0216121	0.0203155	0.0193886
S192WTS016	Arkle:2017trinidad	-61.4336	10.7429	0.000214583	2180	mt	0.42749	0.06132	0.497701	0.497701	0.566622	FALSE	0.11414	0.212006	0.103771
S098WTS005	Buscher:2013menderes	28.1733	38.3278	0.00387264	758	mt	0.41984	0.26535	0.440271	0.440271	0.506193	FALSE	0.185955	0.0938491	0.170524
S268WTS003	Adams:2020climate	89.4904	26.8903	0.00439028	4810	mt	0.5277	3.66586	0.548543	0.548543	0.608945	FALSE	0.251912	0.280551	0.258768
S115WTS004	Adams:2016bhutan	90.6036	27.5333	0.0043625	2253	mt	0.28171	0.07134	0.29225	0.29225	0.356706	FALSE	0.103137	0.0627163	0.0702778
S081WTS015	Roller:2012rwenzori	29.804	0.118118	0.00490945	3502	mt	0.28417	0.03326	0.312334	0.312334	0.399781	FALSE	0.116338	0.100964	0.107171
S260WTS015	He:2020weihe	109.007	33.9713	0.00320139	1068	sc	0.48883	0.13672	0.5342	0.5342	0.650303	FALSE	0.157855	0.426024	0.165937
S121WTS015	Dixon:2016alps	15.676	47.0224	0.00333056	924	sm	0.11492	0.08723	0.139396	0.139396	0.164125	FALSE	0.011832	0.0404386	0.0219272
S128WTS003	McPhillips:2013cordillera	-75.6373	-13.4557	0.00475139	584	sc	0.37535	0.04792	0.444916	0.444916	0.527642	FALSE	0.16604	0.274261	0.173036
S182WTS007	Schmidt:2016yunnan	99.3602	27.0567	0.00236667	1310	sm	0.31512	0.10762	0.357123	0.357123	0.461682	FALSE	0.10389	0.113237	0.0894067
S101WTS030	Munack:2014outpaced	77.9084	33.6834	0.00405492	572	sm	0.5174	0.03225	0.523746	0.523746	0.577098	FALSE	0.249365	0.151986	0.277792
S050WTS047	Ouimet:2009threshold	100.759	31.431	0.00414606	926	sm	0.46641	0.09081	0.490769	0.490769	0.545549	FALSE	0.174023	0.0937921	0.169551
S030WTS011	Vanacker:2007escarpment	80.8047	6.76943	2.31157e-05	2495	mt	0.6169	0.04081	0.619808	0.619808	0.668679	FALSE	0.222867	0.0233409	0.158317
S271WTS024	Brocard:2021guatemala	-90.9357	15.1062	0.00467639	1935	mt	0.36691	0.03871	0.384163	0.384163	0.458994	FALSE	0.140982	0.110466	0.126645
S182WTS052	Schmidt:2016yunnan	100.177	21.8733	0.00448333	1864	mt	0.28482	0.03512	0.310613	0.310613	0.377596	FALSE	0.0869618	0.0899132	0.0700895
S207WTS007	Stutenbecker:2018rhone	7.26033	46.1383	0.00334514	1494	ss	0.46787	1.02454	0.495175	0.495175	0.5257	FALSE	0.29341	0.119147	0.316021
S149WTS039	Gonzalez:2016panamanian	-79.4941	9.52062	0.00474861	3198	vb	0.15295	0.28301	0.169868	0.169868	0.22083	FALSE	0.0234659	0.0587431	0.0291255
S165WTS002	Cyr:2014distinguishing	11.505	44.0961	0.00345764	1134	sc	0.28108	0.35882	0.351841	0.351841	0.444088	TRUE	0.061693	0.1572	0.0623397
S194WTS007	Woelfler:2017menderes	28.1075	37.9918	0.00379228	753	mt	0.37092	0.28873	0.387282	0.387282	0.455735	FALSE	0.137954	0.0954744	0.113752
S049WTS017	Densmore:2009footwalls	-118.711	38.5093	0.000297206	157	pa	0.40925	0.08518	0.432858	0.432858	0.505506	FALSE	0.154698	0.0792205	0.132105
S015WTS037	Matmon:2003smoky	-83.853	35.4958	0.00388927	1685	mt	0.28409	0.019	0.298988	0.298988	0.345745	FALSE	0.100771	0.0562149	0.0763603
S079WTS011	Strobl:2012tibetan	90.0646	31.299	0.00408001	610	pa	0.15332	0.0104	0.155956	0.155956	0.164674	FALSE	0.0599043	0.0213239	0.0414925
S049WTS003	Densmore:2009footwalls	-112.357	45.0785	1.22174e-05	419	mt	0.09243	0.01207	0.125296	0.125296	0.149047	FALSE	0.0120833	0.00710247	0.00649684
S082WTS032	Bookhagen:2012andes	-65.6131	-27.0578	0.00425073	2197	mt	0.25196	0.15969	0.313234	0.313234	0.439461	FALSE	0.0794279	0.113688	0.0683346
S161WTS009	Vanacker:2015transient	-78.9751	-2.67423	0.00475764	1359	py	0.26562	0.09638	0.284031	0.284031	0.336178	FALSE	0.10103	0.0663653	0.0775635
S046WTS032	Duxburry:2008shenandoah	-78.6559	38.3409	0.000170155	1056	mt	0.2535	0.00526	0.262614	0.262614	0.299058	FALSE	0.0541628	0.0382686	0.0377466
S101WTS016	Munack:2014outpaced	77.7865	34.0812	0.00394811	510	nd	0.4968	0.02216	0.50206	0.50206	0.56033	FALSE	0.213355	0.109232	0.199151
S098WTS004	Buscher:2013menderes	28.1367	38.3669	0.00373524	730	mt	0.37596	0.06742	0.382159	0.382159	0.437298	FALSE	0.158617	0.0908183	0.173149
S050WTS039	Ouimet:2009threshold	100.749	32.4114	0.00401943	1200	sm	0.43122	0.13733	0.456174	0.456174	0.515594	FALSE	0.127306	0.131708	0.123091
S061WTS020	Insel:2010bolivian	-63.9217	-19.7467	0.00446338	879	sm	0.29413	0.57764	0.330445	0.330445	0.451836	FALSE	0.0536829	0.174916	0.0659755
S037WTS006	Wittmann:2007switzerland	8.44212	46.592	0.00324847	3088	mt	0.44521	1.25133	0.435299	0.435299	0.498495	FALSE	0.213266	0.256514	0.193971
S101WTS027	Munack:2014outpaced	77.7309	34.1461	0.00390968	543	nd	0.5177	0.0149	0.527256	0.527256	0.578984	FALSE	0.24776	0.134904	0.245308
S271WTS022	Brocard:2021guatemala	-90.712	15.0871	0.00453889	1887	mt	0.34203	0.08848	0.370944	0.370944	0.449751	FALSE	0.136457	0.112498	0.119425
S043WTS003	Codilean:2008spatially	16.4131	-23.2677	0.00427639	270	mt	0.04319	0.00528	0.0506422	0.0506422	0.0582269	FALSE	0.00614925	0.00446887	0.00746346
S049WTS023	Densmore:2009footwalls	-118.678	38.3289	0.00368632	214	pa	0.26104	0.29819	0.279314	0.279314	0.33261	FALSE	0.0684766	0.0690865	0.0546028
S050WTS030	Ouimet:2009threshold	101.227	29.9968	0.00406062	1516	ss	0.4972	0.07847	0.518114	0.518114	0.570592	FALSE	0.191682	0.144763	0.19357
S069WTS028	Norton:2011alps	11.2411	46.1273	0.00324254	1028	va	0.28057	0.20061	0.281593	0.281593	0.305168	FALSE	0.108709	0.0634251	0.0921959
S079WTS001	Strobl:2012tibetan	90.1376	31.2835	0.00398162	686	pa	0.1336	0.00975	0.142477	0.142477	0.149869	FALSE	0.0602661	0.0205748	0.0447272
S014WTS008	Clapp:2002arid	-114.558	33.1258	0.00390176	99	va	0.10167	0.0297025	0.117541	0.117541	0.186187	TRUE	0.0123967	0.0457124	0.0201754
S006WTS002	Clapp:2000exceeds	34.9373	29.581	9.0499e-06	21	su	0.0847	0.0243646	0.115975	0.115975	0.217298	TRUE	0.00432452	0.00424992	0.00282902
S107WTS011	Morell:2015gap	78.3938	30.7943	0.00400018	2137	ss	0.5096	0.12384	0.521595	0.521595	0.560629	FALSE	0.224262	0.230518	0.206333
S192WTS011	Arkle:2017trinidad	-61.1542	10.7214	0.00457083	2412	mt	0.18496	0.07365	0.231338	0.231338	0.315997	FALSE	0.0402343	0.0792451	0.0403387
S119WTS015	Glotzbach:2016kruger	31.6301	-24.7188	0.00422153	624	pa	0.02632	0.00429	0.0315533	0.0315533	0.0297711	FALSE	0.00407639	0.0020636	0.00497793
S115WTS034	Adams:2016bhutan	91.273	27.2758	0.004125	2505	sm	0.46665	0.12298	0.485387	0.485387	0.536868	FALSE	0.206516	0.139928	0.204644
S200WTS024	Cook:2018gongga	102.118	29.4638	0.00403958	2481	sm	0.58521	2.70764	0.615109	0.615109	0.74296	FALSE	0.44118	0.255783	0.573119
S073WTS007	Siame:2011taiwan	121.38	24.4048	0.00422038	3777	ss	0.54077	0.6769	0.566955	0.566955	0.655171	FALSE	0.24005	0.268213	0.274859
S115WTS032	Adams:2016bhutan	90.3852	27.5657	0.00407361	1670	mt	0.4069	0.1174	0.432359	0.432359	0.516618	FALSE	0.15689	0.125426	0.14384
S043WTS001	Codilean:2008spatially	16.2367	-23.5487	0.00404931	324	pa	0.21265	0.01476	0.236304	0.236304	0.308772	FALSE	0.072827	0.0648997	0.0667229
S026WTS023	Reuter:2005susquehanna	-76.9698	41.769	0.00341386	1045	ss	0.11807	0.07227	0.125442	0.125442	0.134714	FALSE	0.0205003	0.0140821	0.0157045
S050WTS013	Ouimet:2009threshold	100.783	31.9448	0.00388183	1075	ss	0.47712	0.1372	0.488579	0.488579	0.546175	FALSE	0.167191	0.0979898	0.164861
S015WTS001	Matmon:2003smoky	-83.262	35.6512	0.00367955	1748	mt	0.29387	0.01975	0.320963	0.320963	0.372537	FALSE	0.0652716	0.0900775	0.0600915
S165WTS020	Cyr:2014distinguishing	16.6703	39.0683	0.00351528	1401	mt	0.21751	0.1494	0.261964	0.261964	0.30497	FALSE	0.0789064	0.0635613	0.0734771
S260WTS002	He:2020weihe	110.061	34.4554	0.00372639	910	mt	0.54732	0.09325	0.487855	0.487855	0.682522	FALSE	0.168443	0.436754	0.206174
S038WTS001	Bierman:2007namibian	16.6962	-23.6704	9.47408e-06	221	su	0.0209	0.00512	0.0297903	0.0297903	0.0192172	FALSE	0.00123832	0.00177025	0.00293557
S179WTS010	DeLong:2017andreas	-123.221	38.5532	0.0035125	1431	ss	0.21046	0.14087	0.248625	0.248625	0.30105	FALSE	0.040217	0.0619138	0.0403045
S115WTS003	Adams:2016bhutan	90.5589	27.5058	0.00393958	2066	mt	0.43177	0.18002	0.455309	0.455309	0.520886	FALSE	0.219127	0.103845	0.210173
S161WTS034	Vanacker:2015transient	-78.8412	-3.16441	0.00442847	1410	py	0.16988	0.06025	0.187257	0.187257	0.237204	FALSE	0.0480472	0.0407121	0.0511916
S165WTS019	Cyr:2014distinguishing	16.6417	39.0527	0.00128681	1330	mt	0.28703	0.06975	0.33493	0.33493	0.384385	FALSE	0.134744	0.0893993	0.124754
S096WTS010	Glotzbach:2013glacially	6.17458	45.3889	0.00309971	2015	pa	0.5266	0.32941	0.541481	0.541481	0.595716	FALSE	0.276924	0.223748	0.28437
S103WTS012	Godard:2014himalayan	84.3029	28.0534	0.00388819	2659	mt	0.31213	0.08506	0.338384	0.338384	0.412507	FALSE	0.0828974	0.11748	0.0702515
S088WTS003	Savi:2014zielbach	11.0164	46.7159	0.00301943	1509	mt	0.5374	0.430775	0.543706	0.543706	0.619056	TRUE	0.327092	0.492448	0.537003
S186WTS012	Portenga:2019potomac	-77.6717	39.284	0.00340833	1111	pa	0.06444	0.00818	0.0694546	0.0694546	0.0755289	FALSE	0.0136805	0.00768026	0.0110663
S225WTS003	Stolle:2018medieval	84.0483	28.2638	0.00384371	3591	mt	0.40815	0.94781	0.420637	0.420637	0.485686	FALSE	0.140347	0.188916	0.129584
S076WTS008	Andermann:2011nepal	85.2499	28.1737	0.00386336	2821	mt	0.57125	2.05903	0.59432	0.59432	0.632406	FALSE	0.323682	0.356723	0.375101
S164WTS011	Mandal:2015indian	76.0406	11.4606	0.00428958	3978	mt	0.23099	0.04144	0.278283	0.278283	0.341356	FALSE	0.0890773	0.151967	0.0861874
S192WTS001	Arkle:2017trinidad	-61.0916	10.721	0.00375833	2296	mt	0.14004	0.05311	0.183836	0.183836	0.251701	FALSE	0.0234733	0.0580812	0.0287154
S185WTS008	Salgado:2016relief	-44.8058	-22.7924	0.00402083	2229	mt	0.2424	0.01081	0.286465	0.286465	0.360785	FALSE	0.068416	0.0826901	0.0606653
S147WTS003	Larsen:2014rapid	170.136	-43.41	0.00316597	6185	su	0.37223	1.65344	0.409911	0.409911	0.489122	FALSE	0.106246	0.178346	0.110024
S262WTS004	Bender:2018yukon	-142.55	63.8089	0.00192222	474	mt	0.16821	0.01002	0.188099	0.188099	0.183243	FALSE	0.0470789	0.22705	0.0563591
S193WTS031	Wang:2017wenchuan	103.716	31.2132	0.00337222	1591	vi	0.489	0.60656	0.499245	0.499245	0.583029	FALSE	0.229714	0.285032	0.22674
S057WTS006	Delunel:2010pelvoux	6.39806	44.8742	0.00307731	1926	mt	0.71221	1.07174	0.611126	0.611126	0.76344	FALSE	0.340708	0.708567	0.400681
S101WTS012	Munack:2014outpaced	76.6438	34.4119	0.00357231	533	pb	0.5205	0.09762	0.552819	0.552819	0.651302	FALSE	0.225278	0.225429	0.245514
S050WTS042	Ouimet:2009threshold	100.434	32.2799	0.00367024	952	ss	0.29093	0.04975	0.305085	0.305085	0.352905	FALSE	0.0782965	0.0567834	0.0565842
S115WTS023	Adams:2016bhutan	89.72	27.4105	0.00383542	1466	mt	0.40224	0.05761	0.418431	0.418431	0.48138	FALSE	0.168652	0.106154	0.141635
S155WTS004	Orem:2016caldera	-106.576	35.8841	0.00134097	556	va	0.29196	0.15422	0.296136	0.296136	0.334852	FALSE	0.129005	0.0490578	0.0809154
S269WTS009	Bellingham:2020ohau	170.003	-43.991	0.00310269	3082	sm	0.57687	0.42737	0.588781	0.588781	0.641545	FALSE	0.25551	0.227452	0.253194
S161WTS008	Vanacker:2015transient	-78.9676	-3.08494	0.00430069	1067	py	0.24456	0.02123	0.26417	0.26417	0.341546	FALSE	0.0444536	0.0721482	0.0411317
S103WTS022	Godard:2014himalayan	85.7863	27.6627	0.00381389	2453	mt	0.40621	0.10841	0.44712	0.44712	0.521331	FALSE	0.164426	0.146863	0.154103
S061WTS022	Insel:2010bolivian	-63.6157	-19.2158	0.00403324	898	sm	0.27108	1.58568	0.305856	0.305856	0.425639	FALSE	0.0461791	0.177364	0.0555233
[truncated: 1,641 more rows]
