# Supplementary material for: Optimising global landscape evolution models with 10 Be
Source: Copernicus journal article supplement (doi:10.5194/esurf-11-865-2023), 2023-09-18
Supplement: Supplementary file 2 [file supfigs.pdf › supplement_v2/supfigs.pdf]

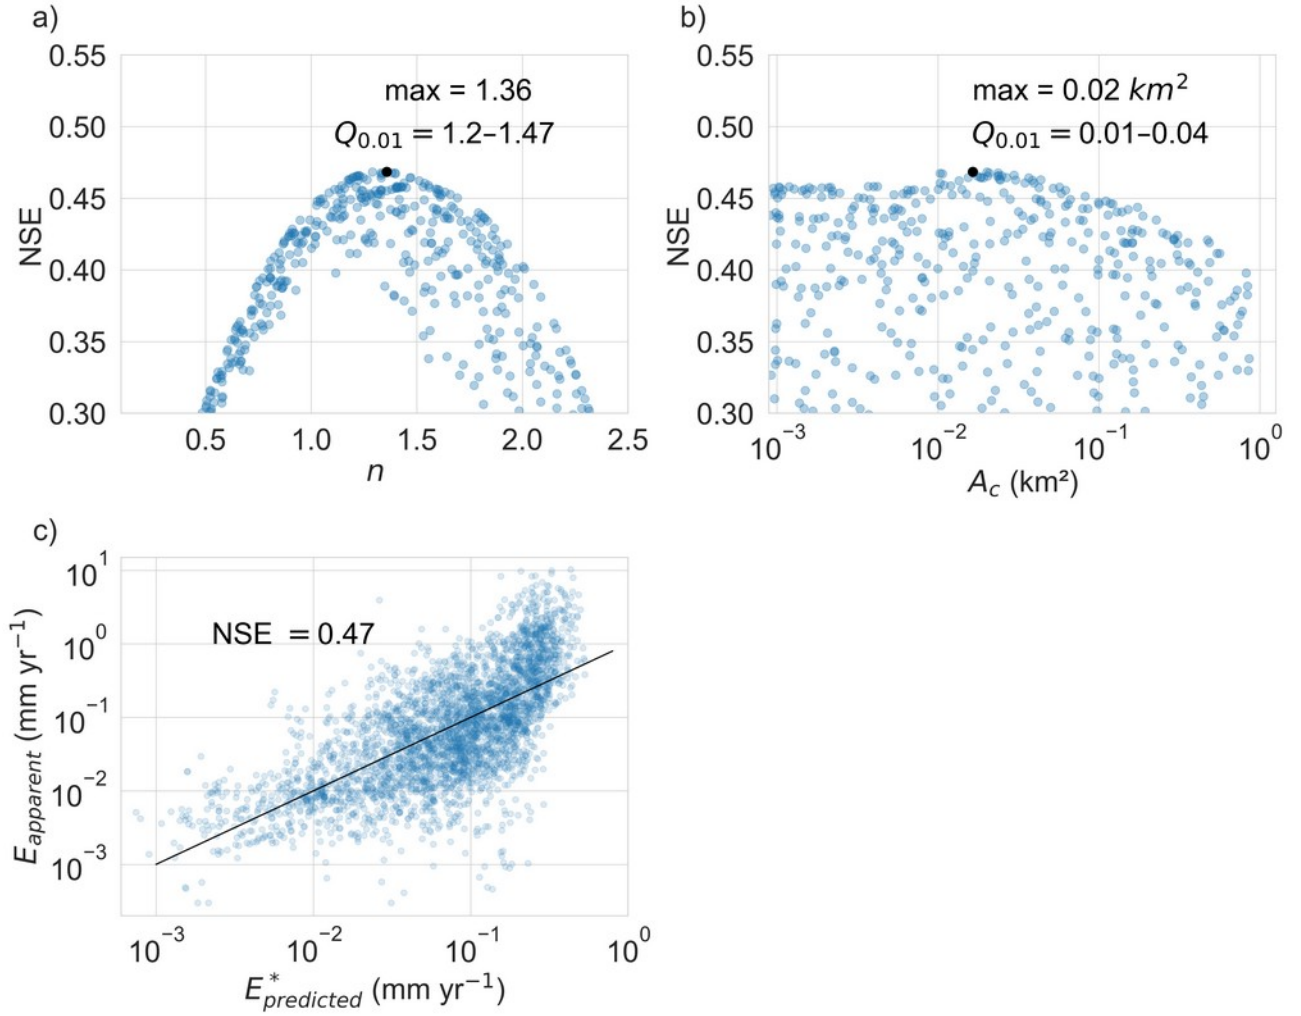

Figure S1: The optimal advection model  $n$  value in the 30m resolution models based on the Copernicus 1-arc second DEM (a) is shifted slightly higher compared with the lower resolution model, (optimal value  $n=1.36$  compared with  $n=1.28$  in the optimal 90m resolution model). Meanwhile, the optimal  $A_c$  (b) is lower ( $A_c=0.02$  km<sup>2</sup> here vs 0.05 km<sup>2</sup> in the low resolution model). The different resolution models are still largely consistent in spite of these differences, and give a similar maximum NSE of 0.47 (c) compared with 0.48 for the 90m model.

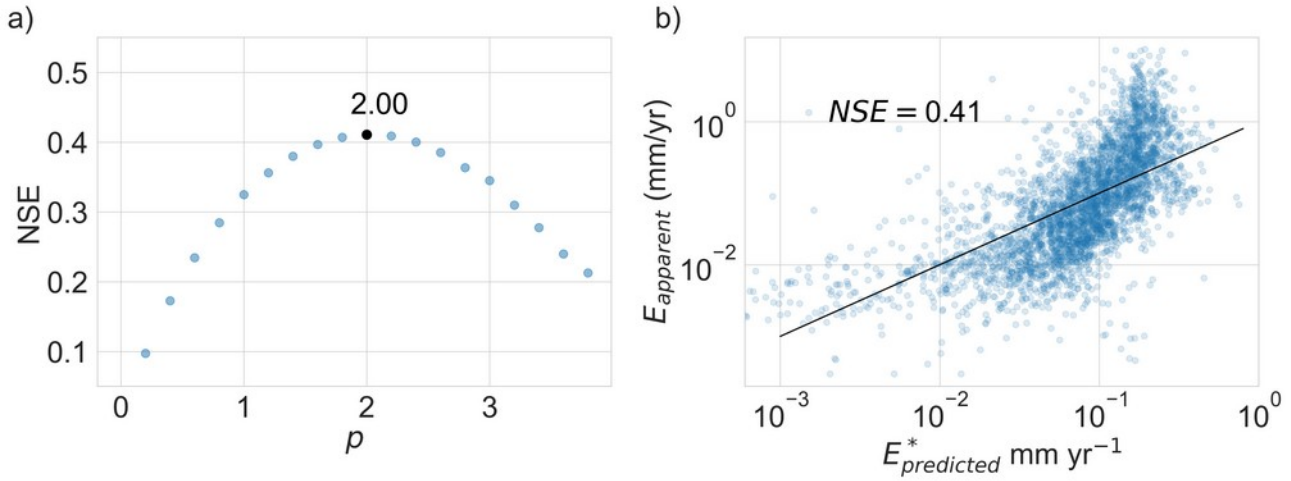

Figure S2: The optimised diffusion exponent in the 30m models of  $p=2.0$  is consistent with that of the lower resolution model of  $p=2.0$ . However, the optimal fit is worse at  $NSE = 0.41$  (compared with  $NSE=0.51$  for SRTM 90). This difference may arise in part because the model based on the SRTM data appears better able to capture the variability of erosion rates (compare panel b to Figure 3b of the main text). This may suggest that the higher scatter of the SRTM surface elevation data, (whether real or due to noise) serves as somewhat of a proxy for surface roughness in steeper / rapidly eroding terranes.

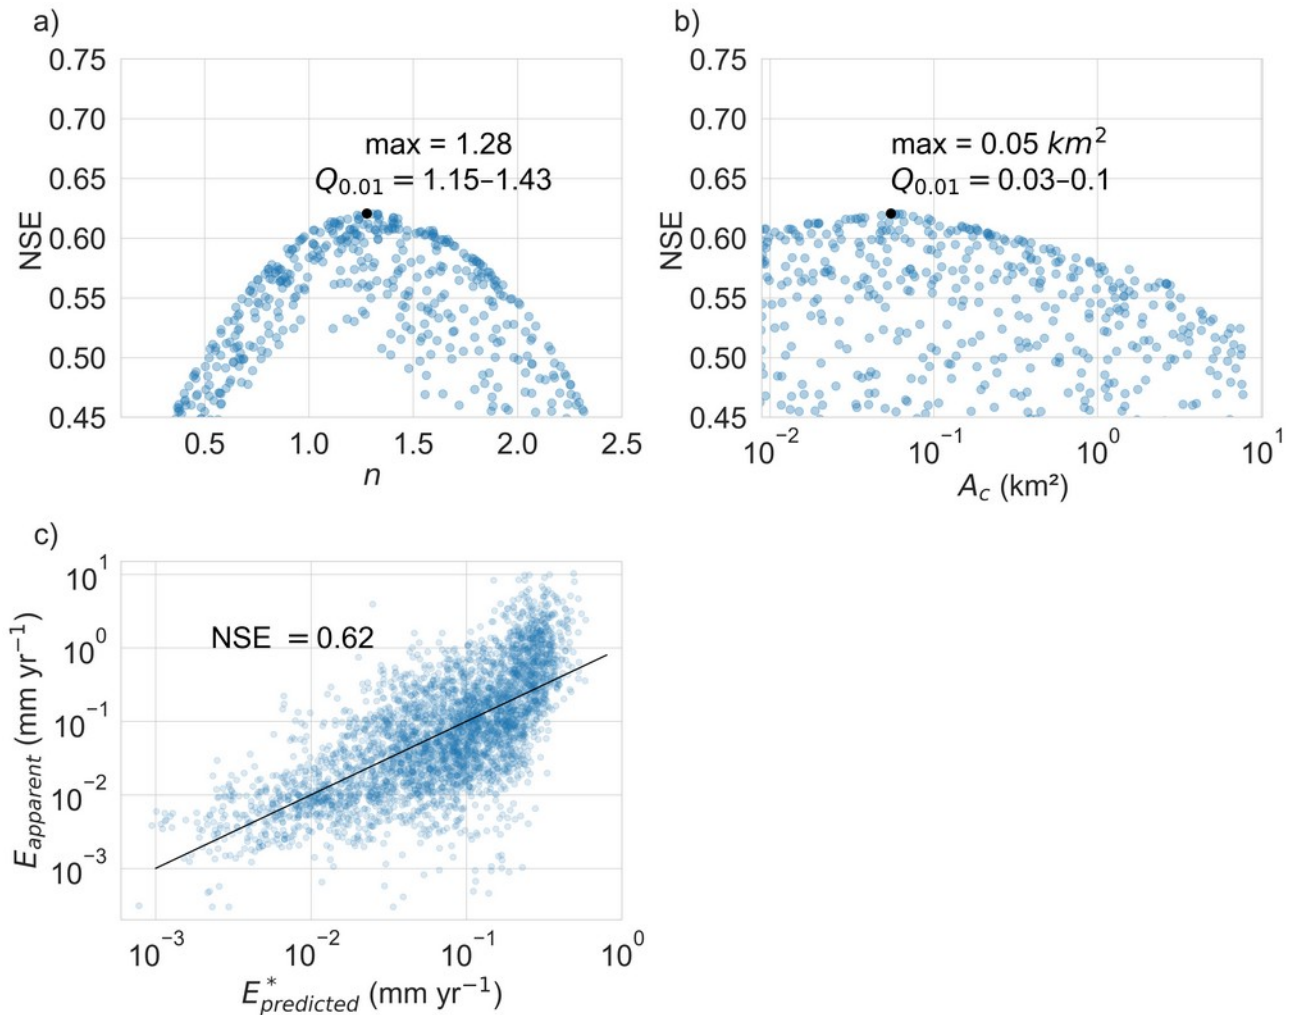

Figure S3: Example of the advection-only model run using a form of NSE that accounts for measurement error after Harmel and Smith (2007). The Model yields nearly the same optimized  $n$  (1.28) and  $A_c$  value ( $0.05 \text{ km}^2$ ) as the model run using NSE on the means from the main text ( $n=1.28$ ,  $A_c = 0.05$ ). The main difference is that the NSE metric is skewed upwards (c;  $\text{NSE}=0.62$ ) because many  $E_{predicted}^*$  estimates lie within the range of measurement error of  $E_{apparent}$ .

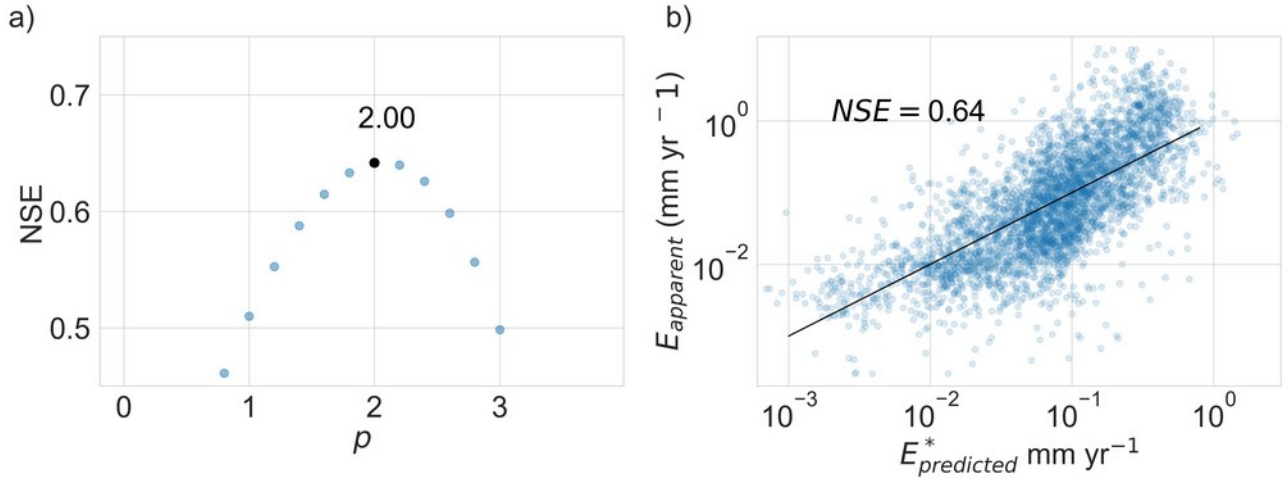

Figure S4: Example of the diffusion-only model run using a form of NSE that accounts for measurement error after Harmel and Smith (2007). The Model yields the same optimized  $p$  (2.0) as the model run using NSE on the means from the main text. The main difference is that the NSE metric is skewed upwards (b;  $\text{NSE}=0.64$ ) because many  $E_{predicted}^*$  estimates lie within the range of measurement error of  $E_{apparent}$ .

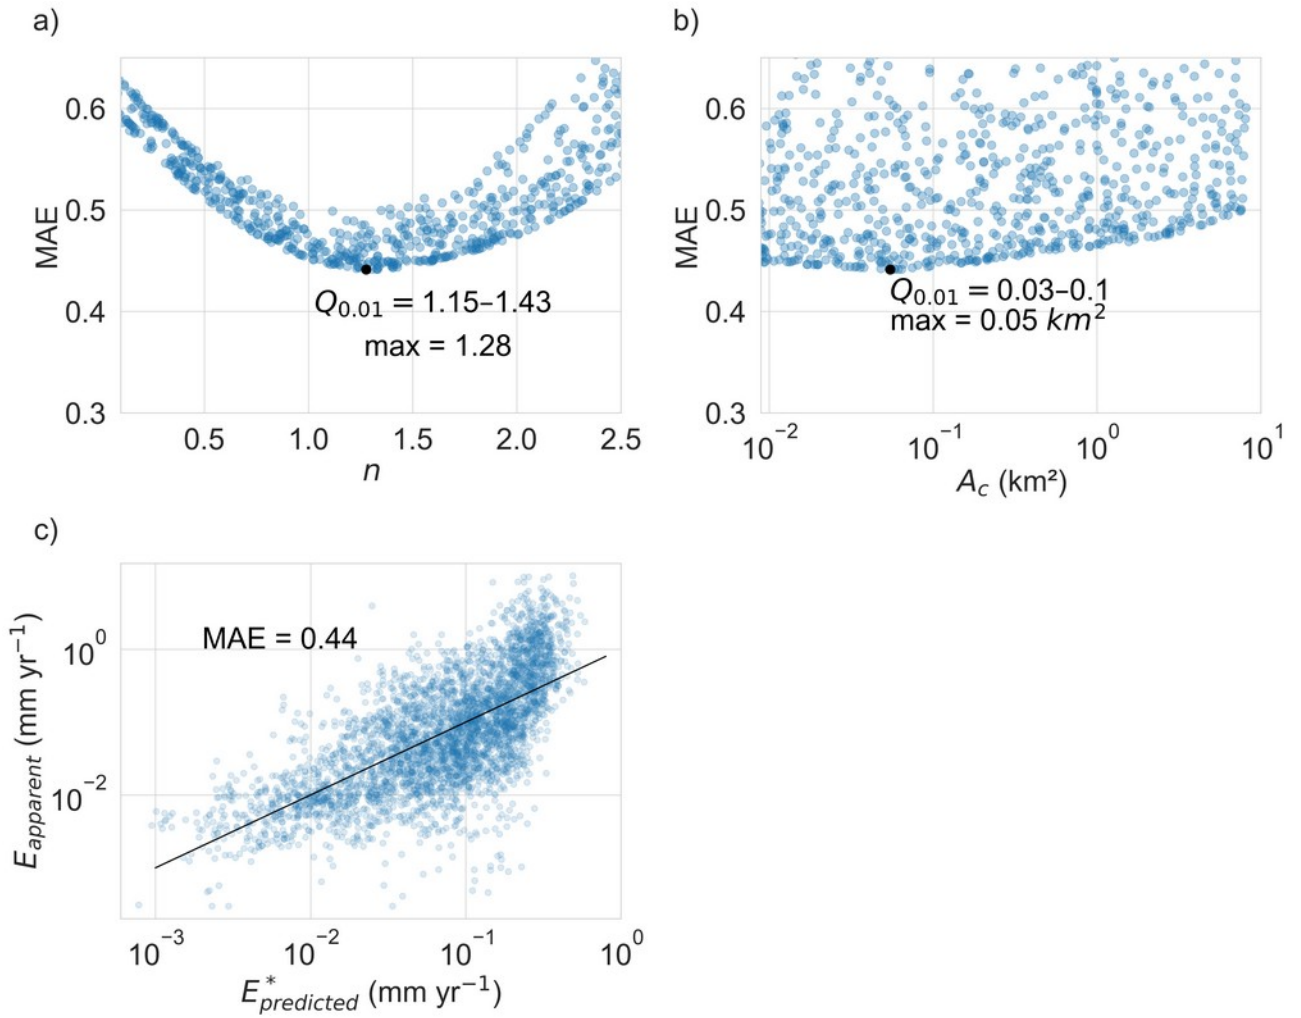

Figure S5: The optimal advection-only values, using MAE as a likelihood function a)  $n=1.28$  and b)  $A_c = 0.05 \text{ km}^2$  are identical to the results from models optimised using NSE of  $n=1.28$  and  $A_c=0.05$ , respectively. The optimal model (c) has an average absolute error of 0.44 (log(mm yr<sup>-1</sup>)).

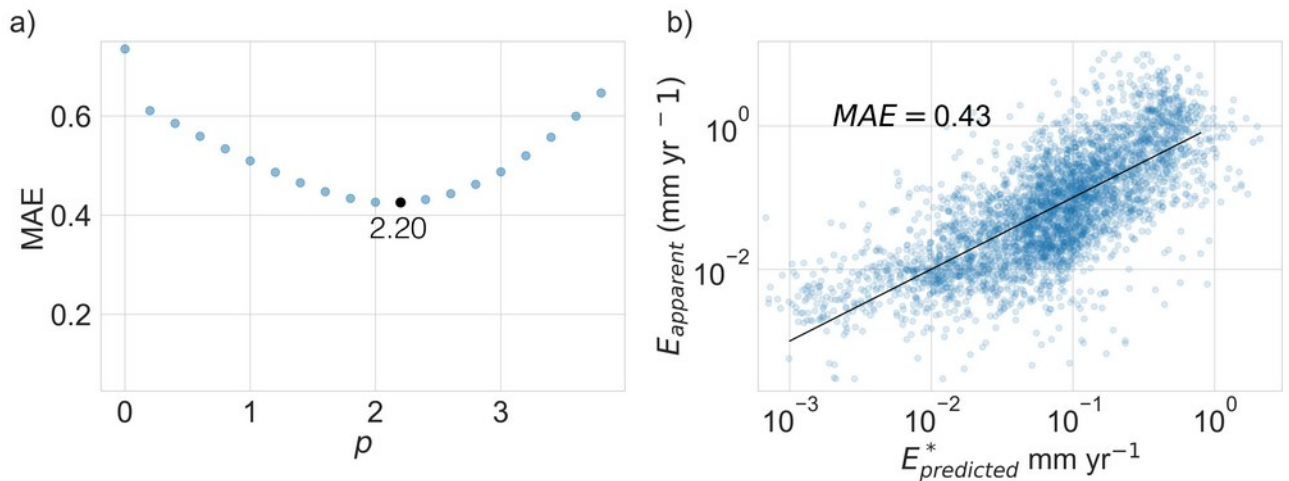

Figure S6: The optimal advection-only values, using MAE as a likelihood function a)  $p=2.2$  is similar to the results from models optimised with NSE,  $p=2.0$ . The optimal model (c) has an average absolute error of 0.43 (log(mm yr<sup>-1</sup>)).

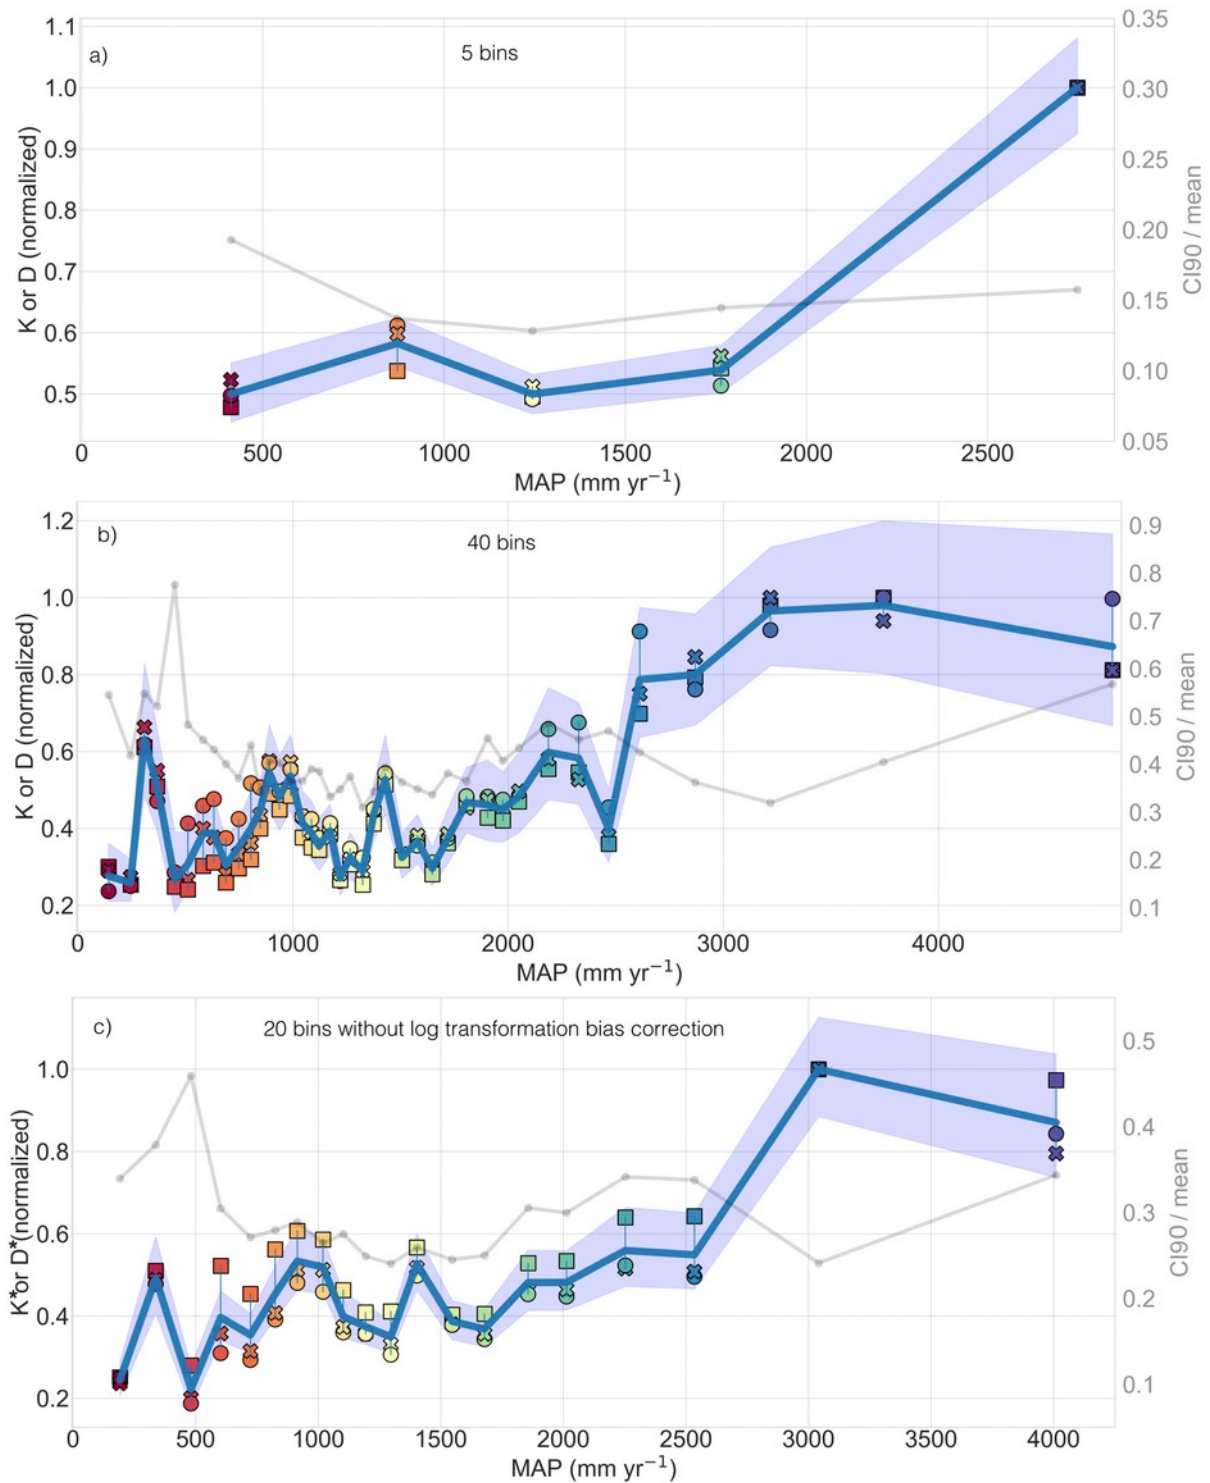

Figure S7: Exploration of binning on the relationships between ( $K$  or  $D$ ) or ( $K^*$  or  $D^*$ ) and MAP. a)  $K$  determined using only 5 MAP bins. b)  $K$  determined using 40 MAP bins, and c) non-log transformed  $K$  ( $K^*$ ) determined using 20 MAP bins. Refer to Figure 5 of the main text for a full description of figure elements.



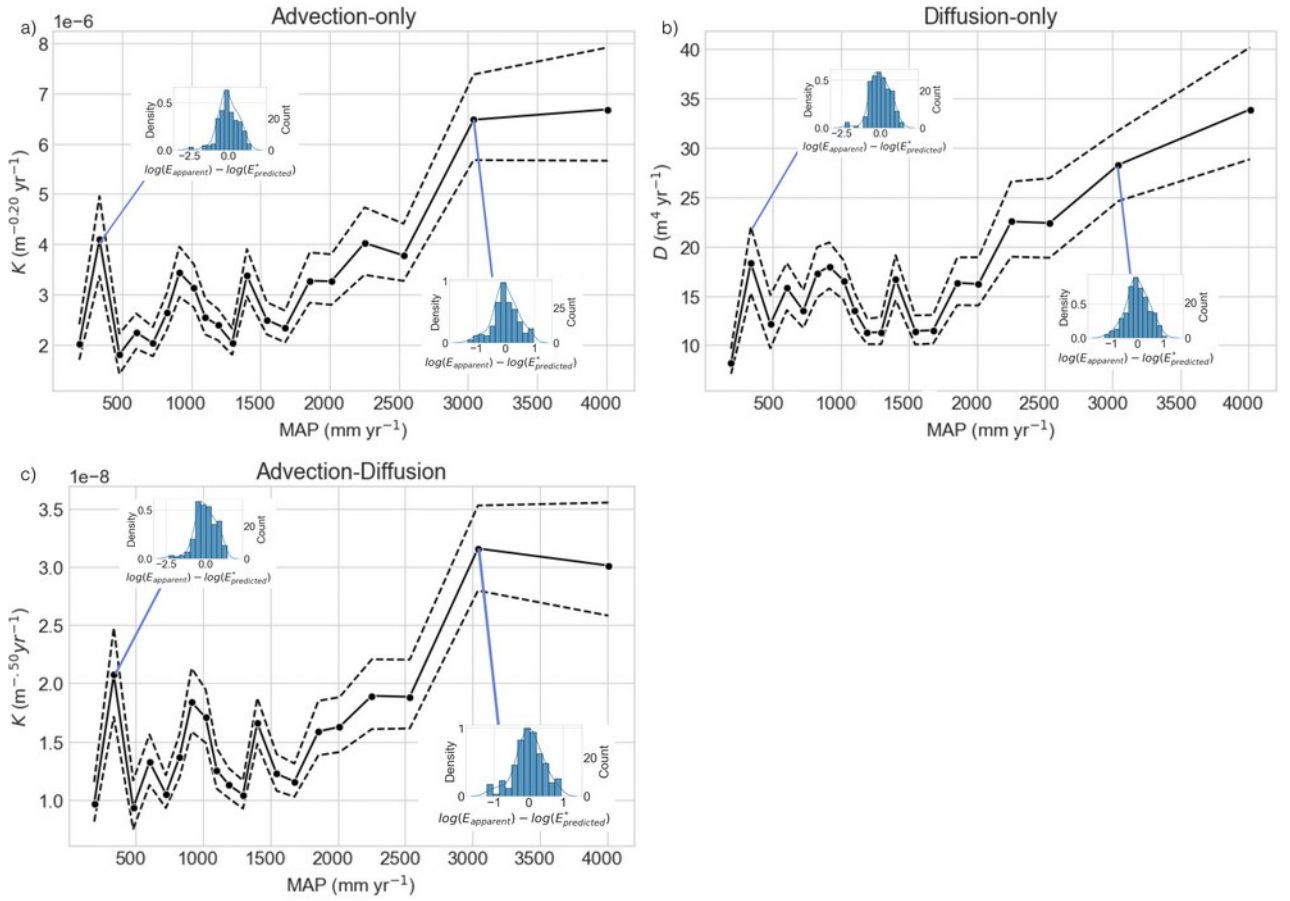

Figure S8: Corresponding Figure for Figure 5 of the main text, showing the 90% confidence intervals surrounding optimized  $K$  values within different climate bins and residuals for each bin. CI was determined by calculating  $K$  within each bin using (nonparametric) bootstrapped values of  $E_{\text{apparent}}$  for 1000 iterations. We also show residuals and corresponding high scatter for select bins, but with a generally log-normal appearance for most bins. a): Advection only with  $n = 1.28$ ,  $A_c = 0.05$ ; b): Diffusion-only with  $p = 2.0$ ; c): Advection-Diffusion with  $n = 2.26$ ,  $A_c = 0.03$ ,  $D/K = 1.79 \cdot 10^6$ .

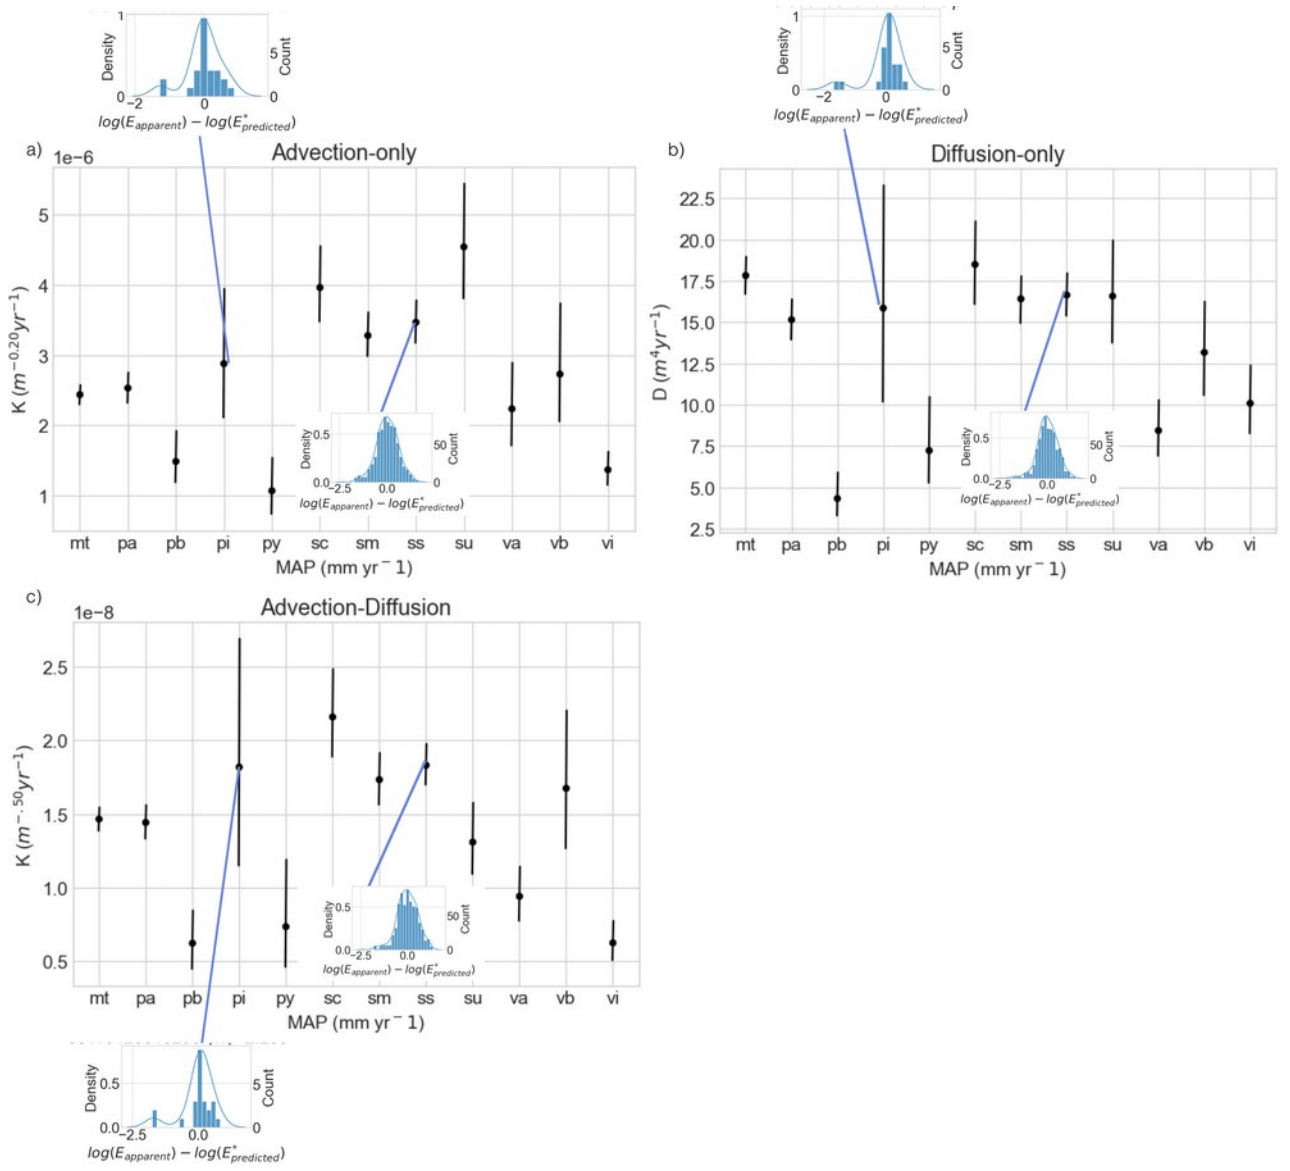

Figure S9: Corresponding Figure for Figure 6 of the main text, showing the 90% confidence intervals surrounding optimized  $K$  values within different climate bins and (inset) residuals select bins. CI was determined by calculating  $K$  within each using bootstrapped values of  $E_{\text{apparent}}$  for 1000 iterations. We also show residuals and corresponding high scatter for select bins, but with a generally log-normal appearance for most bins. The exception to this may be bins with lower numbers of samples (e.g., Plutonic Intrusive), which also have high uncertainty. a: Advection only with  $n = 1.28$ ,  $A_c = 0.05$ ; b: Diffusion-only with  $p = 2.0$ ; c: Advection-Diffusion with  $n=2.26$ ,  $A_c=0.03$ ,  $D/K = 1.79 \cdot 10^6$ .

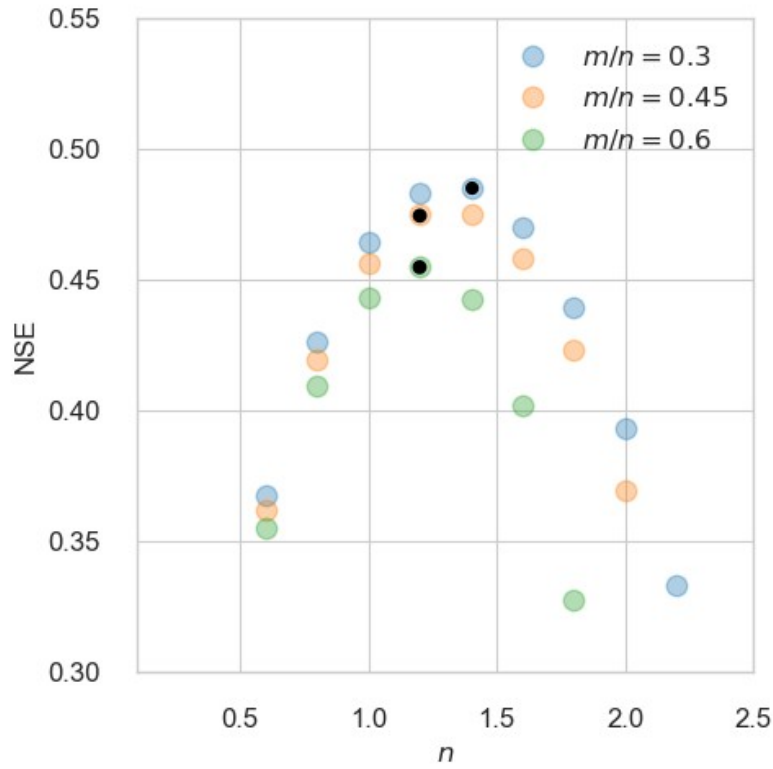

Figure S10: Model results for the advection-only model with free variable  $n$  using different  $m/n$  ratios. The best performance is the model run with  $m/n = 0.3$  ( $n=1.4$ , NSE=0.48), slightly higher than the model run with  $m/n=0.45$  ( $n=1.2$ , NSE=0.47) and higher than the model run with  $m/n=0.6$  ( $n=1.2$ , NSE=0.45). However, our inability to optimise the global average of  $m/n \sim 0.45$  suggests that perhaps our method cannot constrain this parameter while simultaneously solving for  $n$ , and instead it must be inferred directly from topographic morphometry (e.g. Gailleton et al., 2021).
