# Supplementary material for: Optimising global landscape evolution models with 10 Be
Source: Copernicus journal article supplement (doi:10.5194/esurf-11-865-2023), 2023-09-18
Supplement: Supplementary file [file esurf-11-865-2023-supplement-title-page.pdf › esurf-11-865-2023-supplement-title-page.pdf]

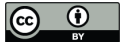

## *Supplement of*

# **Optimising global landscape evolution models with $^{10}\text{Be}$**

**Gregory A. Ruetenik et al.**

*Correspondence to:* Gregory A. Ruetenik (ruetenik@ig.cas.cz)

- esurf-11-865-2023-supplement-title-page.pdf
- supplement\_v2
  - .DS\_Store
  - .lock.TableS1.xlsx#
  - Description\_table1.pdf
  - TableS1.xlsx
  - supfigs.pdf

The copyright of individual parts of the supplement might differ from the article licence.
